# Supplementary material
Source: Royal Society of Chemistry journal article supplement (doi:10.1039/d6cc00372a)
Supplement: d6cc00372a1.pdf [file d6cc00372a1.pdf]

## Supporting Information

### ***peri*-Selective C–H Activation-Initiated Spiroannulation Leading to Spiro Polycyclic Compounds with Unique Photo-Physical Property and Strong Anticancer Activity**

Qianting Zhou<sup>a</sup>, Jiayi Zou<sup>a</sup>, Haiyun Xu<sup>b</sup>, Yijun Gong<sup>a,\*</sup>, Chunhua Ma<sup>a</sup>, Xinying Zhang<sup>a,\*</sup>, Xuesen Fan<sup>a,\*</sup>

<sup>a</sup>*State Key Laboratory of Antiviral Drugs, Pingyuan Laboratory, School of Chemistry and Chemical Engineering,*

*Henan Normal University, Xinxiang, Henan 453007, China*

<sup>b</sup>*Faculty of Chemical Engineering, Henan Technical Institute, Zhengzhou, Henan 450042, China*

*E-mail: gongyijun@htu.cn; xinyingzhang@htu.cn; xuesen.fan@htu.cn*

## Table of Contents

|             |                                                                                             |         |
|-------------|---------------------------------------------------------------------------------------------|---------|
| <b>I</b>    | General experimental information                                                            | S4      |
| <b>II</b>   | Experimental procedures and spectroscopic data                                              |         |
|             | 1. Typical procedure for the synthesis of <b>3a</b> and spectroscopic data of <b>3a-3gg</b> | S5-S21  |
|             | 2. Typical procedure for the synthesis of <b>5a</b> and spectroscopic data of <b>5a-5n</b>  | S21-S27 |
|             | 3. Gram-scale synthesis of <b>3a</b>                                                        | S27-S28 |
|             | 4. Structural elaborations of <b>3a</b>                                                     | S28-S29 |
|             | 5. Cell anti-proliferative activity assay                                                   | S29-S31 |
| <b>III</b>  | Mechanism studies                                                                           |         |
|             | 1. H/D exchange experiment                                                                  | S32     |
|             | 2. Kinetic isotope effect study                                                             | S33     |
|             | 3. Electronic competition experiment                                                        | S33-S34 |
|             | 4. Promosed mechanism for the formation of <b>3a</b>                                        | S34-S35 |
| <b>IV</b>   | NMR Spectra of <b>3a-3gg</b>                                                                | S36-S70 |
| <b>V</b>    | NMR spectra of <b>5a-5n</b>                                                                 | S71-S84 |
| <b>VI</b>   | NMR spectra of <b>6</b> and <b>7</b>                                                        | S85-S86 |
| <b>VII</b>  | X-ray crystal structure and data of <b>3a</b>                                               | S87-S88 |
| <b>VIII</b> | X-ray crystal structure and data of <b>5a</b>                                               | S89-S90 |
| <b>IX</b>   | X-ray crystal structure and data of <b>7</b>                                                | S91-S92 |

|           |                                                                 |         |
|-----------|-----------------------------------------------------------------|---------|
| <b>X</b>  | UV-vis, fluorescence experimental data and cell imaging results |         |
|           | 1. UV-vis, fluorescence experimental data                       | S93-S97 |
|           | 2. cell imaging results                                         | S98     |
| <b>XI</b> | References                                                      | S99     |

## I. General experimental information

Commercial reagents were used without further purification unless otherwise noted. 3-Aryl-1*H*-indazoles **1**,<sup>[1]</sup> diazo homophthalimides **2**,<sup>[2]</sup> and diazonaphthalen-2(1*H*)-ones **4** <sup>[3]</sup> were prepared based on literature procedures. Melting points were recorded with a micro melting point apparatus and uncorrected. The <sup>1</sup>H NMR spectra were recorded at 400 MHz or 600 MHz. The <sup>13</sup>C NMR spectra were recorded at 100 MHz or 150 MHz. The <sup>19</sup>F NMR spectra were recorded at 376 MHz or 565 MHz. Chemical shifts were expressed in parts per million ( $\delta$ ), and were reported as s (singlet), d (doublet), t (triplet), q (quartet), dd (doublet of doublets), td (triplet of doublets), m (multiplet), etc. The coupling constants *J* were given in Hz. High resolution mass spectra (HRMS) were obtained *via* ESI-TOF mode. All reactions were monitored by thin layer chromatography (TLC) using silica gel plates (silica gel 60 F254 0.25 mm), and components were visualized by observation under UV light (254 and 365 nm).

## II. Experimental procedures and spectroscopic data

### 1. Typical procedure for the synthesis of 3a and spectroscopic data of 3a-3gg

To a reaction tube equipped with a stir bar were charged with 3-(naphthalen-1-yl)-1*H*-indazole (**1a**, 24.4 mg, 0.1 mmol), HFIP (1 mL), [IrCp\*Cl<sub>2</sub>]<sub>2</sub> (1.2 mg, 0.0015 mmol), Cs<sub>2</sub>CO<sub>3</sub> (9.8 mg, 0.03 mmol), Ag<sub>2</sub>O (11.6 mg, 0.05 mmol) and 4-diazo-2-methylisoquinoline-1,3(2*H*,4*H*)-dione (**2a**, 20.1 mg, 0.1 mmol). The tube was then sealed, and the resulting mixture was stirred at 100 °C under air for 2 h. Upon completion, it was cooled to room temperature, filtered through a pad of celite, and concentrated under reduced pressure. The residue was purified by silica gel column chromatography using hexane/ethyl acetate (5:1) as eluent to afford **3a**. Other products **3b-3gg** were obtained in a similar manner.

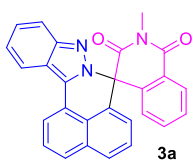

#### 2'-Methyl-1'*H*-spiro[benzo[*de*]indazolo[3,2-*a*]isoquinoline-7,4'-isoquinoline]-1',3'(2'*H*)-dione (**3a**)

Eluent: hexane/ethyl acetate (5:1). Yellow solid (34.8 mg, 84%), mp 277.2-278.4 °C. <sup>1</sup>H NMR (CDCl<sub>3</sub>, 400 MHz): δ 8.44-8.42 (m, 2H), 8.28 (d, *J* = 8.8 Hz, 1H), 7.86-7.84 (m, 2H), 7.71 (t, *J* = 7.6 Hz, 1H), 7.65 (d, *J* = 8.8 Hz, 1H), 7.53 (t, *J* = 7.6 Hz, 1H), 7.47-7.39 (m, 2H), 7.36-7.32 (m, 1H), 7.28-7.24 (m, 1H), 7.01 (d, *J* = 7.6 Hz, 1H), 6.90 (d, *J* = 7.6 Hz, 1H), 3.41 (s, 3H). <sup>13</sup>C {<sup>1</sup>H} NMR (CDCl<sub>3</sub>, 100 MHz): δ 169.6, 163.9, 149.8, 141.9, 134.8, 133.5, 132.6, 132.0, 129.2, 129.1, 128.8, 128.3, 128.0, 127.2, 127.1, 126.6, 125.5, 124.3, 123.5, 123.4, 123.3, 121.6, 121.2, 118.6, 118.1, 70.3, 27.9. HRMS (ESI) *m/z*: [M+Na]<sup>+</sup> Calcd for C<sub>27</sub>H<sub>17</sub>N<sub>3</sub>NaO<sub>2</sub> 438.1213; Found 438.1215.

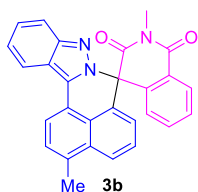

#### 2',3-Dimethyl-1'*H*-spiro[benzo[*de*]indazolo[3,2-*a*]isoquinoline-7,4'-isoquinoline]-1',3'(2'*H*)-dione (**3b**)

Eluent: hexane/ethyl acetate (5:1). Yellow solid (32.2 mg, 75%), mp 312.7-313.0 °C. <sup>1</sup>H NMR (CDCl<sub>3</sub>, 400 MHz): δ 8.42 (d, *J* = 7.6 Hz, 1H), 8.32 (d, *J* = 7.2 Hz, 1H), 8.25 (d, *J* = 8.4 Hz, 1H), 7.80 (d, *J* = 8.4 Hz, 1H), 7.63 (d, *J* = 8.8 Hz, 1H), 7.54-7.49 (m, 2H), 7.45-7.41 (m, 2H), 7.34-7.30 (m, 1H), 7.24-7.20 (m, 1H), 7.02 (d, *J* = 7.6 Hz, 1H), 6.89 (d, *J* = 7.6 Hz, 1H), 3.40 (s, 3H), 2.72 (s, 3H). <sup>13</sup>C {<sup>1</sup>H} NMR (CDCl<sub>3</sub>, 100 MHz): δ 169.7, 164.0, 149.9, 142.0, 135.3, 134.8, 133.1, 132.8, 132.2, 129.1, 128.8, 128.1, 127.9, 127.1, 126.4, 125.5, 125.3, 124.4, 123.4, 123.1, 121.8, 121.6, 121.3, 118.5, 117.8, 70.2, 27.9, 19.8. HRMS (ESI) *m/z*: [M+Na]<sup>+</sup> Calcd for C<sub>28</sub>H<sub>19</sub>N<sub>3</sub>NaO<sub>2</sub> 452.1369; Found 452.1374.

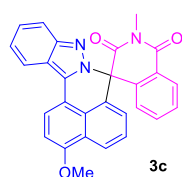

**3-Methoxy-2'-methyl-1'*H*-spiro[benzo[de]indazolo[3,2-*a*]isoquinoline-7,4'-isoquinoline]-1',3'(2'*H*)-dione**

**(3c)**

Eluent: hexane/ethyl acetate (4:1). Yellow solid (30 mg, 67%), mp >320 °C. <sup>1</sup>H NMR (CDCl<sub>3</sub>, 400 MHz): δ 8.42 (d, *J* = 8.0 Hz, 1H), 8.34 (d, *J* = 8.0 Hz, 1H), 8.28 (d, *J* = 8.0 Hz, 1H), 8.21 (d, *J* = 8.4 Hz, 1H), 7.61 (d, *J* = 8.8 Hz, 1H), 7.50 (t, *J* = 7.6 Hz, 1H), 7.44-7.38 (m, 2H), 7.33-7.29 (m, 1H), 7.19 (t, *J* = 8.0 Hz, 1H), 7.04-7.00 (m, 2H), 6.89 (d, *J* = 7.6 Hz, 1H), 4.06 (s, 3H), 3.40 (s, 3H). <sup>13</sup>C {<sup>1</sup>H} NMR (CDCl<sub>3</sub>, 100 MHz): δ 169.8, 164.0, 155.8, 149.8, 142.0, 134.8, 132.4, 132.3, 129.1, 128.8, 128.1, 127.0, 126.1, 126.0, 125.9, 124.4, 124.3, 123.5, 122.7, 122.5, 121.3, 118.4, 117.3, 116.3, 104.9, 70.0, 55.9, 27.9. HRMS (ESI) *m/z*: [M+Na]<sup>+</sup> Calcd for C<sub>28</sub>H<sub>19</sub>N<sub>3</sub>NaO<sub>3</sub> 468.1319; Found 468.1315.

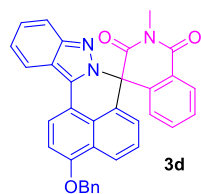

**3-(Benzyloxy)-2'-methyl-1'*H*-spiro[benzo[de]indazolo[3,2-*a*]isoquinoline-7,4'-isoquinoline]-1',3'(2'*H*)-dione**

**e (3d)**

Eluent: hexane/ethyl acetate (5:1). Yellow solid (35 mg, 67%), mp 269.5-270.2 °C.  $^1\text{H}$  NMR ( $\text{CDCl}_3$ , 400 MHz):  $\delta$  8.42 (d,  $J = 7.6$  Hz, 1H), 8.37 (d,  $J = 8.4$  Hz, 1H), 8.33 (d,  $J = 8.0$  Hz, 1H), 8.20 (d,  $J = 8.8$  Hz, 1H), 7.62 (d,  $J = 8.4$  Hz, 1H), 7.54-7.50 (m, 3H), 7.46-7.38 (m, 5H), 7.31 (t,  $J = 7.6$  Hz, 1H), 7.22-7.18 (m, 1H), 7.10 (d,  $J = 8.0$  Hz, 1H), 7.04 (d,  $J = 7.6$  Hz, 1H), 6.90 (d,  $J = 7.6$  Hz, 1H), 5.34 (s, 2H), 3.41 (s, 3H).  $^{13}\text{C}\{^1\text{H}\}$  NMR ( $\text{CDCl}_3$ , 100 MHz):  $\delta$  169.8, 164.0, 154.7, 149.8, 141.9, 136.4, 134.8, 132.4, 129.1, 128.8, 128.3, 128.1, 127.4, 127.0, 126.2, 126.1, 124.5, 124.4, 123.6, 122.7, 122.4, 121.3, 118.4, 117.3, 116.5, 106.3, 70.5, 70.0, 27.9. HRMS (ESI)  $m/z$ :  $[\text{M}+\text{Na}]^+$  Calcd for  $\text{C}_{34}\text{H}_{23}\text{N}_3\text{NaO}_3$  544.1632; Found 544.1637.

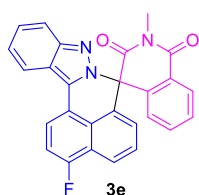

### 3-Fluoro-2'-methyl-1'*H*-spiro[benzo[*de*]indazolo[3,2-*a*]isoquinoline-7,4'-isoquinoline]-1',3'(2'*H*)-dione (3e)

Eluent: hexane/ethyl acetate (5:1). Yellow solid (32.2 mg, 74%), mp 284.3-285.6 °C.  $^1\text{H}$  NMR ( $\text{CDCl}_3$ , 400 MHz):  $\delta$  8.44 (dd,  $J_1 = 8.0$  Hz,  $J_2 = 1.2$  Hz, 1H), 8.34 (dd,  $J_1 = 8.4$  Hz,  $J_2 = 5.2$  Hz, 1H), 8.21 (d,  $J = 8.8$  Hz, 1H), 8.13 (d,  $J = 8.4$  Hz, 1H), 7.63 (d,  $J = 8.8$  Hz, 1H), 7.56-7.44 (m, 3H), 7.40-7.32 (m, 2H), 7.27-7.23 (m, 1H), 7.08 (d,  $J = 7.2$  Hz, 1H), 6.89 (d,  $J = 8.0$  Hz, 1H), 3.41 (s, 3H).  $^{13}\text{C}\{^1\text{H}\}$  NMR ( $\text{CDCl}_3$ , 100 MHz):  $\delta$  169.5, 163.8, 158.4 (d,  $J_{\text{C-F}} = 254.3$  Hz), 149.9, 141.5, 134.9, 132.9 (d,  $J_{\text{C-F}} = 3.6$  Hz), 131.5, 129.3, 128.9, 128.0, 127.2, 127.0 (d,  $J_{\text{C-F}} = 1.4$  Hz), 126.5, 124.7 (d,  $J_{\text{C-F}} = 5.1$  Hz), 124.4, 124.1 (d,  $J_{\text{C-F}} = 17.3$  Hz), 123.5, 122.0 (d,  $J_{\text{C-F}} = 5.1$  Hz), 121.6 (d,  $J_{\text{C-F}} = 7.9$  Hz), 121.0, 120.1 (d,  $J_{\text{C-F}} = 5.1$  Hz), 118.6, 117.8, 111.0 (d,  $J_{\text{C-F}} = 20.9$  Hz), 69.9, 28.0.  $^{19}\text{F}$  NMR ( $\text{CDCl}_3$ , 376 MHz):  $\delta$  -120.02 (dd,  $^1J = 9.8$  Hz,  $^2J = 5.6$  Hz). HRMS (ESI)  $m/z$ :  $[\text{M}+\text{Na}]^+$  Calcd for  $\text{C}_{27}\text{H}_{16}\text{FN}_3\text{NaO}_2$  456.1119; Found 456.1112.

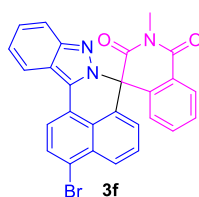

### 3-Bromo-2'-methyl-1'*H*-spiro[benzo[*de*]indazolo[3,2-*a*]isoquinoline-7,4'-isoquinoline]-1',3'(2'*H*)-dione (3f)

Eluent: hexane/acetone (5:1). Yellow solid (33.9 mg, 69%), mp 303.2-303.9 °C.  $^1\text{H}$  NMR ( $\text{CDCl}_3$ , 400 MHz):  $\delta$  8.36 (dd,  $J_1 = 8.0$  Hz,  $J_2 = 1.2$  Hz, 1H), 8.21 (d,  $J = 8.4$  Hz, 1H), 8.16 (d,  $J = 8.0$  Hz, 1H), 8.12 (d,  $J = 8.8$  Hz, 1H), 7.91 (d,  $J = 8.0$  Hz, 1H), 7.56 (d,  $J = 8.8$  Hz, 1H), 7.48-7.42 (m, 2H), 7.37 (td,  $J_1 = 8.0$  Hz,  $J_2 = 0.8$  Hz, 1H), 7.28-7.24 (m, 1H), 7.20-7.16 (m, 1H), 6.99 (d,  $J = 7.6$  Hz, 1H), 6.80 (d,  $J = 7.6$  Hz, 1H), 3.32 (s, 3H).  $^{13}\text{C}\{^1\text{H}\}$  NMR ( $\text{CDCl}_3$ , 100 MHz):  $\delta$  169.4, 163.8, 149.9, 141.5, 134.9, 133.2, 132.2, 131.3, 131.2, 129.4, 128.9, 128.7, 128.1, 127.8, 127.3, 126.6, 124.5, 124.4, 123.7, 123.4, 122.7, 121.7, 121.0, 118.7, 118.1, 70.0, 28.0. HRMS (ESI)  $m/z$ :  $[\text{M}+\text{Na}]^+$  Calcd for  $\text{C}_{27}\text{H}_{16}\text{BrN}_3\text{NaO}_2$  516.0318; Found 516.0319.

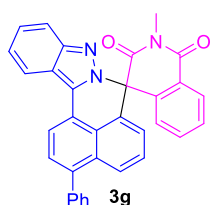

**2'-Methyl-3-phenyl-1'H-spiro[benzo[de]indazolo[3,2-a]isoquinoline-7,4'-isoquinoline]-1',3'(2'H)-dione**

**(3g)**

Eluent: hexane/ethyl acetate (5:1). Yellow solid (36.4 mg, 74%), mp 169.1-170.3 °C.  $^1\text{H}$  NMR ( $\text{CDCl}_3$ , 400 MHz):  $\delta$  8.49 (d,  $J = 7.6$  Hz, 1H), 8.45 (dd,  $J_1 = 8.0$  Hz,  $J_2 = 1.6$  Hz, 1H), 8.32 (d,  $J = 8.8$  Hz, 1H), 7.93 (dd,  $J_1 = 8.8$  Hz,  $J_2 = 1.2$  Hz, 1H), 7.68-7.65 (m, 2H), 7.57-7.47 (m, 7H), 7.38-7.33 (m, 2H), 7.30-7.26 (m, 1H), 7.02 (dd,  $J_1 = 7.2$  Hz,  $J_2 = 0.8$  Hz, 1H), 6.97 (dd,  $J_1 = 7.2$  Hz,  $J_2 = 0.4$  Hz, 1H), 3.42 (s, 3H).  $^{13}\text{C}\{^1\text{H}\}$  NMR ( $\text{CDCl}_3$ , 100 MHz):  $\delta$  169.8, 163.9, 149.9, 141.9, 140.9, 139.9, 134.9, 132.8, 132.1, 132.0, 130.0, 129.2, 128.8, 128.6, 128.2, 127.9, 127.6, 127.2, 126.5, 125.7, 124.5, 123.7, 123.4, 122.8, 121.4, 121.3, 118.6, 118.1, 70.3, 28.0. HRMS (ESI)  $m/z$ :  $[\text{M}+\text{Na}]^+$  Calcd for  $\text{C}_{33}\text{H}_{21}\text{N}_3\text{NaO}_2$  514.1526; Found 514.1543.

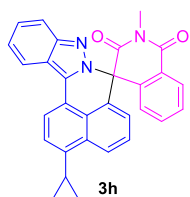

**3-Cyclopropyl-2'-methyl-1'H-spiro[benzo[de]indazolo[3,2-a]isoquinoline-7,4'-isoquinoline]-1',3'(2'H)-dione**

**e (3h)**

Eluent: hexane/ethyl acetate (5:1). Yellow solid (36.1 mg, 79%), mp 217.0-218.7 °C. <sup>1</sup>H NMR (CDCl<sub>3</sub>, 400 MHz): δ 8.44-8.41 (m, 2H), 8.33-8.31 (m, 1H), 8.25-8.23 (m, 1H), 7.64-7.62 (m, 1H), 7.52-7.39 (m, 4H), 7.34-7.29 (m, 1H), 7.24-7.20 (m, 1H), 7.03-7.00 (m, 1H), 6.90-6.88 (m, 1H), 3.40 (s, 3H), 2.35-2.31 (m, 1H), 1.14-1.09 (m, 2H), 0.84-0.81 (m, 2H). <sup>13</sup>C{<sup>1</sup>H} NMR (CDCl<sub>3</sub>, 100 MHz): δ 169.7, 164.0, 149.9, 142.0, 140.2, 134.8, 133.8, 133.0, 132.2, 129.1, 128.8, 128.1, 127.1, 126.4, 125.9, 125.4, 125.2, 124.4, 123.4, 123.1, 121.8, 121.6, 121.3, 118.5, 117.9, 70.2, 27.9, 13.7, 6.8, 6.7. HRMS (ESI) *m/z*: [M+Na]<sup>+</sup> Calcd for C<sub>30</sub>H<sub>21</sub>N<sub>3</sub>NaO<sub>2</sub> 478.1526; Found 478.1529.

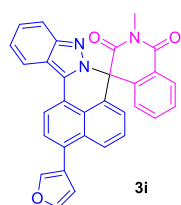

**3-(Furan-3-yl)-2'-methyl-1'*H*-spiro[benzo[de]indazolo[3,2-*a*]isoquinoline-7,4'-isoquinoline]-1',3'(2'*H*)-dione (3i)**

Eluent: hexane/ethyl acetate (5:1). Yellow solid (39.5 mg, 82%), mp 241.7-242.1 °C. <sup>1</sup>H NMR (CDCl<sub>3</sub>, 400 MHz): δ 8.45-8.41 (m, 2H), 8.27 (d, *J* = 8.8 Hz, 1H), 8.16 (dd, *J*<sub>1</sub> = 8.4 Hz, *J*<sub>2</sub> = 0.4 Hz, 1H), 7.69-7.64 (m, 3H), 7.61-7.60 (m, 1H), 7.53 (td, *J*<sub>1</sub> = 7.6 Hz, *J*<sub>2</sub> = 0.8 Hz, 1H), 7.45 (td, *J*<sub>1</sub> = 8.0 Hz, *J*<sub>2</sub> = 1.2 Hz, 1H), 7.42-7.38 (m, 1H), 7.36-7.32 (m, 1H), 7.27-7.23 (m, 1H), 7.03 (dd, *J*<sub>1</sub> = 7.6 Hz, *J*<sub>2</sub> = 0.8 Hz, 1H), 6.93 (d, *J* = 7.6 Hz, 1H), 6.70 (d, *J* = 0.8 Hz, 1H), 3.40 (s, 3H). <sup>13</sup>C{<sup>1</sup>H} NMR (CDCl<sub>3</sub>, 100 MHz): δ 169.7, 163.9, 149.9, 143.3, 141.8, 140.8, 134.8, 133.0, 132.1, 131.9, 131.5, 129.2, 128.8, 128.1, 128.0, 127.2, 127.1, 126.7, 125.8, 124.5, 124.3, 123.7, 123.4, 122.8, 121.4, 121.2, 118.6, 118.1, 112.3, 70.2, 28.0. HRMS (ESI) *m/z*: [M+Na]<sup>+</sup> Calcd for C<sub>31</sub>H<sub>19</sub>N<sub>3</sub>NaO<sub>3</sub> 504.1319; Found 504.1311.

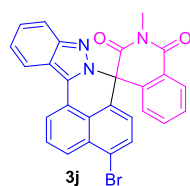

**4-Bromo-2'-methyl-1'*H*-spiro[benzo[de]indazolo[3,2-*a*]isoquinoline-7,4'-isoquinoline]-1',3'(2'*H*)-dione (3j)**

Eluent: hexane/ethyl acetate (5:1). Yellow solid (25.1 mg, 51%), mp >320 °C. <sup>1</sup>H NMR (CDCl<sub>3</sub>, 400 MHz): δ 8.48 (d, *J* = 7.2 Hz, 1H), 8.44 (d, *J* = 8.0 Hz, 1H), 8.26-8.24 (m, 2H), 7.82 (t, *J* = 7.6 Hz, 1H), 7.71 (d, *J* = 8.0 Hz, 1H), 7.64 (d, *J* = 8.8 Hz, 1H), 7.55 (t, *J* = 7.6 Hz, 1H), 7.49-7.45 (m, 1H), 7.37-7.33 (m, 1H), 7.29-7.25 (m, 1H), 6.90 (d, *J* = 8.0 Hz, 1H), 6.84 (d, *J* = 8.0 Hz, 1H), 3.40 (s, 3H). <sup>13</sup>C{<sup>1</sup>H} NMR (CDCl<sub>3</sub>, 100 MHz): δ 169.2, 163.7, 150.0, 141.3, 134.9, 132.6, 132.2, 131.4, 130.6, 129.4, 128.9, 128.7, 128.1, 127.5, 127.3, 125.9, 124.54, 124.47, 124.4, 124.0, 123.7, 122.4, 121.1, 118.7, 118.2, 70.0, 28.0. HRMS (ESI) *m/z*: [M+Na]<sup>+</sup> Calcd for C<sub>27</sub>H<sub>16</sub>BrN<sub>3</sub>NaO<sub>2</sub> 516.0318; Found 516.0312.

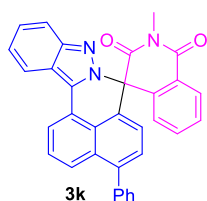

**2'-Methyl-4-phenyl-1'*H*-spiro[benzo[de]indazolo[3,2-*a*]isoquinoline-7,4'-isoquinoline]-1',3'(2'*H*)-dione (3k)**

Eluent: hexane/ethyl acetate (5:1). Yellow solid (42.7 mg, 87%), mp 277.5-378.3 °C. <sup>1</sup>H NMR (CDCl<sub>3</sub>, 400 MHz): δ 8.38-8.36 (m, 2H), 8.21 (d, *J* = 8.4 Hz, 1H), 7.80 (d, *J* = 8.4 Hz, 1H), 7.59-7.54 (m, 2H), 7.49-7.34 (m, 7H), 7.29-7.25 (m, 2H), 7.21-7.17 (m, 1H), 6.96 (d, *J* = 7.2 Hz, 1H), 6.90-6.88 (m, 1H), 3.45 (s, 3H). <sup>13</sup>C{<sup>1</sup>H} NMR (CDCl<sub>3</sub>, 100 MHz): δ 169.7, 164.0, 149.9, 141.8, 141.7, 139.5, 134.9, 132.1, 131.9, 131.8, 130.0, 129.2, 128.8, 128.5, 128.2, 127.9, 127.5, 127.22, 127.16, 126.8, 125.1, 124.5, 123.65, 123.63, 123.4, 121.7, 121.3, 118.6, 118.1, 70.3, 28.0. HRMS (ESI) *m/z*: [M+Na]<sup>+</sup> Calcd for C<sub>33</sub>H<sub>21</sub>N<sub>3</sub>NaO<sub>2</sub> 514.1526; Found 514.1532.

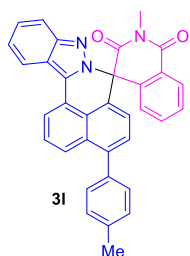

**2'-Methyl-4-(*p*-tolyl)-1'*H*-spiro[benzo[de]indazolo[3,2-*a*]isoquinoline-7,4'-isoquinoline]-1',3'(2'*H*)-dione (3l)**

Eluent: hexane/ethyl acetate (5:1). Yellow solid (43.2 mg, 85%), mp 285.6-286.2 °C. <sup>1</sup>H NMR (CDCl<sub>3</sub>, 400 MHz): δ 8.44 (d, *J* = 7.6 Hz, 2H), 8.29 (d, *J* = 8.4 Hz, 1H), 7.91 (dd, *J*<sub>1</sub> = 8.8 Hz, *J*<sub>2</sub> = 0.8 Hz, 1H), 7.67-7.61 (m, 7H), 7.59-7.54 (m, 2H), 7.29-7.25 (m, 2H), 7.21-7.17 (m, 1H), 6.96 (d, *J* = 7.2 Hz, 1H), 6.90-6.88 (m, 1H), 3.45 (s, 3H). <sup>13</sup>C{<sup>1</sup>H} NMR (CDCl<sub>3</sub>, 100 MHz): δ 169.7, 164.0, 149.9, 141.8, 141.7, 139.5, 134.9, 132.1, 131.9, 131.8, 130.0, 129.2, 128.8, 128.5, 128.2, 127.9, 127.5, 127.22, 127.16, 126.8, 125.1, 124.5, 123.65, 123.63, 123.4, 121.7, 121.3, 118.6, 118.1, 70.3, 28.0. HRMS (ESI) *m/z*: [M+Na]<sup>+</sup> Calcd for C<sub>33</sub>H<sub>21</sub>N<sub>3</sub>NaO<sub>2</sub> 514.1526; Found 514.1532.

2H), 7.54 (td,  $J_1 = 7.6$  Hz,  $J_2 = 0.8$  Hz, 1H), 7.48 (td,  $J_1 = 7.6$  Hz,  $J_2 = 1.6$  Hz, 1H), 7.37-7.25 (m, 7H), 7.02 (d,  $J = 7.6$  Hz, 1H), 6.97 (dd,  $J_1 = 7.6$  Hz,  $J_2 = 0.8$  Hz, 1H), 3.42 (s, 3H), 2.45 (s, 3H).  $^{13}\text{C}\{^1\text{H}\}$  NMR ( $\text{CDCl}_3$ , 100 MHz):  $\delta$  169.8, 164.0, 149.9, 141.9, 141.8, 137.7, 136.6, 134.9, 132.2, 132.0, 131.5, 129.9, 129.22, 129.19, 128.8, 128.2, 127.5, 127.14, 127.11, 126.9, 125.2, 124.5, 123.7, 123.6, 123.4, 121.7, 121.3, 118.6, 118.1, 70.3, 28.0, 21.3. HRMS (ESI)  $m/z$ :  $[\text{M}+\text{Na}]^+$  Calcd for  $\text{C}_{34}\text{H}_{23}\text{N}_3\text{NaO}_2$  528.1682; Found 528.1688.

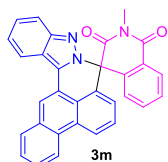

**2'-Methyl-1'H-spiro[dibenzo[de,g]indazolo[3,2-a]isoquinoline-8,4'-isoquinoline]-1',3'(2'H)-dione (3m)**

Eluent: dichloromethane. Yellow solid (21.2 mg, 46%), mp 315.0-316.7 °C.  $^1\text{H}$  NMR ( $\text{CDCl}_3$ , 400 MHz):  $\delta$  8.71-7.69 (m, 2H), 8.64-8.62 (m, 1H), 8.46-8.42 (m, 2H), 8.08-8.06 (m, 1H), 7.70-7.67 (m, 3H), 7.58 (t,  $J = 8.0$  Hz, 1H), 7.53 (t,  $J = 7.6$  Hz, 1H), 7.44 (t,  $J = 7.6$  Hz, 1H), 7.39-7.35 (m, 1H), 7.33-7.30 (m, 1H), 7.11 (d,  $J = 7.2$  Hz, 1H), 6.89 (d,  $J = 8.0$  Hz, 1H), 3.43 (s, 3H).  $^{13}\text{C}\{^1\text{H}\}$  NMR ( $\text{CDCl}_3$ , 100 MHz):  $\delta$  169.7, 163.9, 149.9, 141.7, 134.8, 132.9, 132.0, 131.7, 131.0, 129.9, 129.3, 129.2, 128.9, 128.1, 128.0, 127.8, 127.4, 127.2, 125.7, 124.5, 123.8, 123.4, 123.05, 122.98, 122.6, 121.3, 118.7, 118.1, 70.1, 28.0. HRMS (ESI)  $m/z$ :  $[\text{M}+\text{Na}]^+$  Calcd for  $\text{C}_{31}\text{H}_{19}\text{N}_3\text{NaO}_2$  488.1369; Found 488.1374.

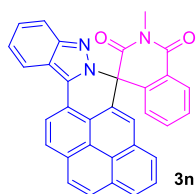

**2'-Methyl-1'H-spiro[indazolo[2,3-b]phenanthro[3,4,5-defg]isoquinoline-7,4'-isoquinoline]-1',3'(2'H)-dione (3n)**

Eluent: hexane/ethyl acetate (5:1). Yellow solid (21.2 mg, 43%), mp  $> 320$  °C.  $^1\text{H}$  NMR ( $\text{CDCl}_3$ , 400 MHz):  $\delta$  8.83 (d,  $J = 8.0$  Hz, 1H), 8.45 (d,  $J = 7.6$  Hz, 1H), 8.33 (d,  $J = 8.4$  Hz, 1H), 8.29 (d,  $J = 8.4$  Hz, 1H), 8.10 (d,  $J = 6.8$  Hz, 1H), 8.01-7.95 (m, 2H), 7.92-7.86 (m, 2H), 7.60 (d,  $J = 8.4$  Hz, 1H), 7.52-7.49 (m, 2H), 7.41 (t,  $J = 7.6$

Hz, 1H), 7.30-7.27 (m, 1H), 7.24-7.20 (m, 1H), 7.01 (d,  $J = 7.6$  Hz, 1H), 3.36 (s, 3H).  $^{13}\text{C}\{^1\text{H}\}$  NMR ( $\text{CDCl}_3$ , 100 MHz):  $\delta$  169.7, 164.1, 150.1, 142.0, 135.0, 132.8, 132.4, 131.4, 131.2, 130.2, 129.3, 128.9, 128.3, 127.8, 127.6, 127.5, 127.2, 126.9, 126.74, 126.70, 126.0, 124.7, 124.6, 124.2, 123.5, 121.4, 121.3, 121.2, 120.6, 118.7, 118.5, 70.6, 28.0. HRMS (ESI)  $m/z$ :  $[\text{M}+\text{Na}]^+$  Calcd for  $\text{C}_{33}\text{H}_{19}\text{N}_3\text{NaO}_2$  512.1369; Found 512.1372.

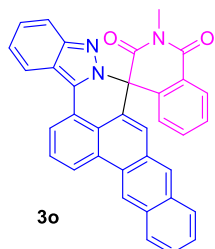

**2'-Methyl-1'H-spiro[benzo[de]indazolo[2,3-b]naphtho[2,3-g]isoquinoline-10,4'-isoquinoline]-1',3'(2'H)-dione (3o)**

Eluent: dichloromethane. Yellow solid (30.7 mg, 60%), mp  $>320$  °C.  $^1\text{H}$  NMR ( $\text{DMSO}-d_6$ , 400 MHz):  $\delta$  9.56 (s, 1H), 9.14 (d,  $J = 8.4$  Hz, 1H), 8.77 (d,  $J = 7.6$  Hz, 1H), 8.57-8.54 (m, 2H), 8.39 (dd,  $J_1 = 8.0$  Hz,  $J_2 = 1.2$  Hz, 1H), 8.27 (d,  $J = 8.4$  Hz, 1H), 8.07-8.03 (m, 2H), 7.80 (s, 1H), 7.69-7.56 (m, 5H), 7.41-7.38 (m, 1H), 7.34-7.30 (m, 1H), 7.11 (d,  $J = 7.6$  Hz, 1H), 3.34 (s, 3H).  $^{13}\text{C}\{^1\text{H}\}$  NMR ( $\text{CF}_3\text{CO}_2\text{D}$ , 100 MHz):  $\delta$  168.2, 164.8, 143.4, 142.4, 137.0, 135.8, 134.4, 133.5, 132.8, 132.4, 131.9, 131.4, 130.0, 129.0, 128.8, 128.3, 128.2, 128.1, 128.0, 127.6, 127.5, 127.2, 127.1, 126.9, 126.7, 126.2, 125.4, 123.0, 122.0, 121.9, 119.5, 117.5, 111.6, 72.0, 27.9. HRMS (ESI)  $m/z$ :  $[\text{M}+\text{H}]^+$  Calcd for  $\text{C}_{35}\text{H}_{22}\text{N}_3\text{O}_2$  516.1707; Found 516.1711.

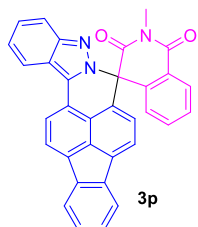

**2'-Methyl-1'H-spiro[fluoreno[2,1,9-def]indazolo[3,2-a]isoquinoline-7,4'-isoquinoline]-1',3'(2'H)-dione (3p)**

Eluent: hexane/ethyl acetate (5:1). Yellow solid (34.1 mg, 70%), mp  $>320$  °C.  $^1\text{H}$  NMR ( $\text{CDCl}_3$ , 400 MHz):  $\delta$  8.46 (dd,  $J_1 = 8.0$  Hz,  $J_2 = 0.8$  Hz, 1H), 8.37 (d,  $J = 7.2$  Hz, 1H), 8.27 (d,  $J = 8.8$  Hz, 1H), 8.07 (d,  $J = 7.2$  Hz, 1H), 7.90 (d,  $J = 6.4$  Hz, 1H), 7.84-7.82 (m, 1H), 7.79 (d,  $J = 7.6$  Hz, 1H), 7.67 (d,  $J = 8.8$  Hz, 1H), 7.56-7.52 (m, 1H),

7.47-7.43 (m, 1H), 7.41-7.34 (m, 3H), 7.31-7.26 (m, 1H), 7.10 (d,  $J = 7.6$  Hz, 1H), 6.85 (d,  $J = 8.0$  Hz, 1H), 3.45 (s, 3H).  $^{13}\text{C}\{^1\text{H}\}$  NMR ( $\text{CDCl}_3$ , 150 MHz):  $\delta$  169.3, 164.0, 149.6, 141.3, 139.4, 138.9, 137.7, 136.6, 134.9, 132.5, 132.3, 132.1, 129.2, 129.0, 128.4, 128.1, 127.7, 127.3, 126.0, 124.3, 123.7, 123.5, 122.2, 122.14, 122.07, 122.0, 121.1, 120.8, 120.3, 118.7, 118.1, 70.7, 28.1. HRMS (ESI)  $m/z$ :  $[\text{M}+\text{Na}]^+$  Calcd for  $\text{C}_{33}\text{H}_{19}\text{N}_3\text{NaO}_2$  512.1369 ; Found 512.1358.

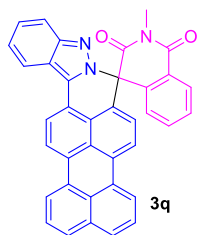

**2'-Methyl-1'H-spiro[benzo[10,5]anthra[2,1,9-def]indazolo[3,2-a]isoquinoline-6,4'-isoquinoline]-1',3'(2'H)-dione (3q)**

Eluent: hexane/ethyl acetate (4:1). Red solid (45.7 mg, 85%), mp 236.1-237.3 °C.  $^1\text{H}$  NMR ( $\text{CDCl}_3$ , 400 MHz):  $\delta$  8.45 (d,  $J = 7.6$  Hz, 1H), 8.28 (d,  $J = 8.0$  Hz, 1H), 8.21-8.17 (m, 2H), 8.05 (d,  $J = 7.6$  Hz, 1H), 7.95-7.93 (m, 2H), 7.67-7.61 (m, 3H), 7.53 (t,  $J = 7.2$  Hz, 1H), 7.46 (t,  $J = 7.2$  Hz, 1H), 7.39 (t,  $J = 8.0$  Hz, 1H), 7.35-7.31 (m, 2H), 7.21 (t,  $J = 7.6$  Hz, 1H), 6.96-6.94 (m, 2H), 3.47 (s, 3H).  $^{13}\text{C}\{^1\text{H}\}$  NMR ( $\text{CDCl}_3$ , 100 MHz):  $\delta$  169.7, 164.0, 149.9, 141.7, 134.9, 134.4, 132.4, 132.0, 131.5, 131.2, 130.2, 129.7, 129.2, 128.9, 128.8, 128.7, 128.5, 128.05, 128.01, 127.2, 126.7, 126.6, 126.0, 124.5, 124.3, 123.4, 122.4, 122.2, 121.3, 121.2, 121.1, 121.0, 120.6, 118.5, 118.1, 70.4, 28.0. HRMS (ESI)  $m/z$ :  $[\text{M}+\text{H}]^+$  Calcd for  $\text{C}_{37}\text{H}_{22}\text{N}_3\text{O}_2$  540.1707; Found 540.1702.

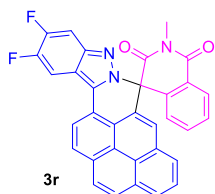

**11,12-Difluoro-2'-methyl-1'H-spiro[indazolo[2,3-b]phenanthro[3,4,5-defg]isoquinoline-7,4'-isoquinoline]-1',3'(2'H)-dione (3r)**

Eluent: hexane/ethyl acetate (5:1). Yellow solid (22.3 mg, 42%), mp  $> 320$  °C.  $^1\text{H}$  NMR ( $\text{CF}_3\text{CO}_2\text{D}$ , 400 MHz):  $\delta$  9.23 (d,  $J = 8.4$  Hz, 1H), 8.89 (d,  $J = 8.0$  Hz, 1H), 8.78-8.74 (m, 1H), 8.71 (d,  $J = 8.4$  Hz, 1H), 8.58 (d,  $J = 7.6$

Hz, 1H), 8.49 (d,  $J = 9.2$  Hz, 1H), 8.38 (d,  $J = 9.2$  Hz, 1H), 8.34 (d,  $J = 7.6$  Hz, 1H), 8.28 (t,  $J = 7.6$  Hz, 1H), 8.14 (t,  $J = 7.6$  Hz, 1H), 8.10-8.06 (m, 1H), 7.97 (s, 1H), 7.82 (d,  $J = 7.6$  Hz, 1H), 7.64-7.61 (m, 1H), 3.57 (s, 3H).  $^{13}\text{C}\{^1\text{H}\}$  NMR ( $\text{CF}_3\text{CO}_2\text{D}$ , 150 MHz):  $\delta$  168.4, 164.8, 144.3 (d,  $J_{\text{C-F}} = 7.7$  Hz), 140.0 (d,  $J_{\text{C-F}} = 11.0$  Hz), 137.1, 136.2, 134.8, 132.5, 131.4, 131.2, 130.7, 130.1, 129.7, 129.6, 128.4, 128.3, 128.0, 127.1, 127.0, 126.7, 126.1, 124.3, 124.1, 123.5, 122.4, 114.5, 109.9 (d,  $J_{\text{C-F}} = 20.9$  Hz), 99.8 (d,  $J_{\text{C-F}} = 23.0$  Hz), 72.8, 27.9.  $^{19}\text{F}$  NMR ( $\text{CDCl}_3$ , 376 MHz):  $\delta$  -133.02 – -133.12 (m), -138.27 – -138.37 (m). HRMS (ESI)  $m/z$ :  $[\text{M}+\text{H}]^+$  Calcd for  $\text{C}_{33}\text{H}_{18}\text{F}_2\text{N}_3\text{O}_2$  526.1362; Found 526.1354.

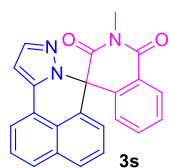

### 2'-Methyl-1'*H*-spiro[benzo[de]pyrazolo[5,1-*a*]isoquinoline-7,4'-isoquinoline]-1',3'(2'*H*)-dione (3s)

Eluent: hexane/ethyl acetate (4:1). Yellow solid (5.4 mg, 15%), mp 179.9-181.1 °C.  $^1\text{H}$  NMR ( $\text{CDCl}_3$ , 400 MHz):  $\delta$  8.43-8.40 (m, 1H), 7.96 (d,  $J = 7.2$  Hz, 1H), 7.86-7.82 (m, 2H), 7.66 (d,  $J = 1.6$  Hz, 1H), 7.63 (t,  $J = 7.6$  Hz, 1H), 7.55-7.52 (m, 2H), 7.38 (t,  $J = 7.6$  Hz, 1H), 7.03-7.01 (m, 1H), 6.96 (d,  $J = 7.6$  Hz, 1H), 6.88 (d,  $J = 2.0$  Hz, 1H), 3.36 (s, 3H).  $^{13}\text{C}\{^1\text{H}\}$  NMR ( $\text{CDCl}_3$ , 150 MHz):  $\delta$  169.9, 163.9, 142.2, 141.3, 140.5, 134.8, 133.5, 132.8, 129.2, 129.0, 128.8, 128.6, 128.0, 127.0, 126.4, 125.5, 124.9, 123.2, 122.2, 121.9, 101.0, 68.9, 27.8. HRMS (ESI)  $m/z$ :  $[\text{M}+\text{Na}]^+$  Calcd for  $\text{C}_{23}\text{H}_{15}\text{N}_3\text{NaO}_2$  388.1056; Found 388.1065.

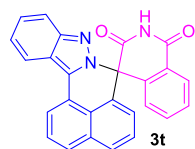

### 1'*H*-Spiro[benzo[de]indazolo[3,2-*a*]isoquinoline-7,4'-isoquinoline]-1',3'(2'*H*)-dione (3t)

Eluent: hexane/acetone (2:1). Yellow solid (35.1 mg, 87%), mp 294.6-295.8 °C.  $^1\text{H}$  NMR ( $\text{DMSO-}d_6$ , 400 MHz):  $\delta$  12.19 (s, 1H), 8.61 (d,  $J = 6.4$  Hz, 1H), 8.51 (d,  $J = 8.0$  Hz, 1H), 8.29 (d,  $J = 7.6$  Hz, 1H), 8.06-8.04 (m, 2H), 7.83-7.80 (m, 1H), 7.63-7.54 (m, 4H), 7.40-7.37 (m, 1H), 7.31-7.25 (m, 2H), 6.91 (d,  $J = 7.2$  Hz, 1H).  $^{13}\text{C}\{^1\text{H}\}$  NMR ( $\text{DMSO-}d_6$ , 100 MHz):  $\delta$  169.9, 164.2, 149.5, 143.5, 135.7, 133.3, 132.9, 131.4, 129.8, 129.5,

129.1, 128.8, 128.01, 127.95, 127.7, 127.6, 126.5, 124.1, 123.8, 123.0, 122.8, 122.4, 122.1, 118.3, 117.8, 69.8.

HRMS (ESI)  $m/z$ :  $[M+Na]^+$  Calcd for  $C_{26}H_{15}N_3NaO_2$  424.1056; Found 424.1063.

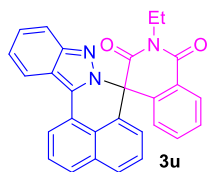

### 2'-Ethyl-1'H-spiro[benzo[de]indazolo[3,2-a]isoquinoline-7,4'-isoquinoline]-1',3'(2'H)-dione (3u)

Eluent: hexane/ethyl acetate (5:1). Yellow solid (34.8 mg, 81%), mp 231.4-232.0 °C.  $^1H$  NMR ( $CDCl_3$ , 600 MHz):  $\delta$  8.44-8.42 (m, 2H), 8.28 (d,  $J = 8.4$  Hz, 1H), 7.86-7.84 (m, 2H), 7.72 (t,  $J = 7.2$  Hz, 1H), 7.66 (d,  $J = 8.4$  Hz, 1H), 7.53 (t,  $J = 7.2$  Hz, 1H), 7.46-7.40 (m, 2H), 7.35 (t,  $J = 7.2$  Hz, 1H), 7.28-7.26 (m, 1H), 7.01 (d,  $J = 7.2$  Hz, 1H), 6.89 (d,  $J = 7.8$  Hz, 1H), 4.11-4.02 (m, 2H), 1.18 (t,  $J = 7.2$  Hz, 3H).  $^{13}C\{^1H\}$  NMR ( $CDCl_3$ , 100 MHz):  $\delta$  169.1, 163.5, 149.8, 141.9, 134.7, 133.6, 132.6, 131.9, 129.14, 129.10, 128.8, 128.3, 128.0, 127.2, 127.1, 126.5, 125.3, 124.5, 123.5, 123.4, 123.3, 121.6, 121.2, 118.7, 118.1, 70.2, 36.4, 12.8. HRMS (ESI)  $m/z$ :  $[M+Na]^+$  Calcd for  $C_{28}H_{19}N_3NaO_2$  452.1369; Found 452.1373.

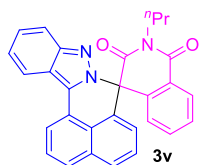

### 2'-Propyl-1'H-spiro[benzo[de]indazolo[3,2-a]isoquinoline-7,4'-isoquinoline]-1',3'(2'H)-dione (3v)

Eluent: hexane/acetone (8:1). Yellow solid (35 mg, 79%), mp 132.1-133.1 °C.  $^1H$  NMR ( $CDCl_3$ , 600 MHz):  $\delta$  8.43-8.41 (m, 2H), 8.27 (d,  $J = 8.4$  Hz, 1H), 7.85-7.84 (m, 2H), 7.70 (t,  $J = 7.8$  Hz, 1H), 7.65 (d,  $J = 8.4$  Hz, 1H), 7.53-7.51 (m, 1H), 7.46-7.43 (m, 1H), 7.41 (t,  $J = 7.8$  Hz, 1H), 7.34 (t,  $J = 7.2$  Hz, 1H), 7.27-7.25 (m, 1H), 7.01 (d,  $J = 7.8$  Hz, 1H), 6.90 (d,  $J = 8.4$  Hz, 1H), 4.00-3.92 (m, 2H), 1.65-1.56 (m, 2H), 0.86 (t,  $J = 7.2$  Hz, 3H).  $^{13}C\{^1H\}$  NMR ( $CDCl_3$ , 100 MHz):  $\delta$  169.4, 163.7, 149.8, 141.8, 134.7, 133.5, 132.7, 132.0, 129.2, 129.1, 128.9, 128.3, 128.0, 127.3, 127.1, 126.5, 125.4, 124.5, 123.5, 123.4, 123.3, 121.6, 121.2, 118.7, 118.1, 70.3, 42.7, 21.0, 11.3. HRMS (ESI)  $m/z$ :  $[M+Na]^+$  Calcd for  $C_{29}H_{21}N_3NaO_2$  466.1526; Found 466.1517.

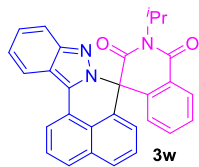

**2'-Isopropyl-1'H-spiro[benzo[de]indazolo[3,2-a]isoquinoline-7,4'-isoquinoline]-1',3'(2'H)-dione (3w)**

Eluent: hexane/ethyl acetate (8:1). Yellow solid (36.3 mg, 82%), mp 235.4-236.2 °C.  $^1\text{H}$  NMR ( $\text{CDCl}_3$ , 400 MHz):  $\delta$  8.43-8.40 (m, 2H), 8.27 (d,  $J = 8.4$  Hz, 1H), 7.84 (d,  $J = 8.0$  Hz, 2H), 7.71-7.66 (m, 2H), 7.53-7.49 (m, 1H), 7.44-7.39 (m, 2H), 7.34 (td,  $J_1 = 6.8$  Hz,  $J_2 = 0.8$  Hz, 1H), 7.27-7.24 (m, 1H), 7.04 (d,  $J = 7.2$  Hz, 1H), 6.86 (d,  $J = 7.6$  Hz, 1H), 5.20-5.09 (m, 1H), 1.44 (d,  $J = 6.8$  Hz, 3H), 1.32 (d,  $J = 7.2$  Hz, 3H).  $^{13}\text{C}$   $\{^1\text{H}\}$  NMR ( $\text{CDCl}_3$ , 100 MHz):  $\delta$  169.4, 164.0, 149.7, 141.6, 134.5, 133.6, 132.4, 132.1, 129.14, 129.09, 128.9, 128.3, 127.8, 127.2, 127.0, 126.4, 125.3, 125.1, 123.5, 123.32, 123.28, 121.6, 121.2, 118.7, 118.0, 70.9, 46.6, 19.9, 18.8. HRMS (ESI)  $m/z$ :  $[\text{M}+\text{Na}]^+$  Calcd for  $\text{C}_{29}\text{H}_{21}\text{N}_3\text{NaO}_2$  466.1526; Found 466.1516.

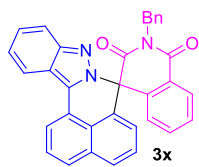

**2'-Benzyl-1'H-spiro[benzo[de]indazolo[3,2-a]isoquinoline-7,4'-isoquinoline]-1',3'(2'H)-dione (3x)**

Eluent: hexane/acetone (8:1). Yellow solid (37.3 mg, 76%), mp 231.5-232.0 °C.  $^1\text{H}$  NMR ( $\text{CDCl}_3$ , 400 MHz):  $\delta$  8.40 (d,  $J = 7.2$  Hz, 2H), 8.26 (d,  $J = 8.4$  Hz, 1H), 7.81 (t,  $J = 8.8$  Hz, 2H), 7.70-7.65 (m, 2H), 7.50-7.47 (m, 1H), 7.41 (t,  $J = 8.0$  Hz, 1H), 7.36-7.23 (m, 6H), 7.20-7.19 (m, 2H), 6.87 (d,  $J = 7.2$  Hz, 2H), 5.20 (s, 2H).  $^{13}\text{C}$   $\{^1\text{H}\}$  NMR ( $\text{CDCl}_3$ , 100 MHz):  $\delta$  169.3, 163.5, 149.9, 141.9, 136.2, 134.9, 133.5, 132.3, 131.9, 129.1, 129.0, 128.7, 128.4, 128.3, 128.0, 127.6, 127.2, 127.1, 126.4, 125.5, 124.3, 123.4, 123.2, 121.6, 121.2, 118.7, 118.1, 70.4, 44.3. HRMS (ESI)  $m/z$ :  $[\text{M}+\text{Na}]^+$  Calcd for  $\text{C}_{33}\text{H}_{21}\text{N}_3\text{NaO}_2$  514.1526; Found 514.1523.

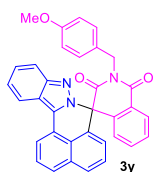

**2'-(4-Methoxybenzyl)-1'H-spiro[benzo[de]indazolo[3,2-a]isoquinoline-7,4'-isoquinoline]-1',3'(2'H)-dione (3y)**

Eluent: hexane/ethyl acetate (4:1). Yellow solid (43.2 mg, 83%), mp 211.3-212.1 °C. <sup>1</sup>H NMR (CDCl<sub>3</sub>, 400 MHz): δ 8.41-8.38 (m, 2H), 8.26 (d, *J* = 8.4 Hz, 1H), 7.82-7.78 (m, 2H), 7.69-7.64 (m, 2H), 7.49-7.45 (m, 1H), 7.39 (td, *J*<sub>1</sub> = 7.6 Hz, *J*<sub>2</sub> = 1.2 Hz, 1H), 7.35-7.31 (m, 1H), 7.28-7.23 (m, 4H), 6.86-6.83 (m, 2H), 6.74-6.71 (m, 2H), 5.13 (s, 2H), 3.72 (s, 3H). <sup>13</sup>C {<sup>1</sup>H} NMR (CDCl<sub>3</sub>, 100 MHz): δ 169.3, 163.5, 159.1, 149.9, 141.9, 134.8, 133.5, 132.3, 131.9, 130.3, 129.1, 129.0, 128.5, 128.3, 127.9, 127.2, 127.1, 126.4, 125.5, 124.3, 123.42, 123.39, 123.2, 121.6, 121.2, 118.7, 118.1, 113.8, 70.4, 55.3, 43.8. HRMS (ESI) *m/z*: [M+Na]<sup>+</sup> Calcd for C<sub>34</sub>H<sub>23</sub>N<sub>3</sub>NaO<sub>3</sub> 544.1632; Found 544.1627.

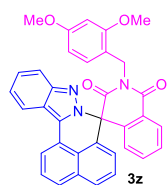

**2'-(2,4-Dimethoxybenzyl)-1'H-spiro[benzo[de]indazolo[3,2-a]isoquinoline-7,4'-isoquinoline]-1',3'(2'H)-dione (3z)**

Eluent: hexane/ethyl acetate (4:1). Yellow solid (42.9 mg, 78%), mp 230.0-231.1 °C. <sup>1</sup>H NMR (DMSO-*d*<sub>6</sub>, 400 MHz): δ 8.61 (d, *J* = 7.6 Hz, 1H), 8.51 (d, *J* = 8.8 Hz, 1H), 8.32 (d, *J* = 6.8 Hz, 1H), 8.07-8.04 (m, 2H), 7.81 (t, *J* = 8.0 Hz, 1H), 7.67-7.62 (m, 2H), 7.59-7.55 (m, 2H), 7.42-7.38 (m, 1H), 7.32-7.28 (m, 1H), 7.24 (d, *J* = 7.2 Hz, 1H), 7.00 (d, *J* = 8.4 Hz, 1H), 6.96 (d, *J* = 8.0 Hz, 1H), 6.49 (d, *J* = 2.4 Hz, 1H), 6.38 (dd, *J*<sub>1</sub> = 8.4 Hz, *J*<sub>2</sub> = 2.0 Hz, 1H), 5.03 (d, *J* = 15.2 Hz, 1H), 4.97 (d, *J* = 15.2 Hz, 1H), 3.70 (s, 3H), 3.66 (s, 3H). <sup>13</sup>C {<sup>1</sup>H} NMR (CDCl<sub>3</sub>, 100 MHz): δ 168.9, 163.6, 160.2, 158.3, 149.8, 141.9, 134.7, 133.4, 132.6, 132.0, 130.0, 129.1, 129.0, 128.9, 128.2, 128.0, 127.2, 127.0, 126.3, 125.8, 124.6, 123.6, 123.4, 123.3, 121.6, 121.2, 118.6, 118.1, 116.7, 103.9, 98.3, 70.5, 55.3, 55.2, 39.8. HRMS (ESI) *m/z*: [M+Na]<sup>+</sup> Calcd for C<sub>35</sub>H<sub>25</sub>N<sub>3</sub>NaO<sub>4</sub> 574.1737; Found 574.1729.

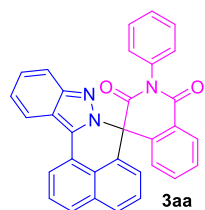

**2'-Phenyl-1'H-spiro[benzo[de]indazolo[3,2-a]isoquinoline-7,4'-isoquinoline]-1',3'(2'H)-dione (3aa)**

Eluent: hexane/ethyl acetate (5:1). Yellow solid (34.3 mg, 72%), mp 168.6-169.3 °C.  $^1\text{H}$  NMR ( $\text{CDCl}_3$ , 400 MHz):  $\delta$  8.47-8.45 (m, 1H), 8.39 (d,  $J=7.2$  Hz, 1H), 8.24 (d,  $J=8.4$  Hz, 1H), 7.87 (d,  $J=8.4$  Hz, 1H), 7.83 (d,  $J=8.4$  Hz, 1H), 7.70-7.65 (m, 2H), 7.56-7.46 (m, 3H), 7.41-7.33 (m, 4H), 7.26-7.22 (m, 2H), 7.17 (d,  $J=7.2$  Hz, 2H), 7.00 (d,  $J=7.6$  Hz, 1H).  $^{13}\text{C}\{^1\text{H}\}$  NMR ( $\text{CDCl}_3$ , 100 MHz):  $\delta$  169.2, 163.8, 149.9, 141.7, 135.1, 134.5, 133.7, 132.5, 132.2, 129.4, 129.3, 129.22, 129.19, 128.8, 128.3, 127.3, 127.2, 126.5, 125.5, 124.8, 123.5, 123.4, 121.7, 121.2, 118.7, 118.1, 71.0. HRMS (ESI)  $m/z$ :  $[\text{M}+\text{Na}]^+$  Calcd for  $\text{C}_{32}\text{H}_{19}\text{N}_3\text{NaO}_2$  500.1369; Found 500.1373.

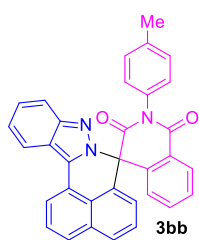

**2'-(*p*-Tolyl)-1'*H*-spiro[benzo[*de*]indazolo[3,2-*a*]isoquinoline-7,4'-isoquinoline]-1',3'(2'*H*)-dione (3bb)**

Eluent: hexane/ethyl acetate (5:1). Yellow solid (38.3 mg, 78%), mp 250.7-251.8 °C.  $^1\text{H}$  NMR ( $\text{CDCl}_3$ , 400 MHz):  $\delta$  8.46 (d,  $J=8.0$  Hz, 1H), 8.38 (d,  $J=7.2$  Hz, 1H), 8.24 (d,  $J=8.8$  Hz, 1H), 7.85 (d,  $J=8.0$  Hz, 1H), 7.82 (d,  $J=8.0$  Hz, 1H), 7.70-7.64 (m, 2H), 7.56-7.45 (m, 3H), 7.36-7.32 (m, 1H), 7.25-7.22 (m, 2H), 7.18 (d,  $J=8.4$  Hz, 2H), 7.05 (d,  $J=7.6$  Hz, 2H), 6.98 (d,  $J=7.6$  Hz, 1H), 2.31 (s, 3H).  $^{13}\text{C}\{^1\text{H}\}$  NMR ( $\text{CDCl}_3$ , 100 MHz):  $\delta$  169.3, 163.9, 149.9, 141.7, 138.8, 135.0, 133.6, 132.5, 132.2, 131.9, 129.9, 129.4, 129.3, 129.2, 128.29, 128.26, 128.0, 127.3, 127.2, 126.5, 125.4, 124.9, 123.6, 123.42, 123.39, 121.7, 121.2, 118.7, 118.1, 71.0, 21.2. HRMS (ESI)  $m/z$ :  $[\text{M}+\text{Na}]^+$  Calcd for  $\text{C}_{33}\text{H}_{21}\text{N}_3\text{NaO}_2$  514.1526; Found 514.1521.

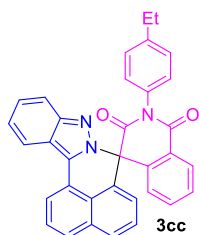

**2'-(4-Ethylphenyl)-1'*H*-spiro[benzo[*de*]indazolo[3,2-*a*]isoquinoline-7,4'-isoquinoline]-1',3'(2'*H*)-dione (3cc)**

Eluent: dichloromethane. Yellow solid (42.4 mg, 84%), mp 241.5-242.4 °C.  $^1\text{H}$  NMR ( $\text{CDCl}_3$ , 400 MHz):  $\delta$  8.46 (dd,  $J_1 = 8.0$  Hz,  $J_2 = 1.6$  Hz, 1H), 8.39 (d,  $J = 7.2$  Hz, 1H), 8.24 (d,  $J = 8.4$  Hz, 1H), 7.86 (d,  $J = 8.0$  Hz, 1H), 7.83 (d,  $J = 8.4$  Hz, 1H), 7.70-7.65 (m, 2H), 7.58-7.46 (m, 3H), 7.36-7.32 (m, 1H), 7.26-7.20 (m, 4H), 7.07 (d,  $J = 7.6$  Hz, 2H), 7.00 (d,  $J = 7.6$  Hz, 1H), 2.61 (q,  $J = 8.0$  Hz, 2H), 1.17 (t,  $J = 7.6$  Hz, 3H).  $^{13}\text{C}$   $\{^1\text{H}\}$  NMR ( $\text{CDCl}_3$ , 100 MHz):  $\delta$  169.3, 163.9, 149.9, 145.0, 141.6, 135.0, 133.6, 132.5, 132.3, 132.0, 129.4, 129.3, 129.2, 128.7, 128.3, 128.0, 127.3, 127.1, 126.5, 125.4, 124.9, 123.6, 123.44, 123.38, 121.6, 121.2, 118.7, 118.1, 71.0, 28.6, 15.4. HRMS (ESI)  $m/z$ :  $[\text{M}+\text{Na}]^+$  Calcd for  $\text{C}_{34}\text{H}_{23}\text{N}_3\text{NaO}_2$  528.1682; Found 528.1680.

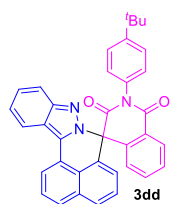

**2'-(4-(*tert*-Butyl)phenyl)-1'*H*-spiro[benzo[*de*]indazolo[3,2-*a*]isoquinoline-7,4'-isoquinoline]-1',3'(2'*H*)-dione (3dd)**

Eluent: hexane/ethyl acetate (5:1). Yellow solid (45.3 mg, 85%), mp 279.9-281.5 °C.  $^1\text{H}$  NMR ( $\text{CDCl}_3$ , 400 MHz):  $\delta$  8.48-8.46 (m, 1H), 8.38 (d,  $J = 6.4$  Hz, 1H), 8.24 (d,  $J = 8.4$  Hz, 1H), 7.86 (d,  $J = 8.0$  Hz, 1H), 7.82 (d,  $J = 8.0$  Hz, 1H), 7.70-7.65 (m, 2H), 7.56-7.45 (m, 3H), 7.41-7.38 (m, 2H), 7.36-7.32 (m, 1H), 7.26-7.22 (m, 2H), 7.09 (d,  $J = 7.2$  Hz, 2H), 7.02 (dd,  $J_1 = 7.6$  Hz,  $J_2 = 0.8$  Hz, 1H), 1.25 (s, 9H).  $^{13}\text{C}$   $\{^1\text{H}\}$  NMR ( $\text{CDCl}_3$ , 100 MHz):  $\delta$  169.4, 163.9, 151.7, 149.9, 141.5, 135.1, 133.7, 132.5, 132.4, 131.7, 129.4, 129.3, 129.2, 128.34, 128.28, 127.6, 127.3, 127.2, 126.5, 126.3, 125.5, 125.0, 123.6, 123.5, 123.4, 121.6, 121.2, 118.7, 118.2, 71.1, 34.7, 31.3. HRMS (ESI)  $m/z$ :  $[\text{M}+\text{Na}]^+$  Calcd for  $\text{C}_{36}\text{H}_{27}\text{N}_3\text{NaO}_2$  556.1995; Found 556.1992.

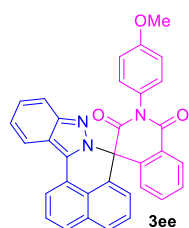

**2'-(4-Methoxyphenyl)-1'*H*-spiro[benzo[*de*]indazolo[3,2-*a*]isoquinoline-7,4'-isoquinoline]-1',3'(2'*H*)-dione (3ee)**

Eluent: hexane/acetone (3:1). Yellow solid (38.5 mg, 76%), mp 159.3-160.2 °C. <sup>1</sup>H NMR (CDCl<sub>3</sub>, 600 MHz): δ 8.46 (d, *J* = 7.8 Hz, 1H), 8.40 (d, *J* = 7.8 Hz, 1H), 8.25 (d, *J* = 8.4 Hz, 1H), 7.87 (d, *J* = 7.8 Hz, 1H), 7.84 (d, *J* = 8.4 Hz, 1H), 7.70-7.67 (m, 2H), 7.56 (t, *J* = 7.2 Hz, 1H), 7.52-7.47 (m, 2H), 7.36-7.33 (m, 1H), 7.24-7.22 (m, 2H), 7.09-7.08 (m, 2H), 7.00 (d, *J* = 7.8 Hz, 1H), 6.90 (d, *J* = 9.0 Hz, 2H), 3.75 (s, 3H). <sup>13</sup>C {<sup>1</sup>H} NMR (CDCl<sub>3</sub>, 150 MHz): δ 169.4, 164.0, 159.6, 149.9, 141.6, 135.0, 133.6, 132.5, 132.2, 129.4, 129.3, 129.2, 128.29, 128.27, 127.3, 127.1, 127.0, 126.5, 125.4, 124.9, 123.6, 123.42, 123.39, 121.7, 121.2, 118.7, 118.1, 114.5, 71.0, 55.5. HRMS (ESI) *m/z*: [M+Na]<sup>+</sup> Calcd for C<sub>33</sub>H<sub>21</sub>N<sub>3</sub>NaO<sub>3</sub> 530.1475; Found 530.1467.

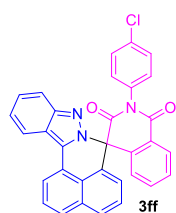

**2'-(4-Chlorophenyl)-1'H-spiro[benzo[de]indazolo[3,2-a]isoquinoline-7,4'-isoquinoline]-1',3'(2'H)-dione (3ff)**

Eluent: hexane/ethyl acetate (5:1). Yellow solid (36.1 mg, 71%), mp 219.2-220.1 °C. <sup>1</sup>H NMR (CDCl<sub>3</sub>, 400 MHz): δ 8.45 (dd, *J*<sub>1</sub> = 8.0 Hz, *J*<sub>2</sub> = 1.2 Hz, 1H), 8.40 (d, *J* = 7.2 Hz, 1H), 8.25 (d, *J* = 8.4 Hz, 1H), 7.87 (d, *J* = 8.4 Hz, 1H), 7.84 (d, *J* = 8.4 Hz, 1H), 7.71-7.67 (m, 2H), 7.58-7.46 (m, 3H), 7.37-7.33 (m, 3H), 7.27-7.20 (m, 2H), 7.12 (d, *J* = 8.4 Hz, 2H), 7.00-6.98 (m, 1H). <sup>13</sup>C {<sup>1</sup>H} NMR (CDCl<sub>3</sub>, 100 MHz): δ 169.1, 163.7, 150.0, 141.7, 135.3, 134.8, 133.7, 133.0, 132.4, 132.1, 129.8, 129.5, 129.44, 129.41, 129.2, 128.39, 128.36, 127.4, 127.3, 126.5, 125.4, 124.6, 123.5, 123.44, 123.39, 121.8, 121.2, 118.6, 118.1, 70.9. HRMS (ESI) *m/z*: [M+Na]<sup>+</sup> Calcd for C<sub>32</sub>H<sub>18</sub>ClN<sub>3</sub>NaO<sub>2</sub> 534.0980; Found 534.0992.

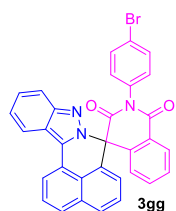

**2'-(4-Bromophenyl)-1'H-spiro[benzo[de]indazolo[3,2-a]isoquinoline-7,4'-isoquinoline]-1',3'(2'H)-dione (3gg)**

Eluent: hexane/ethyl acetate (5:1). Yellow solid (38.8 mg, 70%), mp 232.7-233.5 °C. <sup>1</sup>H NMR (CDCl<sub>3</sub>, 400 MHz): δ 8.44 (d, *J* = 8.0 Hz, 1H), 8.39 (d, *J* = 7.2 Hz, 1H), 8.24 (d, *J* = 8.4 Hz, 1H), 7.87-7.82 (m, 2H), 7.70-7.66 (m, 2H), 7.57-7.45 (m, 5H), 7.36-7.32 (m, 1H), 7.26-7.19 (m, 2H), 7.05 (d, *J* = 7.2 Hz, 2H), 6.98 (d, *J* = 8.0 Hz, 1H). <sup>13</sup>C{<sup>1</sup>H} NMR (CDCl<sub>3</sub>, 100 MHz): δ 169.1, 163.6, 150.0, 141.7, 135.3, 133.7, 133.5, 132.4, 132.3, 132.1, 130.1, 129.5, 129.4, 129.2, 128.39, 128.36, 127.4, 127.3, 126.5, 125.4, 124.6, 123.5, 123.43, 123.38, 122.9, 121.8, 121.2, 118.6, 118.1, 70.9. HRMS (ESI) *m/z*: [M+H]<sup>+</sup> Calcd for C<sub>32</sub>H<sub>19</sub>BrN<sub>3</sub>O<sub>2</sub> 556.0655; Found 556.0658.

## 2. Typical procedure for the synthesis of 5a and spectroscopic data of 5a-5n

To a reaction tube equipped with a stir bar were charged with 3-(naphthalen-1-yl)-1*H*-indazole (**1a**, 24.4 mg, 0.1 mmol), HFIP (1 mL), [IrCp\*Cl<sub>2</sub>]<sub>2</sub> (1.2 mg, 0.0015 mmol), Cs<sub>2</sub>CO<sub>3</sub> (9.8 mg, 0.03 mmol), Ag<sub>2</sub>O (11.6 mg, 0.05 mmol) and 1-diazonaphthalen-2(1*H*)-one (**4a**, 17 mg, 0.1 mmol). The tube was then sealed, and the resulting mixture was stirred at 100 °C under air for 2 h. Upon completion, it was cooled to room temperature, filtered through a pad of celite, and concentrated under reduced pressure. The residue was purified by silica gel column chromatography using hexane/ethyl acetate (5:1) as eluent to afford **5a**. Other products **5b-5n** were obtained in a similar manner.

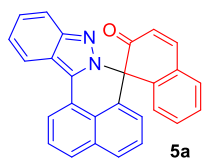

### 2'*H*-Spiro[benzo[de]indazolo[3,2-*a*]isoquinoline-7,1'-naphthalen]-2'-one (**5a**)

Eluent: hexane/ethyl acetate (5:1). Yellow solid (26.6 mg, 69%), mp 289.9-291.7 °C. <sup>1</sup>H NMR (CDCl<sub>3</sub>, 400 MHz): δ 8.30 (d, *J* = 7.2 Hz, 1H), 8.18 (d, *J* = 8.4 Hz, 1H), 7.72-7.68 (m, 2H), 7.65-7.55 (m, 3H), 7.41 (d, *J* = 7.6 Hz, 1H), 7.29-7.21 (m, 3H), 7.17-7.10 (m, 2H), 7.07 (d, *J* = 7.6 Hz, 1H), 6.82 (d, *J* = 7.6 Hz, 1H), 6.10 (d, *J* = 10.0 Hz, 1H). <sup>13</sup>C{<sup>1</sup>H} NMR (CDCl<sub>3</sub>, 100 MHz): δ 193.3, 149.7, 147.0, 145.6, 133.8, 132.05, 131.97, 131.3,

130.0, 129.8, 128.8, 128.5, 128.1, 127.0, 126.7, 126.5, 124.8, 124.0, 123.1, 122.9, 121.6, 121.2, 121.1, 118.6, 118.1, 73.2. HRMS (ESI)  $m/z$ :  $[M+H]^+$  Calcd for  $C_{27}H_{17}N_2O$  385.1335; Found 385.1322.

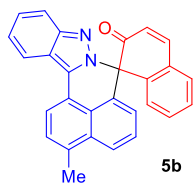

### 3-Methyl-2'*H*-spiro[benzo[de]indazolo[3,2-*a*]isoquinoline-7,1'-naphthalen]-2'-one (5b)

Eluent: hexane/ethyl acetate (4:1). Yellow solid (25.3 mg, 63%), mp 269.1-270.3 °C.  $^1H$  NMR ( $CDCl_3$ , 400 MHz):  $\delta$  8.29 (d,  $J = 7.2$  Hz, 1H), 8.25 (d,  $J = 8.4$  Hz, 1H), 7.94 (dd,  $J_1 = 8.4$  Hz,  $J_2 = 0.8$  Hz, 1H), 7.72 (d,  $J = 10.0$  Hz, 1H), 7.66 (d,  $J = 8.0$  Hz, 1H), 7.51-7.49 (m, 2H), 7.40 (t,  $J = 7.6$  Hz, 1H), 7.35 (td,  $J_1 = 7.6$  Hz,  $J_2 = 1.2$  Hz, 1H), 7.32-7.28 (m, 1H), 7.23-7.15 (m, 3H), 6.89 (d,  $J = 8.0$  Hz, 1H), 6.19 (d,  $J = 10.0$  Hz, 1H), 2.70 (s, 3H).  $^{13}C\{^1H\}$  NMR ( $CDCl_3$ , 100 MHz):  $\delta$  193.4, 149.7, 146.9, 145.7, 135.0, 133.0, 132.5, 132.2, 131.3, 130.0, 129.8, 128.9, 128.8, 127.6, 126.6, 126.3, 124.73, 124.69, 123.2, 122.6, 122.3, 121.7, 121.3, 121.1, 118.5, 117.9, 73.0, 19.8. HRMS (ESI)  $m/z$ :  $[M+H]^+$  Calcd for  $C_{28}H_{19}N_2O$  399.1492; Found 399.1503.

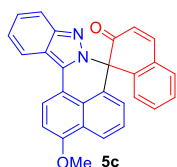

### 3-Methoxy-2'*H*-spiro[benzo[de]indazolo[3,2-*a*]isoquinoline-7,1'-naphthalen]-2'-one (5c)

Eluent: hexane/ethyl acetate (3:1). Yellow solid (29.5 mg, 71%), mp 278.9-279.8 °C.  $^1H$  NMR ( $CDCl_3$ , 400 MHz):  $\delta$  8.23 (dd,  $J_1 = 8.0$  Hz,  $J_2 = 1.6$  Hz, 1H), 8.15-8.13 (m, 2H), 7.66-7.63 (m, 1H), 7.57 (d,  $J = 8.8$  Hz, 1H), 7.42 (d,  $J = 7.6$  Hz, 1H), 7.31-7.17 (m, 3H), 7.15-7.09 (m, 3H), 6.92-6.90 (m, 1H), 6.82 (d,  $J = 8.0$  Hz, 1H), 6.12 (dd,  $J_1 = 10.0$  Hz,  $J_2 = 2.0$  Hz, 1H), 3.97 (d,  $J = 1.6$  Hz, 3H).  $^{13}C\{^1H\}$  NMR ( $CDCl_3$ , 100 MHz):  $\delta$  193.6, 155.6, 149.7, 146.9, 145.7, 132.4, 131.8, 131.3, 130.0, 129.8, 128.8, 128.7, 126.6, 126.0, 125.9, 125.5, 124.3, 122.7, 122.3, 121.9, 121.8, 121.3, 118.4, 117.4, 116.9, 104.7, 72.8, 55.8. HRMS (ESI)  $m/z$ :  $[M+H]^+$  Calcd for  $C_{28}H_{19}N_2O_2$  415.1441; Found 415.1440.

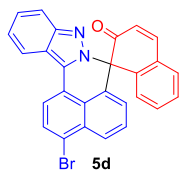

### 3-Bromo-2'*H*-spiro[benzo[de]indazolo[3,2-*a*]isoquinoline-7,1'-naphthalen]-2'-one (5d)

Eluent: hexane/ethyl acetate (4:1). Yellow solid (31.2 mg, 67%), mp >320 °C. <sup>1</sup>H NMR (CDCl<sub>3</sub>, 400 MHz): δ 8.24-8.21 (m, 3H), 7.97 (d, *J* = 8.0 Hz, 1H), 7.75 (d, *J* = 10.0 Hz, 1H), 7.68 (d, *J* = 8.8 Hz, 1H), 7.53 (d, *J* = 7.6 Hz, 1H), 7.49 (t, *J* = 7.6 Hz, 1H), 7.39 (td, *J*<sub>1</sub> = 7.6 Hz, *J*<sub>2</sub> = 0.8 Hz, 1H), 7.35-7.31 (m, 1H), 7.28-7.23 (m, 2H), 7.21 (d, *J* = 7.6 Hz, 1H), 6.89 (d, *J* = 7.6 Hz, 1H), 6.20 (d, *J* = 10.0 Hz, 1H). <sup>13</sup>C{<sup>1</sup>H} NMR (CDCl<sub>3</sub>, 100 MHz): δ 193.0, 149.8, 147.1, 145.2, 132.6, 132.3, 131.4, 131.3, 131.1, 130.1, 129.9, 129.0, 128.9, 127.9, 127.7, 126.8, 125.9, 124.3, 124.0, 123.3, 122.4, 121.5, 121.2, 121.0, 118.7, 118.2, 72.8. HRMS (ESI) *m/z*: [M+H]<sup>+</sup> Calcd for C<sub>27</sub>H<sub>16</sub>BrN<sub>2</sub>O 463.0441; Found 463.0445.

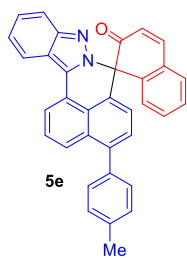

### 4-(*p*-Tolyl)-2'*H*-spiro[benzo[de]indazolo[3,2-*a*]isoquinoline-7,1'-naphthalen]-2'-one (5e)

Eluent: hexane/ethyl acetate (4:1). Yellow solid (32 mg, 67%), mp 285.0-286.2 °C. <sup>1</sup>H NMR (CDCl<sub>3</sub>, 400 MHz): δ 8.41 (d, *J* = 7.2 Hz, 1H), 8.28 (d, *J* = 8.4 Hz, 1H), 7.86 (d, *J* = 8.4 Hz, 1H), 7.73 (d, *J* = 10.0 Hz, 1H), 7.68 (d, *J* = 8.8 Hz, 1H), 7.61-7.57 (m, 1H), 7.51 (d, *J* = 7.6 Hz, 1H), 7.39-7.35 (m, 1H), 7.34-7.22 (m, 8H), 7.16 (d, *J* = 7.6 Hz, 1H), 6.97 (d, *J* = 7.6 Hz, 1H), 6.20 (d, *J* = 10.0 Hz, 1H), 2.44 (s, 3H). <sup>13</sup>C{<sup>1</sup>H} NMR (CDCl<sub>3</sub>, 100 MHz): δ 193.4, 149.8, 147.0, 145.5, 141.0, 137.5, 136.9, 132.2, 131.4, 130.9, 130.1, 129.93, 129.88, 129.2, 129.0, 128.9, 127.5, 126.9, 126.7, 126.6, 124.5, 124.2, 123.5, 122.9, 121.6, 121.25, 121.20, 118.6, 118.2, 73.2, 21.3. HRMS (ESI) *m/z*: [M+H]<sup>+</sup> Calcd for C<sub>34</sub>H<sub>23</sub>N<sub>2</sub>O 475.1805; Found 475.1795.

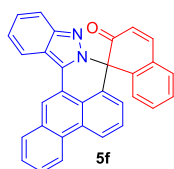

### 2'*H*-Spiro[dibenzo[de,g]indazolo[3,2-*a*]isoquinoline-8,1'-naphthalen]-2'-one (5f)

Eluent: hexane/ethyl acetate (3:1). Yellow solid (28.8 mg, 66%), mp >320 °C. <sup>1</sup>H NMR (CDCl<sub>3</sub>, 400 MHz): δ 8.57 (s, 1H), 8.55-8.49 (m, 2H), 8.34 (d, *J* = 8.4 Hz, 1H), 7.96-7.94 (m, 1H), 7.67 (d, *J* = 10.0 Hz, 1H), 7.62 (d, *J* = 8.8 Hz, 1H), 7.58-7.55 (m, 2H), 7.46-7.42 (m, 2H), 7.29-7.10 (m, 5H), 6.81 (d, *J* = 7.6 Hz, 1H), 6.16 (d, *J* = 10.0 Hz, 1H). <sup>13</sup>C{<sup>1</sup>H} NMR (CDCl<sub>3</sub>, 100 MHz): δ 193.6, 149.8, 147.0, 145.3, 132.6, 132.0, 131.8, 131.3, 131.1, 130.1, 129.9, 129.8, 129.2, 129.0, 128.9, 127.8, 127.4, 127.3, 126.8, 125.3, 123.2, 123.0, 122.9, 122.3, 122.0, 121.9, 121.3, 118.6, 118.2, 72.7. HRMS (ESI) *m/z*: [M+H]<sup>+</sup> Calcd for C<sub>31</sub>H<sub>19</sub>N<sub>2</sub>O 435.1492; Found 435.1484.

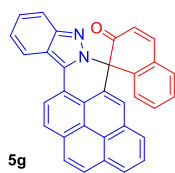

### 2'*H*-Spiro[indazolo[2,3-*b*]phenanthro[3,4,5-*defg*]isoquinoline-7,1'-naphthalen]-2'-one (5g)

Eluent: hexane/ethyl acetate (3:1). Yellow solid (25.6 mg, 56%), mp >320 °C. <sup>1</sup>H NMR (CDCl<sub>3</sub>, 400 MHz): δ 8.90 (d, *J* = 8.0 Hz, 1H), 8.41 (d, *J* = 8.4 Hz, 1H), 8.34 (d, *J* = 8.0 Hz, 1H), 8.14 (dd, *J*<sub>1</sub> = 7.2 Hz, *J*<sub>2</sub> = 1.2 Hz, 1H), 8.07-8.01 (m, 2H), 7.97-7.90 (m, 2H), 7.83 (d, *J* = 10.0 Hz, 1H), 7.72-7.70 (m, 2H), 7.60 (d, *J* = 7.6 Hz, 1H), 7.42 (td, *J*<sub>1</sub> = 7.6 Hz, *J*<sub>2</sub> = 1.2 Hz, 1H), 7.36-7.32 (m, 1H), 7.30-7.24 (m, 2H), 7.08 (d, *J* = 7.6 Hz, 1H), 6.24 (d, *J* = 10.0 Hz, 1H). <sup>13</sup>C{<sup>1</sup>H} NMR (CDCl<sub>3</sub>, 100 MHz): δ 193.0, 150.0, 147.0, 145.6, 132.8, 131.4, 131.3, 131.0, 130.5, 130.1, 130.0, 129.05, 128.98, 127.62, 127.58, 126.74, 126.67, 126.51, 126.46, 126.1, 125.6, 124.9, 124.1, 123.1, 121.8, 121.5, 121.3, 121.1, 120.3, 118.7, 118.5, 73.5. HRMS (ESI) *m/z*: [M+H]<sup>+</sup> Calcd for C<sub>33</sub>H<sub>19</sub>N<sub>2</sub>O 459.1492; Found 459.1503.

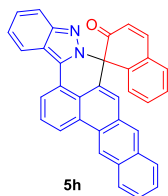

### 2'*H*-Spiro[benzo[de]indazolo[2,3-*b*]naphtho[2,3-*g*]isoquinoline-10,1'-naphthalen]-2'-one (5h)

Eluent: hexane/ethyl acetate (3:1). Yellow solid (32.9 mg, 68%), mp >320 °C. <sup>1</sup>H NMR (CDCl<sub>3</sub>, 400 MHz): δ 9.13 (s, 1H), 8.81 (d, *J* = 8.4 Hz, 1H), 8.55 (d, *J* = 7.6 Hz, 1H), 8.31 (d, *J* = 8.8 Hz, 1H), 8.19 (s, 1H), 8.10 (d, *J* =

7.6 Hz, 1H), 7.94 (d,  $J = 7.6$  Hz, 1H), 7.88 (t,  $J = 8.0$  Hz, 1H), 7.79 (d,  $J = 10.0$  Hz, 1H), 7.70 (d,  $J = 8.4$  Hz, 1H), 7.60-7.50 (m, 3H), 7.46-7.42 (m, 2H), 7.35-7.24 (m, 3H), 7.08 (d,  $J = 8.0$  Hz, 1H), 6.20 (d,  $J = 10.0$  Hz, 1H).  $^{13}\text{C}\{^1\text{H}\}$  NMR ( $\text{CDCl}_3$ , 150 MHz):  $\delta$  192.7, 149.8, 146.8, 145.0, 132.4, 132.3, 132.2, 131.44, 131.39, 130.1, 130.0, 129.8, 129.5, 129.3, 129.0, 128.6, 128.1, 127.8, 127.7, 127.6, 127.0, 126.7, 126.4, 125.1, 123.0, 122.3, 121.9, 121.51, 121.46, 121.2, 118.7, 118.4, 73.1. HRMS (ESI)  $m/z$ :  $[\text{M}+\text{H}]^+$  Calcd for  $\text{C}_{35}\text{H}_{21}\text{N}_2\text{O}$  485.1648; Found 485.1652.

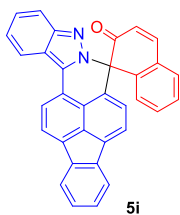

### **2'H-Spiro[fluoreno[2,1,9-def]indazolo[3,2-a]isoquinoline-7,1'-naphthalen]-2'-one (5i)**

Eluent: hexane/ethyl acetate (3:1). Yellow solid (38.2 mg, 83%), mp  $> 320$  °C.  $^1\text{H}$  NMR ( $\text{DMSO}-d_6$ , 400 MHz):  $\delta$  8.63 (d,  $J = 7.2$  Hz, 1H), 8.55 (d,  $J = 8.4$  Hz, 1H), 8.36 (d,  $J = 7.6$  Hz, 1H), 8.18-8.14 (m, 2H), 8.07 (d,  $J = 7.2$  Hz, 1H), 8.01 (d,  $J = 6.8$  Hz, 1H), 7.80 (d,  $J = 7.2$  Hz, 1H), 7.62 (d,  $J = 8.8$  Hz, 1H), 7.50-7.27 (m, 7H), 6.80 (d,  $J = 7.6$  Hz, 1H), 6.33 (d,  $J = 10.0$  Hz, 1H).  $^{13}\text{C}\{^1\text{H}\}$  NMR ( $\text{CDCl}_3$ , 150 MHz):  $\delta$  193.1, 149.5, 147.1, 144.8, 139.4, 139.1, 136.9, 136.2, 132.4, 132.3, 131.9, 131.4, 130.2, 129.4, 128.9, 128.8, 128.1, 127.9, 126.9, 125.3, 124.1, 123.3, 122.2, 122.0, 121.8, 121.6, 121.0, 120.8, 120.1, 118.7, 118.1, 74.0. HRMS (ESI)  $m/z$ :  $[\text{M}+\text{H}]^+$  Calcd for  $\text{C}_{33}\text{H}_{19}\text{N}_2\text{O}$  459.1492; Found 459.1501.

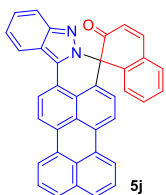

### **2'H-Spiro[benzo[10,5]anthra[2,1,9-def]indazolo[3,2-a]isoquinoline-6,1'-naphthalen]-2'-one (5j)**

Eluent: hexane/ethyl acetate (4:1). Red solid (25.0 mg, 49%), mp 251.1-252.6 °C.  $^1\text{H}$  NMR ( $\text{DMSO}-d_6$ , 400 MHz):  $\delta$  8.57 (s, 2H), 8.51 (d,  $J = 8.4$  Hz, 1H), 8.45 (d,  $J = 7.6$  Hz, 1H), 8.33 (d,  $J = 7.6$  Hz, 1H), 8.27 (d,  $J = 7.6$  Hz, 1H), 8.14 (d,  $J = 10.0$  Hz, 1H), 7.86-7.84 (m, 2H), 7.80 (d,  $J = 7.2$  Hz, 1H), 7.62-7.60 (m, 2H), 7.56-7.48 (m,

2H), 7.41-7.30 (m, 3H), 7.12 (d,  $J = 8.0$  Hz, 1H), 6.95 (d,  $J = 7.6$  Hz, 1H), 6.29 (d,  $J = 10.0$  Hz, 1H).  $^{13}\text{C}\{^1\text{H}\}$  NMR (DMSO- $d_6$ , 150 MHz):  $\delta$  193.8, 149.4, 148.7, 145.4, 134.6, 132.0, 131.7, 131.5, 131.3, 131.2, 130.9, 130.2, 129.83, 129.80, 129.6, 129.3, 129.2, 129.1, 128.5, 127.9, 127.7, 127.54, 127.50, 126.0, 124.1, 123.6, 122.8, 122.6, 122.4, 122.1, 122.0, 121.2, 118.3, 117.9, 72.8. HRMS (ESI)  $m/z$ :  $[\text{M}+\text{H}]^+$  Calcd for  $\text{C}_{37}\text{H}_{21}\text{N}_2\text{O}$  509.1648; Found 509.1642.

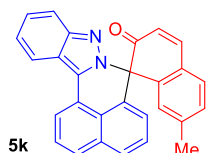

### 7'-Methyl-2'*H*-spiro[benzo[*de*]indazolo[3,2-*a*]isoquinoline-7,1'-naphthalen]-2'-one (5k)

Eluent: hexane/ethyl acetate (3:1). Yellow solid (36.3 mg, 91%), mp 265.6-266.3 °C.  $^1\text{H}$  NMR ( $\text{CDCl}_3$ , 400 MHz):  $\delta$  8.38 (d,  $J = 7.2$  Hz, 1H), 8.28 (d,  $J = 8.8$  Hz, 1H), 7.79-7.75 (m, 2H), 7.71-7.62 (m, 3H), 7.39-7.29 (m, 3H), 7.25-7.21 (m, 1H), 7.15-7.14 (m, 2H), 6.69 (s, 1H), 6.11 (d,  $J = 10.0$  Hz, 1H), 2.09 (s, 3H).  $^{13}\text{C}\{^1\text{H}\}$  NMR ( $\text{CDCl}_3$ , 100 MHz):  $\delta$  193.4, 149.7, 147.1, 145.6, 142.1, 133.8, 132.14, 132.10, 130.4, 130.1, 129.8, 128.4, 128.1, 127.0, 126.62, 126.57, 126.4, 124.9, 124.1, 123.1, 122.9, 121.2, 121.1, 120.4, 118.7, 118.1, 73.2, 21.6. HRMS (ESI)  $m/z$ :  $[\text{M}+\text{H}]^+$  Calcd for  $\text{C}_{28}\text{H}_{19}\text{N}_2\text{O}$  399.1492; Found 399.1497.

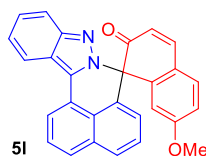

### 7'-Methoxy-2'*H*-spiro[benzo[*de*]indazolo[3,2-*a*]isoquinoline-7,1'-naphthalen]-2'-one (5l)

Eluent: hexane/ethyl acetate (4:1). Yellow solid (36.8 mg, 89%), mp 252.6-253.0 °C.  $^1\text{H}$  NMR ( $\text{CDCl}_3$ , 400 MHz):  $\delta$  8.37 (d,  $J = 7.2$  Hz, 1H), 8.27 (d,  $J = 8.8$  Hz, 1H), 7.80-7.76 (m, 2H), 7.70-7.63 (m, 3H), 7.43 (d,  $J = 8.4$  Hz, 1H), 7.36 (t,  $J = 8.0$  Hz, 1H), 7.33-7.29 (m, 1H), 7.25-7.21 (m, 1H), 7.18 (d,  $J = 7.2$  Hz, 1H), 6.86 (dd,  $J_1 = 8.4$  Hz,  $J_2 = 2.4$  Hz, 1H), 6.41 (d,  $J = 2.4$  Hz, 1H), 6.05 (d,  $J = 10.0$  Hz, 1H), 3.54 (s, 3H).  $^{13}\text{C}\{^1\text{H}\}$  NMR ( $\text{CDCl}_3$ , 100 MHz):  $\delta$  193.3, 162.1, 149.7, 147.7, 146.9, 133.8, 132.1, 131.8, 128.4, 128.0, 127.0, 126.64, 126.56, 124.7,

124.0, 123.1, 122.9, 122.2, 121.2, 121.1, 118.8, 118.6, 118.1, 116.1, 113.9, 73.3, 55.4. HRMS (ESI)  $m/z$ :

$[M+H]^+$  Calcd for  $C_{28}H_{19}N_2O_2$  415.1441; Found 415.1450.

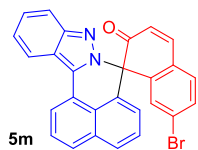

### 7'-Bromo-2'*H*-spiro[benzo[de]indazolo[3,2-*a*]isoquinoline-7,1'-naphthalen]-2'-one (5m)

Eluent: hexane/ethyl acetate (4:1). Yellow solid (32.9 mg, 71%), mp 294.7-295.5 °C.  $^1H$  NMR ( $CDCl_3$ , 400 MHz):  $\delta$  8.40 (d,  $J = 7.2$  Hz, 1H), 8.28 (d,  $J = 8.4$  Hz, 1H), 7.83-7.80 (m, 2H), 7.70-7.66 (m, 3H), 7.52-7.50 (m, 1H), 7.40-7.33 (m, 3H), 7.28-7.25 (m, 1H), 7.13 (d,  $J = 7.6$  Hz, 1H), 7.04 (s, 1H), 6.20 (dd,  $J_1 = 10.0$  Hz,  $J_2 = 1.6$  Hz, 1H).  $^{13}C\{^1H\}$  NMR ( $CDCl_3$ , 100 MHz):  $\delta$  192.3, 149.8, 147.0, 145.7, 133.8, 132.9, 132.3, 132.1, 131.2, 131.1, 128.8, 128.2, 128.0, 127.1, 126.9, 126.5, 126.0, 124.9, 123.8, 123.1, 123.0, 121.8, 121.4, 121.2, 118.6, 118.1, 72.7. HRMS (ESI)  $m/z$ :  $[M+H]^+$  Calcd for  $C_{27}H_{16}BrN_2O$  463.0441; Found 463.0429.

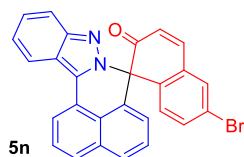

### 6'-Bromo-2'*H*-spiro[benzo[de]indazolo[3,2-*a*]isoquinoline-7,1'-naphthalen]-2'-one (5n)

Eluent: hexane/ethyl acetate (5:1). Yellow solid (29.5 mg, 64%), mp 154.7-156.0 °C.  $^1H$  NMR ( $CDCl_3$ , 400 MHz):  $\delta$  8.39-8.37 (m, 1H), 8.26 (d,  $J = 8.4$  Hz, 1H), 7.81-7.78 (m, 2H), 7.68-7.62 (m, 4H), 7.39-7.30 (m, 3H), 7.26-7.22 (m, 1H), 7.12 (dd,  $J_1 = 7.6$  Hz,  $J_2 = 0.8$  Hz, 1H), 6.79 (d,  $J = 8.4$  Hz, 1H), 6.21 (d,  $J = 10.0$  Hz, 1H).  $^{13}C\{^1H\}$  NMR ( $CDCl_3$ , 100 MHz):  $\delta$  192.5, 149.8, 145.2, 144.1, 134.0, 133.8, 132.4, 132.1, 131.5, 131.3, 130.8, 128.8, 128.2, 127.1, 126.9, 126.5, 124.9, 123.8, 123.11, 123.05, 122.8, 122.7, 121.3, 121.2, 118.5, 118.1, 72.8. HRMS (ESI)  $m/z$ :  $[M+H]^+$  Calcd for  $C_{27}H_{16}BrN_2O$  463.0441; Found 463.0445.

### 3. Gram-scale synthesis of 3a

To a reaction tube equipped with a stir bar were charged with **1a** (732.9 mg, 3 mmol), HFIP (30 mL),  $[IrCp^*Cl_2]_2$  (35.9 mg, 0.045 mmol),  $Cs_2CO_3$  (293.2 mg, 0.9 mmol),  $Ag_2O$  (347.6 mg, 1.5 mmol) and **2a** (603.6

mg, 3 mmol). The tube was then sealed, and the resulting mixture was stirred at 100 °C under air for 6 h. Upon completion, it was cooled to room temperature, filtered through a pad of celite, and concentrated under reduced pressure. The residue was purified by silica gel column chromatography using hexane/ethyl acetate (5:1) as eluent to afford **3a** (0.875 g, 70%).

#### 4. Structural elaborations of **3a**

##### 4.1 Synthesis of **6**<sup>[4]</sup>

To a two-necked flask equipped with a stir bar were charged with LiAlH<sub>4</sub> (30.4 mg, 0.8 mmol), AlCl<sub>3</sub> (106.7 mg, 0.8 mmol) and Et<sub>2</sub>O (2 mL). The resulting mixture was stirred at 0 °C for 0.5 h. Then, a solution of **3a** (41.5 mg, 0.1 mmol) in Et<sub>2</sub>O and chloroform (1:2 (v/v), 3 mL) was added in a dropwise manner. The resulting mixture was then stirred at 0 °C for 1 h. Upon completion, it was warmed to room temperature, quenched with H<sub>2</sub>O, and extracted with DCM (10 mL × 3). The combined organic layers were dried over anhydrous Na<sub>2</sub>SO<sub>4</sub>, filtered through a pad of celite, and concentrated under reduced pressure. The residue was purified by silica gel column chromatography with hexane/ethyl acetate (3:1) as eluent to afford **6**.

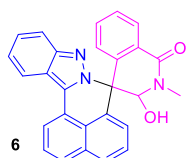

##### **3'-Hydroxy-2'-methyl-2',3'-dihydro-1'*H*-spiro[benzo[de]indazolo[3,2-*a*]isoquinoline-7,4'-isoquinolin]-1'-one (6)**

Eluent: hexane/ethyl acetate (3:1). White solid (16.4 mg, 39%), mp 173.6-174.2 °C. <sup>1</sup>H NMR (DMSO-*d*<sub>6</sub>, 400 MHz): δ 8.52 (d, *J* = 7.6 Hz, 1H), 8.47 (d, *J* = 8.0 Hz, 1H), 8.18 (d, *J* = 7.6 Hz, 1H), 8.00-7.98 (m, 2H), 7.75 (t, *J* = 7.6 Hz, 1H), 7.65 (d, *J* = 8.4 Hz, 1H), 7.58-7.52 (m, 2H), 7.47-7.44 (m, 1H), 7.39-7.35 (m, 1H), 7.29-7.26 (m, 1H), 7.12 (d, *J* = 7.2 Hz, 1H), 6.96 (d, *J* = 6.4 Hz, 1H), 6.86 (d, *J* = 8.0 Hz, 1H), 5.81 (d, *J* = 6.4 Hz, 1H), 2.83 (s, 3H). <sup>13</sup>C {<sup>1</sup>H} NMR (DMSO-*d*<sub>6</sub>, 150 MHz): δ 163.8, 148.7, 141.0, 133.3, 133.0, 132.1, 130.6, 129.1, 129.0, 128.7, 128.5, 128.4, 128.2, 128.0, 127.13, 127.05, 126.7, 125.1, 123.6, 123.3, 122.0, 121.3, 118.5, 118.0, 86.4, 72.0, 29.3. HRMS (ESI) *m/z*: [M+Na]<sup>+</sup> Calcd for C<sub>27</sub>H<sub>19</sub>N<sub>3</sub>NaO<sub>2</sub> 440.1369; Found 440.1359.

## 4.2 Synthesis of 7

To a flask equipped with a stir bar were charged with **3a** (41.5 mg, 0.1 mmol), *m*-CPBA (25.9 mg, 0.15 mmol) and DCM (2 mL). The resulting mixture was stirred under reflux for 7 h. Upon completion, it was cooled to room temperature, quenched with saturated aqueous Na<sub>2</sub>CO<sub>3</sub>, and extracted with DCM (10 mL × 3). The combined organic layers were dried over anhydrous Na<sub>2</sub>SO<sub>4</sub>, filtered through a pad of celite, and concentrated under reduced pressure. The residue was purified by silica gel column chromatography using hexane/ethyl acetate (3:1) as eluent to afford **7**.

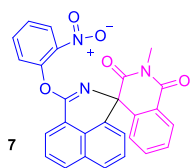

### **2'-Methyl-3-(2-nitrophenoxy)-1'*H*-spiro[benzo[de]isoquinoline-1,4'-isoquinoline]-1',3'(2'*H*)-dione (7)**

Eluent: hexane/ethyl acetate (3:1). White solid (27.5 mg, 59%), mp 89.1-90.4 °C. <sup>1</sup>H NMR (DMSO-*d*<sub>6</sub>, 400 MHz): δ 8.33 (d, *J* = 7.2 Hz, 1H), 8.29 (d, *J* = 8.0 Hz, 1H), 8.15 (dd, *J*<sub>1</sub> = 7.6 Hz, *J*<sub>2</sub> = 1.2 Hz, 1H), 8.06 (dd, *J*<sub>1</sub> = 8.4 Hz, *J*<sub>2</sub> = 1.6 Hz, 1H), 7.99 (d, *J* = 8.0 Hz, 1H), 7.85-7.77 (m, 2H), 7.64-7.53 (m, 3H), 7.51-7.44 (m, 2H), 6.98-6.95 (m, 2H), 3.15 (s, 3H). <sup>13</sup>C{<sup>1</sup>H} NMR (CDCl<sub>3</sub>, 150 MHz): δ 170.9, 164.5, 160.8, 146.3, 142.7, 142.6, 134.7, 134.6, 133.5, 132.6, 132.3, 128.6, 128.3, 127.9, 127.6, 127.5, 126.7, 126.6, 125.9, 125.8, 125.6, 125.2, 124.2, 123.5, 118.5, 68.8, 27.7. HRMS (ESI) *m/z*: [M+H]<sup>+</sup> Calcd for C<sub>27</sub>H<sub>18</sub>N<sub>3</sub>O<sub>5</sub> 464.1241; Found 464.1245.

## 5. Cell anti-proliferative activity assay

Cell anti-proliferative activity against HeLa, HCT-116, MDA-MB-231, HepG2 and HaCat was evaluated by the CCK-8 method.

Dilute HeLa or HCT-116 cell suspensions in growth medium to desired density and 100 μL were taken to 96-well plate. The test compounds with different concentration gradients were prepared. Add 100 μL culture medium containing compounds into 96-well plate according to the plate map. Final DMSO concentration in each well was below 0.1%. Then the cell was incubated at 37 °C, 5% CO<sub>2</sub> for 48 h. Equilibrate the assay plate to room temperature before measurement. Add 10 μL of CCK-8 into each well. Mix contents for 2 minutes on an orbital

shaker to induce cell lysis. Incubate at 37 °C and 5% CO<sub>2</sub> for 1.5 hours, and then the plates were recorded by measuring absorbance at 450 nm using an EnVision Multilabel Reader (PerkinElmer). The IC<sub>50</sub> values were calculated using GraphPad Prism 6.0 software and determined by the concentration causing a half-maximal percent activity.

Dilute MDA-MB-231 or HepG2 cell suspensions in growth medium to desired density and 100 µL were taken to 96-well plate. The test compounds with different concentration gradients were prepared. Add 100 µL culture medium containing compounds into 96-well plate according to the plate map. Final DMSO concentration in each well was below 0.1%. Then the cell was incubated at 37 °C, 5% CO<sub>2</sub> for 96 h. Equilibrate the assay plate to room temperature before measurement. Add 10 µL of CCK-8 into each well. Mix contents for 2 minutes on an orbital shaker to induce cell lysis. Incubate at 37 °C and 5% CO<sub>2</sub> for 1.5 hours, and then the plates were recorded by measuring absorbance at 450 nm using an EnVision Multilabel Reader (PerkinElmer). The IC<sub>50</sub> values were calculated using GraphPad Prism 6.0 software and determined by the concentration causing a half-maximal percent activity.

Dilute HaCat cell suspensions in growth medium to desired density and 100 µL were taken to 96-well plate. The test compounds with different concentration gradients were prepared. Add 100 µL culture medium containing compounds into 96-well plate according to the plate map. Final DMSO concentration in each well was below 0.1%. Then the cell was incubated at 37 °C, 5% CO<sub>2</sub> for 72 h. Equilibrate the assay plate to room temperature before measurement. Add 10 µL of CCK-8 into each well. Mix contents for 2 minutes on an orbital shaker to induce cell lysis. Incubate at 37 °C and 5% CO<sub>2</sub> for 1.5 hours, and then the plates were recorded by measuring absorbance at 450 nm using an EnVision Multilabel Reader (PerkinElmer). The IC<sub>50</sub> values were calculated using GraphPad Prism 6.0 software and determined by the concentration causing a half-maximal percent activity.

All assays were conducted with two parallel samples and two repetitions, and 5-fluorouracil was used as the positive control. The results thus obtained were included in the Table S1. The representative microscopy images and corresponding cell viability curve for compound **3o** were shown as Figure S1 and Figure S2, respectively.

**Table S1.** Antiproliferative Activity of Selected Products

| Compounds   | IC <sub>50</sub> (μM ± SD) |              |            |            |            |
|-------------|----------------------------|--------------|------------|------------|------------|
|             | Hela                       | HCT-116      | MDA-MB-231 | HepG2      | HaCat      |
| <b>3o</b>   | 10.27 ± 0.05               | >50          | 15.40±0.20 | >50        | 7.615±0.04 |
| <b>3r</b>   | 10.74 ± 0.46               | 21.35 ± 0.09 | >50        | >50        | >50        |
| <b>3s</b>   | 24.47 ± 0.48               | >50          | 34.68±0.09 | 13.29±0.05 | 18.01±0.02 |
| <b>3t</b>   | 12.08 ± 0.36               | 21.83 ± 0.28 | 21.76±0.40 | 11.80±0.11 | 24.61±0.16 |
| <b>5i</b>   | >50                        | 7.385 ± 0.06 | 11.21±0.02 | 13.60±0.21 | 23.70±0.42 |
| <b>6</b>    | 10.61 ± 0.17               | 20.52 ± 0.02 | >50        | 44.48±0.09 | 28.29±0.40 |
| <b>7</b>    | 6.438 ± 0.15               | 5.192 ± 0.05 | >50        | >50        | 7.615±0.04 |
| <b>5-FU</b> | 6.247 ± 0.12               | 6.202 ± 0.19 | 4.951±0.14 | 3.717±0.09 | 3.304±0.00 |

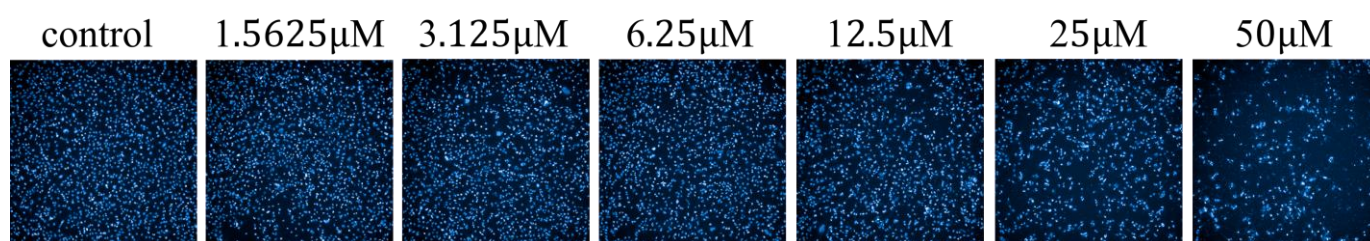

**Figure S1** Hoechst staining of MDA-MB-231 cells exposed to various concentrations of **3o** (control, 1.5625, 3.125, 6.25, 12.5, 25, and 50 μM) for 96 h.

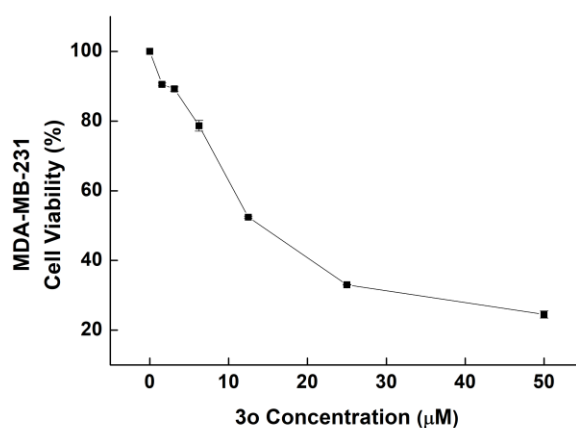

**Figure S2** Viability of MDA-MB-231 cells exposed to various concentrations of **3o** (control, 1.5625, 3.125, 6.25, 12.5, 25, and 50 μM) for 96 h.

### III. Mechanism studies

#### 1. H/D exchange experiment

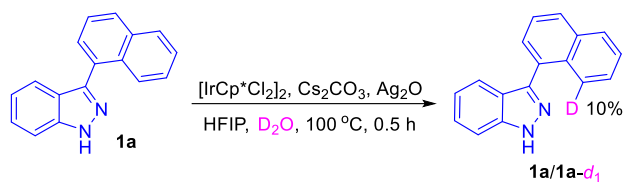

To a reaction tube equipped with a stir bar were charged with **1a** (24.4 mg, 0.1 mmol), HFIP (1 mL), D<sub>2</sub>O (18 μL, 1 mmol), [IrCp\*Cl<sub>2</sub>]<sub>2</sub> (1.2 mg, 0.0015 mmol), Cs<sub>2</sub>CO<sub>3</sub> (9.8 mg, 0.03 mmol), and Ag<sub>2</sub>O (11.6 mg, 0.05 mmol). The tube was then sealed and the mixture was stirred at 100 °C for 0.5 h. Afterwards, it was cooled to room temperature, filtered through a pad of celite and concentrated under reduced pressure. The residue was purified by silica gel column chromatography using hexane/ethyl acetate (5:1) as eluent to give a mixture of **1a** and **1a-*d*<sub>1</sub>**. Upon analyzing the <sup>1</sup>H NMR spectrum of the mixture, the deuteration percentage on the *ortho*-positions of the phenyl ring of **1a** was determined to be 10%. This result confirms the occurrence of a reversible C–H bond metalation/activation.

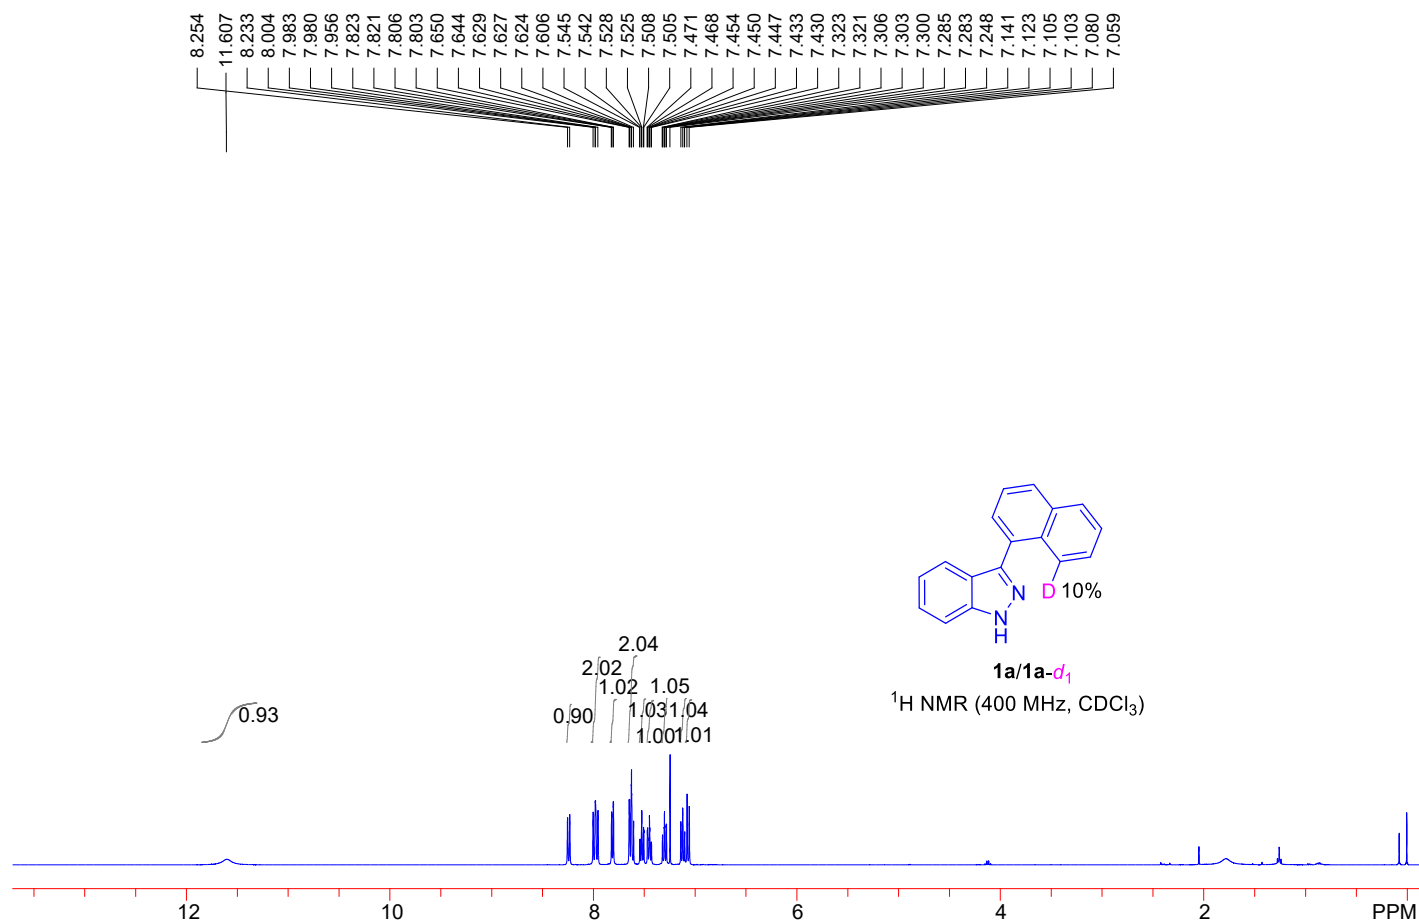

## 2. Kinetic isotope effect study

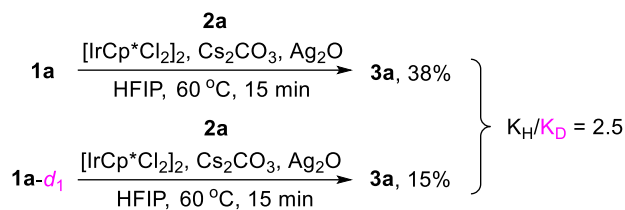

To a reaction tube equipped with a stir bar were charged with **1a** (24.4 mg, 0.1 mmol), HFIP (1 mL),  $[\text{IrCp}^*\text{Cl}_2]_2$  (1.2 mg, 0.0015 mmol),  $\text{Cs}_2\text{CO}_3$  (9.8 mg, 0.03 mmol),  $\text{Ag}_2\text{O}$  (11.6 mg, 0.05 mmol) and **2a** (20.1 mg, 0.1 mmol). The tube was then sealed, and the resulting mixture was stirred at 60 °C under air for 15 min. Afterwards, it was cooled to room temperature, filtered through a pad of celite, and concentrated under reduced pressure. The residue was purified by silica gel column chromatography using hexane/ethyl acetate (5:1) as eluent to afford **3a** (15.6 mg, 38%).

To a reaction tube equipped with a stir bar were charged with **1a-d<sub>1</sub>** (24.5 mg, 0.1 mmol), HFIP (1 mL),  $[\text{IrCp}^*\text{Cl}_2]_2$  (1.2 mg, 0.0015 mmol),  $\text{Cs}_2\text{CO}_3$  (9.8 mg, 0.03 mmol),  $\text{Ag}_2\text{O}$  (11.6 mg, 0.05 mmol) and **2a** (20.1 mg, 0.1 mmol). The tube was then sealed, and the resulting mixture was stirred at 60 °C under air for 15 min. Afterwards, it was cooled to room temperature, filtered through a pad of celite and concentrated under reduced pressure. The residue was purified by silica gel column chromatography using hexane/ethyl acetate (5:1) as eluent to afford **3a** (6.4 mg, 15%).

Based on these results, a kinetic isotope effect (KIE) value of 2.5 was obtained, indicating that the C–H bond cleavage process is most likely involved in the rate-determining step(s).

## 3. Electronic competition experiment

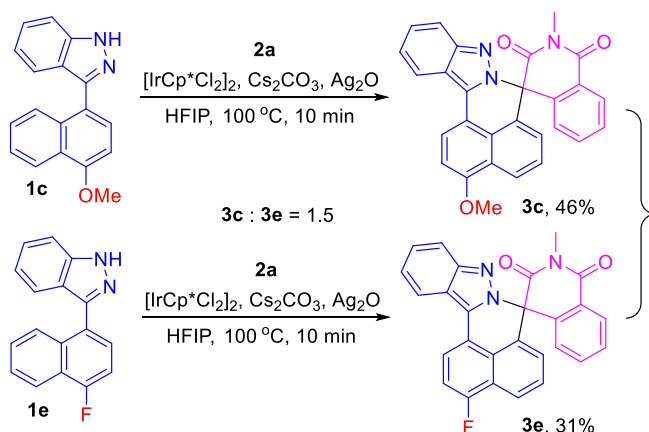

To a reaction tube equipped with a stir bar were added **1c** (27.4 mg, 0.1 mmol), HFIP (1 mL), [IrCp\*Cl<sub>2</sub>]<sub>2</sub> (1.2 mg, 0.0015 mmol), Cs<sub>2</sub>CO<sub>3</sub> (9.8 mg, 0.03 mmol), Ag<sub>2</sub>O (11.6 mg, 0.05 mmol) and **2a** (20.1 mg, 0.1 mmol). The tube was then sealed, and the resulting mixture was stirred at 100 °C under air for 10 min. Afterwards, it was cooled to room temperature, filtered through a pad of celite, and concentrated under reduced pressure. The residue was purified by silica gel column chromatography using hexane/ethyl acetate (5:1) as eluent to afford **3c** (20.3 mg, 46%).

To a reaction tube equipped with a stir bar were added **1e** (26.2 mg, 0.1 mmol), HFIP (1 mL), [IrCp\*Cl<sub>2</sub>]<sub>2</sub> (1.2 mg, 0.0015 mmol), Cs<sub>2</sub>CO<sub>3</sub> (9.8 mg, 0.03 mmol), Ag<sub>2</sub>O (11.6 mg, 0.05 mmol) and **2a** (20.1 mg, 0.1 mmol). The tube was then sealed, and the resulting mixture was stirred at 100 °C under air for 10 min. Afterwards, it was cooled to room temperature, filtered through a pad of celite, and concentrated under reduced pressure. The residue was purified by silica gel column chromatography using hexane/ethyl acetate (5:1) as eluent to afford **3e** (13.6 mg, 31%).

The above-described electronic competing experiments showed that an electron-donating methoxy group substituted substrate **1c** reacted with **2a** 1.5 times faster than an electron-withdrawing fluoro group substituted substrate **1e**. This result likely suggests an electrophilic C–H bond activation process.

#### 4. Proposed mechanism for the formation of **3a**

Based on the above mentioned preliminary mechanistic studies, a tentative pathway accounting for the formation of **3a** was proposed as follows. Initially, Ir(III) reacts with **1a** to furnish a five-membered iridacycle species **I** via C–H/N–H bond metalation. The following reaction of intermediate **I** with **2a** gives a carbene intermediate **II** through an extrusion of N<sub>2</sub>. Next,  $\alpha$ -migratory insertion occurs with **II** to deliver intermediate **III**. The subsequent reductive elimination occurs with **III** to release product **3a**. Meanwhile, the *in situ* generated Ir(I) species is oxidized back to Ir(III) by Ag(I) and O<sub>2</sub> to complete the catalytic cycle. By the way, the formation of product **5a** from the reaction of **1a** with **4a** should follow a similar pathway.

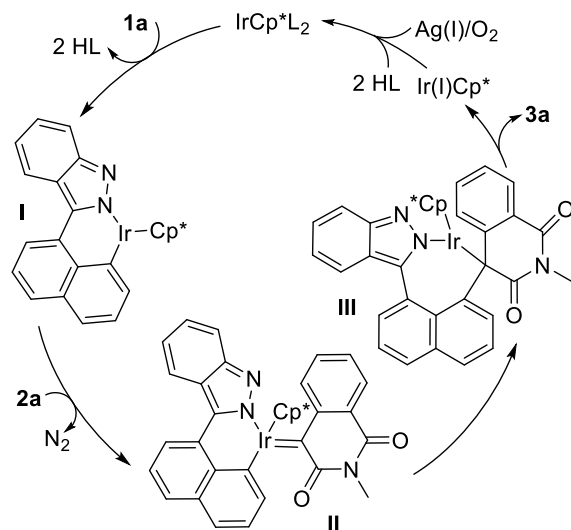

Plausible Mechanism Accounting for the Formation of **3a**

## IV. NMR spectra of 3a-3gg

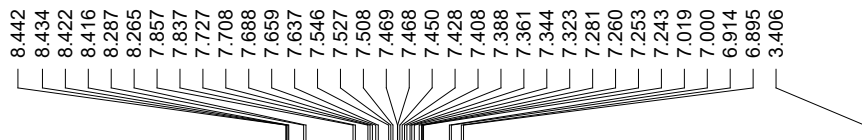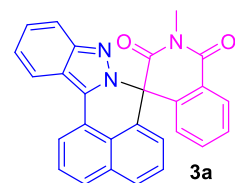

$^1\text{H}$  NMR ( $\text{CDCl}_3$ , 400 MHz)

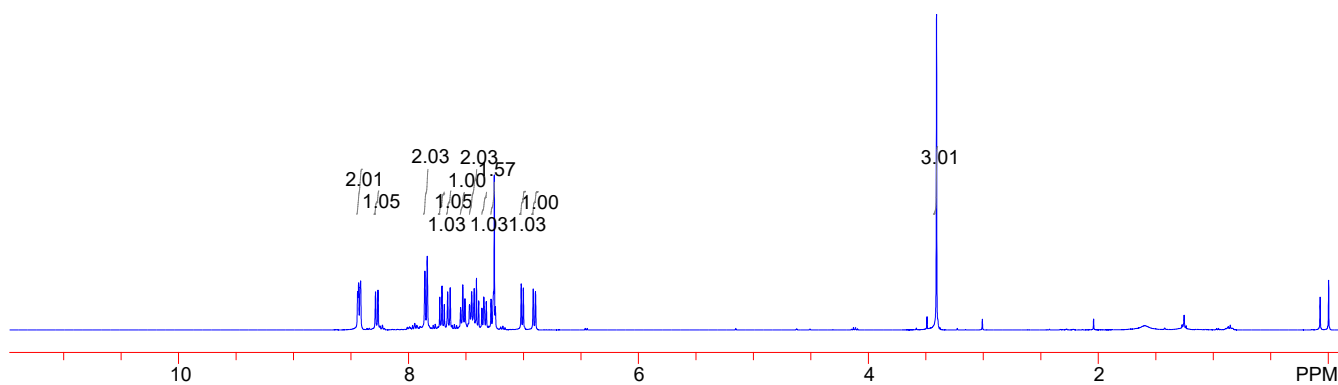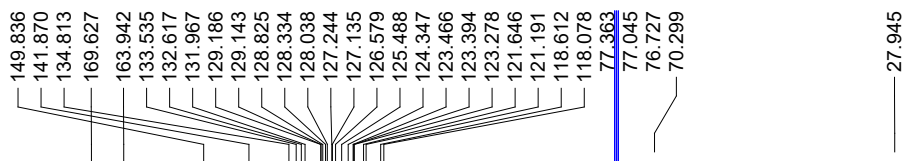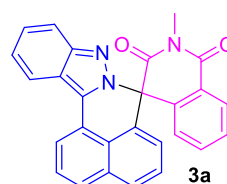

$^{13}\text{C}\{^1\text{H}\}$  NMR ( $\text{CDCl}_3$ , 100 MHz)

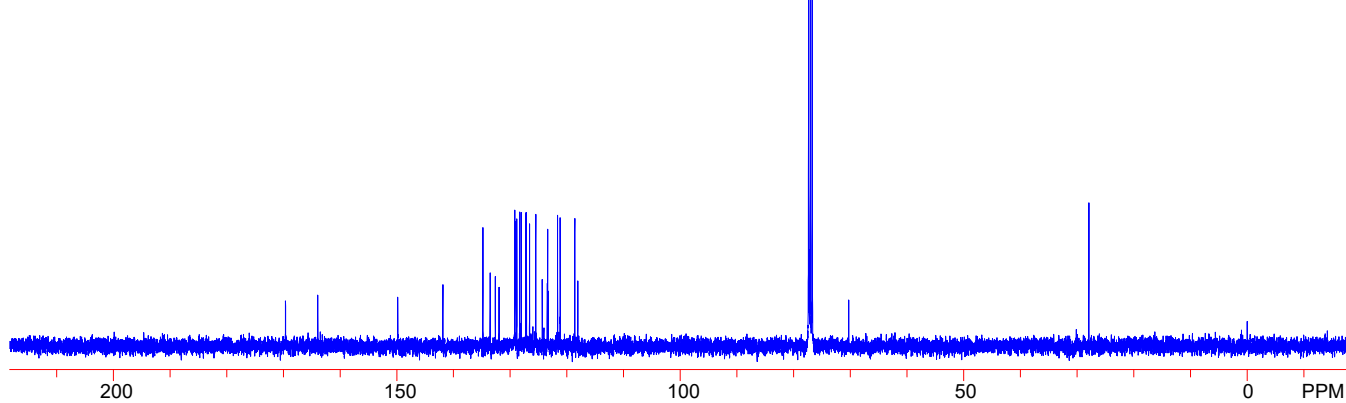

8.433  
8.414  
8.325  
8.307  
8.256  
8.235  
8.009  
7.988  
7.640  
7.618  
7.539  
7.522  
7.506  
7.487  
7.454  
7.442  
7.435  
7.423  
7.415  
7.405  
7.338  
7.322  
7.300  
7.242  
7.222  
7.220  
7.204  
7.029  
7.010  
6.896  
6.877  
3.400  
2.716

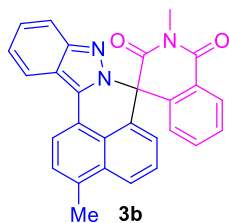

$^1\text{H NMR}$  ( $\text{CDCl}_3$ , 400 MHz)

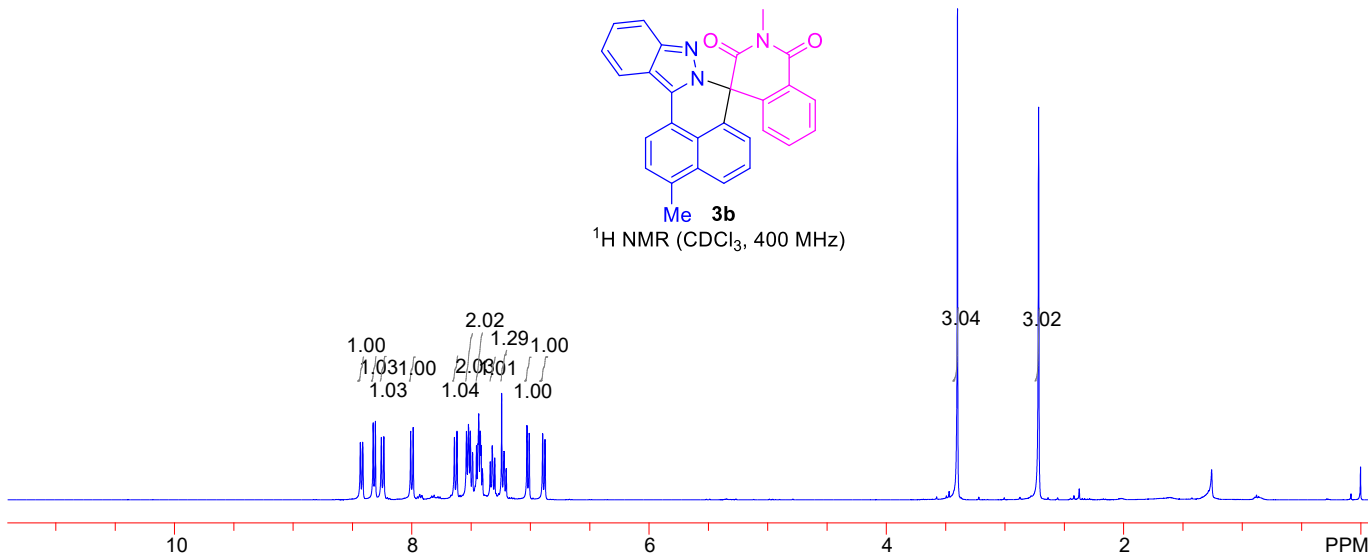

169.699  
163.971  
149.872  
141.971  
135.347  
134.799  
133.051  
132.841  
132.227  
129.114  
128.804  
128.060  
127.879  
127.092  
126.384  
125.459  
125.329  
124.391  
123.444  
123.083  
121.783  
121.610  
121.314  
118.497  
117.847  
77.399  
77.081  
76.764  
70.212  
27.938  
19.841

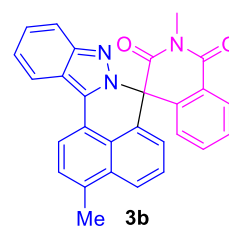

$^{13}\text{C}\{^1\text{H}\}$  NMR ( $\text{CDCl}_3$ , 100 MHz)

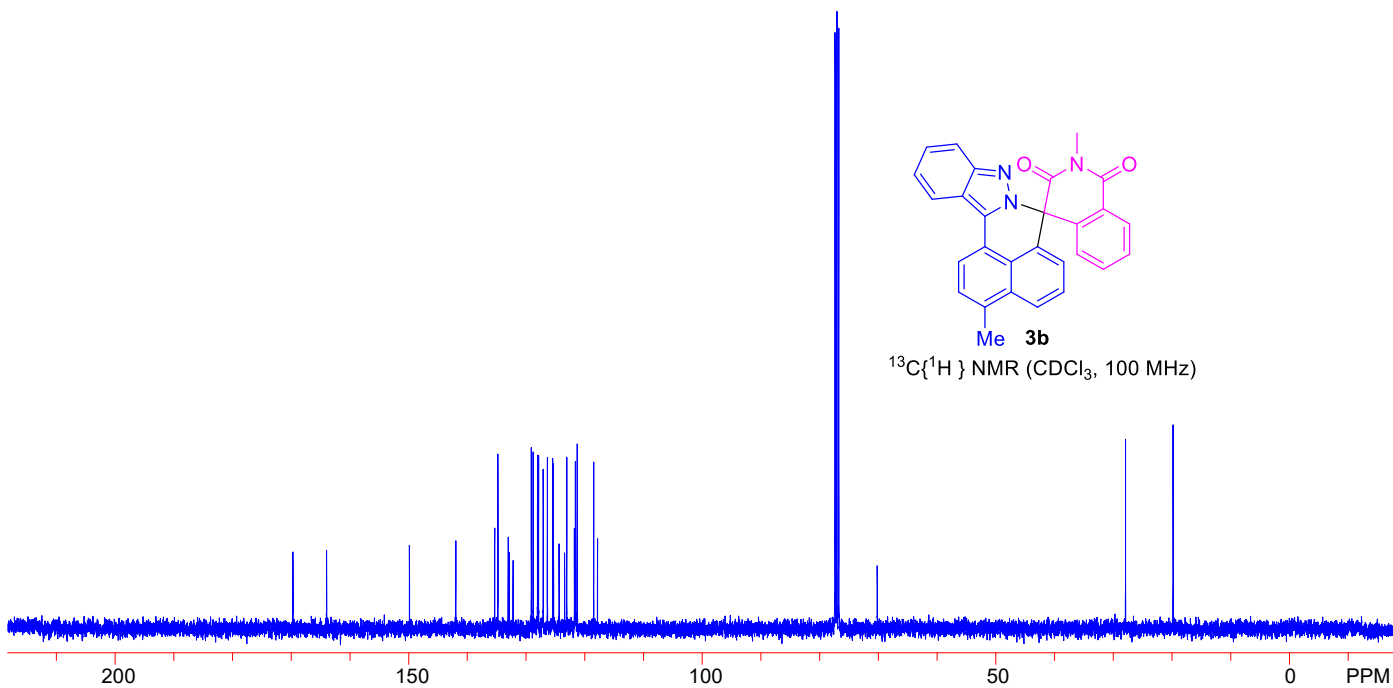

8.426  
8.406  
8.346  
8.326  
8.288  
8.268  
8.216  
8.195  
7.625  
7.603  
7.520  
7.501  
7.483  
7.443  
7.424  
7.414  
7.405  
7.395  
7.375  
7.328  
7.311  
7.289  
7.247  
7.213  
7.193  
7.175  
7.038  
7.020  
6.999  
6.900  
6.881  
4.055  
3.403

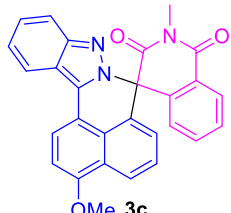

<sup>1</sup>H NMR (CDCl<sub>3</sub>, 400 MHz)

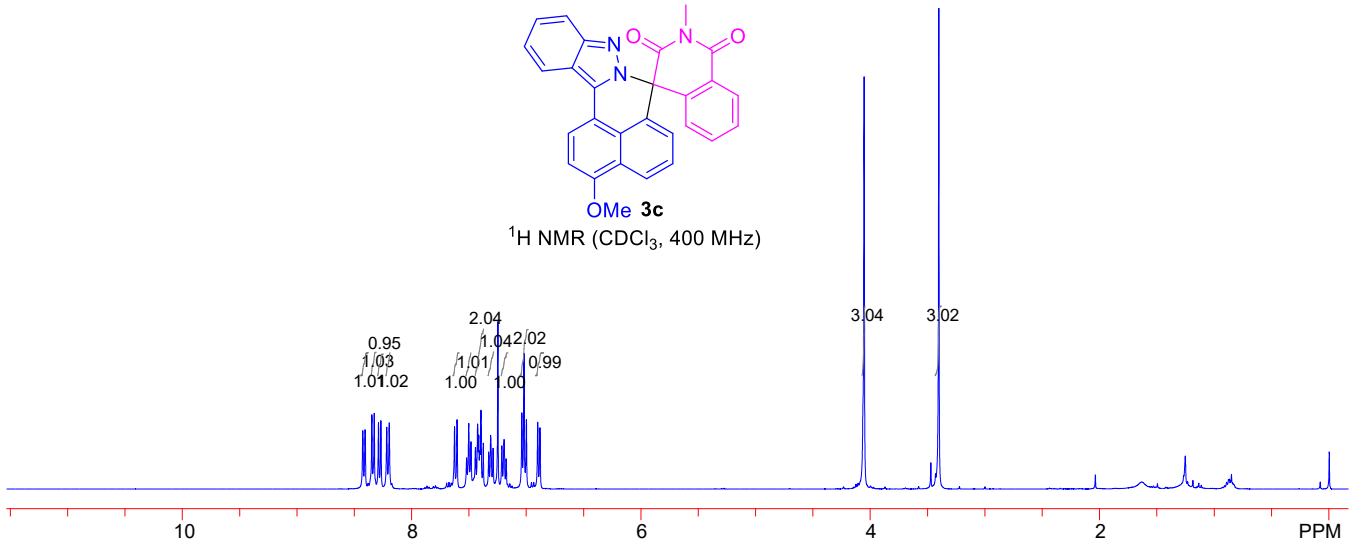

163.993  
155.773  
149.836  
169.793  
141.964  
134.777  
132.422  
132.307  
129.071  
128.789  
128.052  
127.049  
126.124  
125.987  
125.857  
124.412  
124.340  
123.466  
122.700  
122.527  
121.292  
118.374  
117.319  
116.265  
104.932  
77.385  
77.067  
76.749  
70.039  
55.904  
27.930

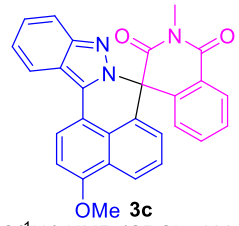

<sup>13</sup>C{<sup>1</sup>H} NMR (CDCl<sub>3</sub>, 100 MHz)

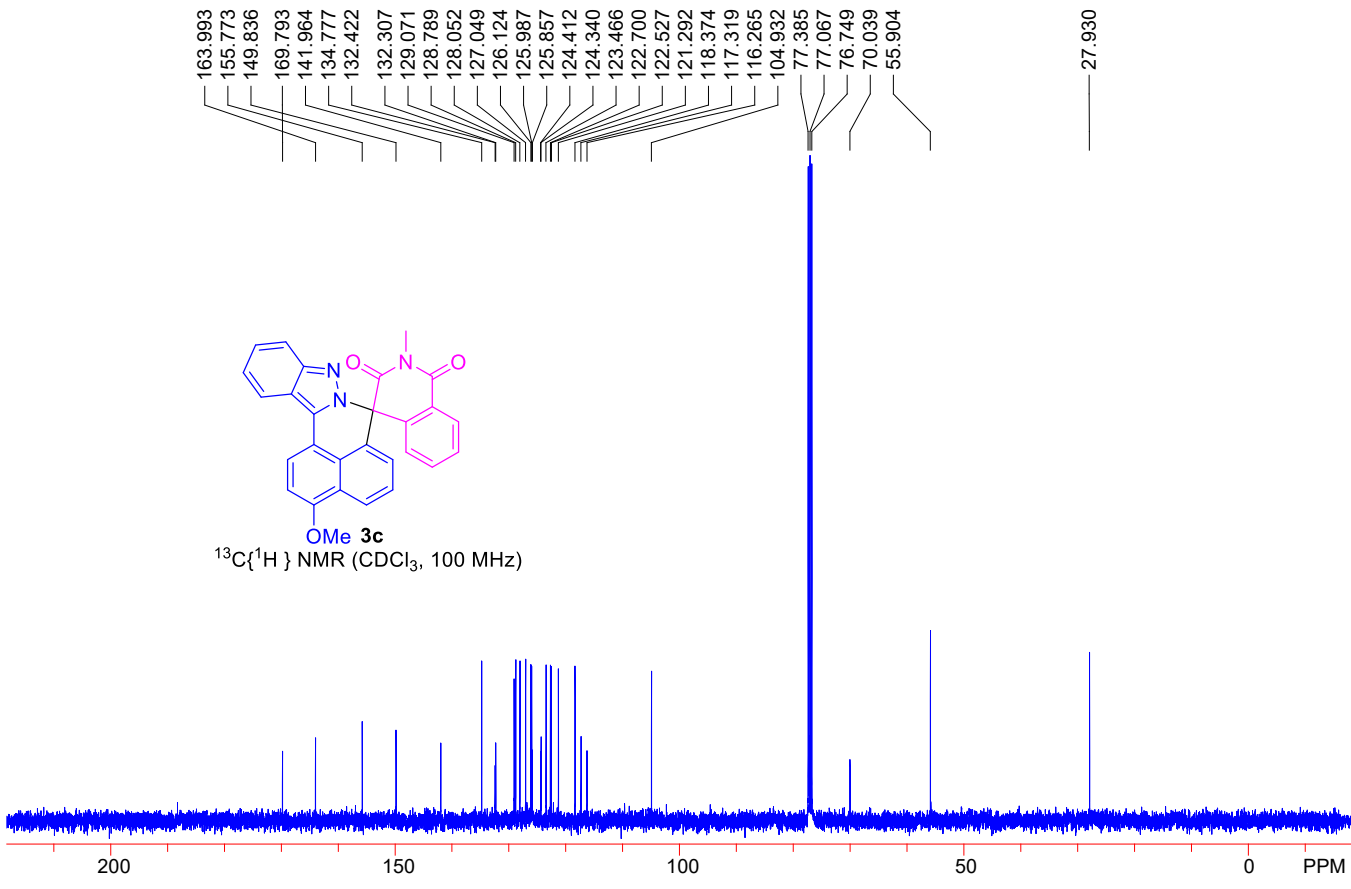

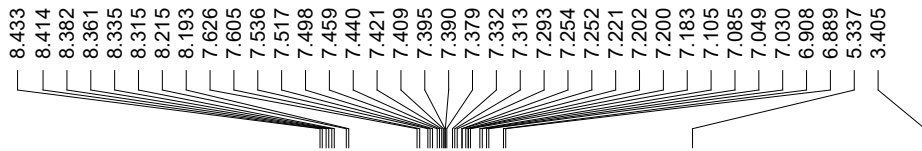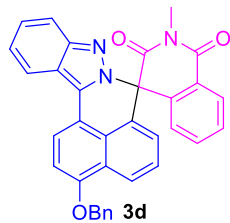

<sup>1</sup>H NMR (CDCl<sub>3</sub>, 400 MHz)

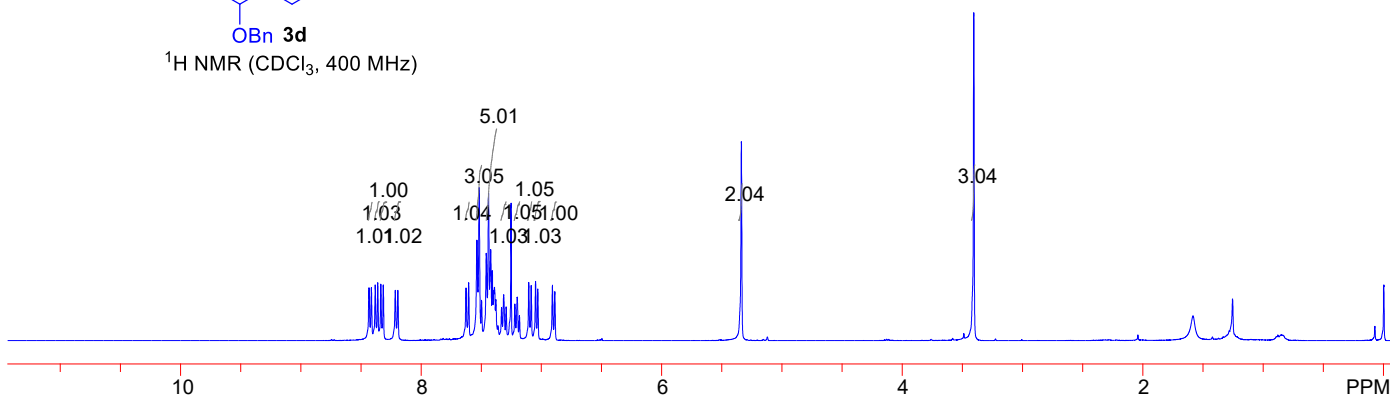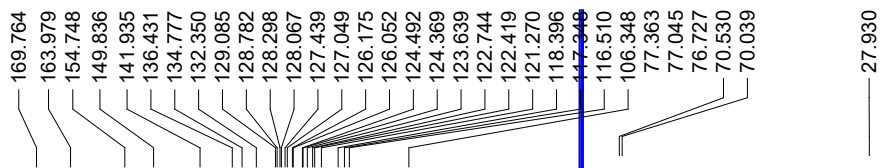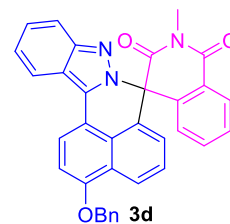

<sup>13</sup>C{<sup>1</sup>H} NMR (CDCl<sub>3</sub>, 100 MHz)

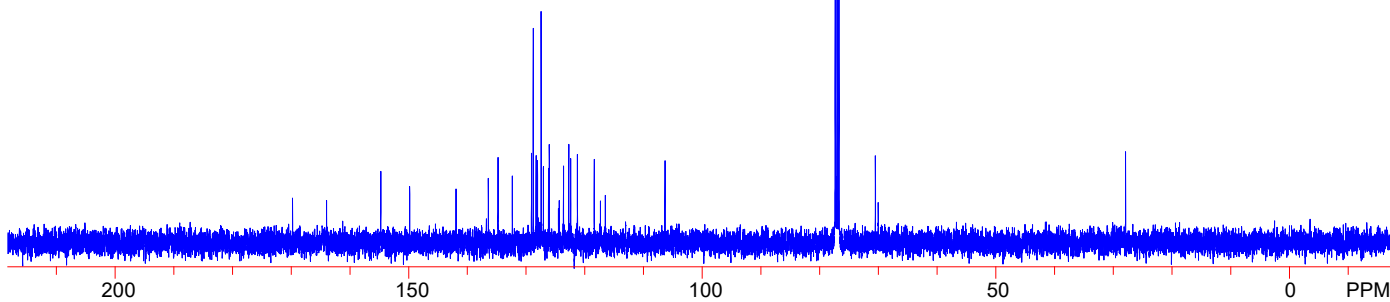

8.451  
8.448  
8.431  
8.429  
8.360  
8.347  
8.339  
8.327  
8.220  
8.198  
8.139  
8.118  
7.645  
7.623  
7.561  
7.558  
7.541  
7.523  
7.520  
7.510  
7.490  
7.482  
7.479  
7.470  
7.463  
7.460  
7.444  
7.441  
7.406  
7.385  
7.381  
7.360  
7.355  
7.337  
7.317  
7.265  
7.252  
7.228  
7.089  
7.071  
6.902  
6.882  
3.406

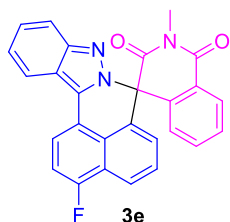

**3e**  
 $^1\text{H NMR}$  ( $\text{CDCl}_3$ , 400 MHz)

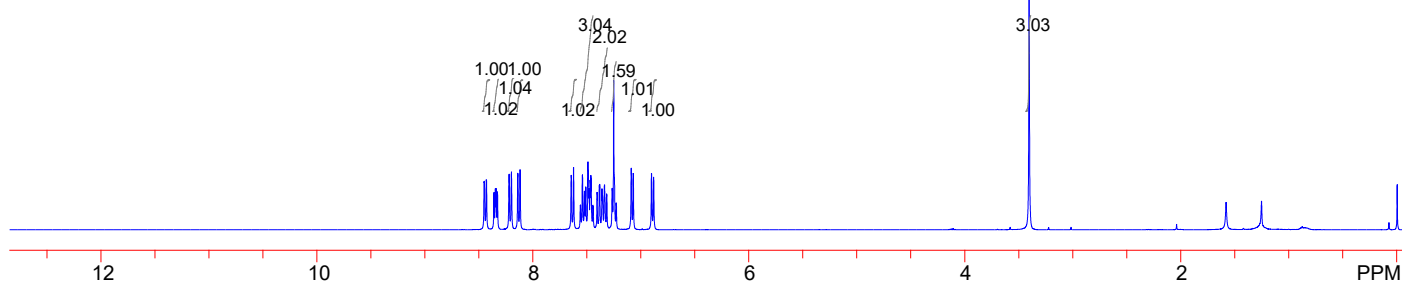

169.475  
163.805  
159.638  
157.095  
149.851  
141.545  
134.885  
132.942  
132.906  
131.505  
129.302  
128.912  
128.038  
127.222  
127.012  
126.998  
126.543  
124.730  
124.679  
124.448  
124.210  
124.037  
123.459  
122.000  
121.949  
121.689  
121.610  
120.996  
120.093  
120.042  
118.612  
117.760  
111.151  
110.942  
77.370  
77.052  
76.735  
69.938  
27.974

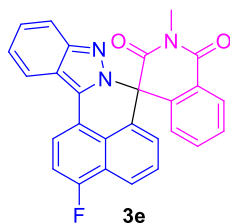

**3e**  
 $^{13}\text{C}\{^1\text{H}\}$  NMR ( $\text{CDCl}_3$ , 100 MHz)

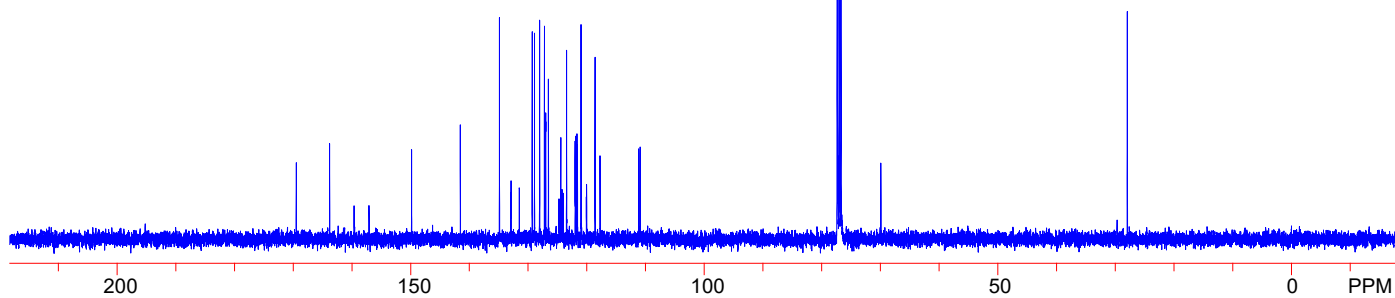

119.996  
120.011  
120.026  
120.037

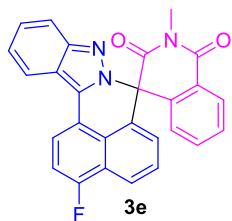

**3e**  
<sup>19</sup>F NMR (CDCl<sub>3</sub>, 376 MHz)

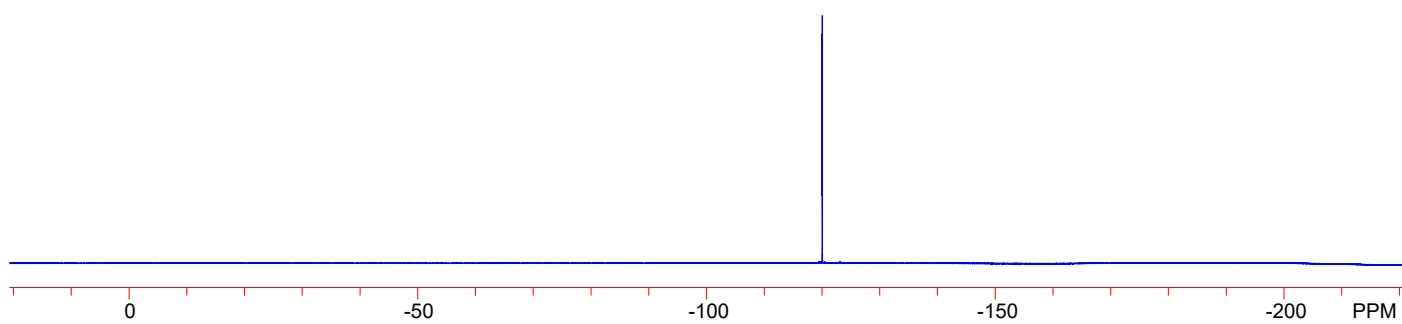

8.368  
8.365  
8.348  
8.346  
8.216  
8.195  
8.165  
8.145  
8.128  
8.106  
7.917  
7.897  
7.575  
7.553  
7.477  
7.474  
7.458  
7.439  
7.419  
7.395  
7.391  
7.375  
7.373  
7.357  
7.354  
7.279  
7.262  
7.260  
7.240  
7.196  
7.170  
7.158  
7.004  
6.985  
6.810  
6.791  
3.319

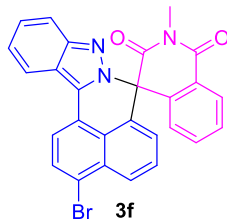

$^1\text{H NMR}$  ( $\text{CDCl}_3$ , 400 MHz)

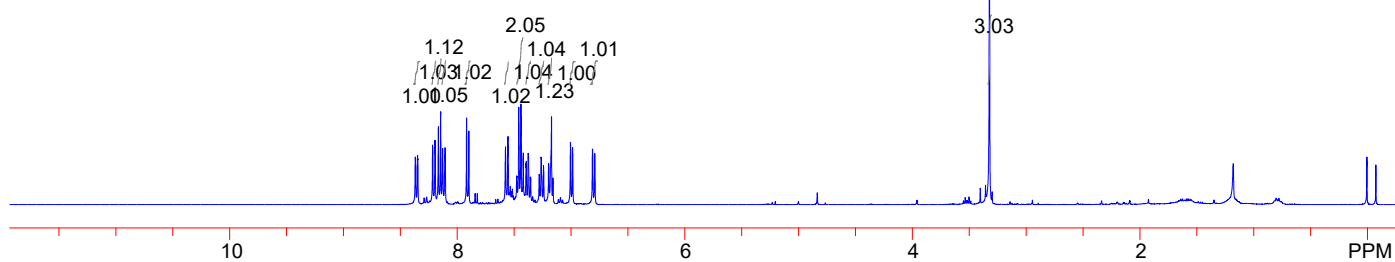

149.923  
141.501  
134.907  
169.367  
163.755  
133.181  
132.155  
131.303  
131.245  
129.360  
128.912  
128.710  
128.074  
127.785  
127.294  
126.550  
124.499  
124.434  
123.726  
123.379  
122.729  
121.733  
121.003  
118.699  
118.143  
77.385  
77.067  
76.749  
70.017  
27.988

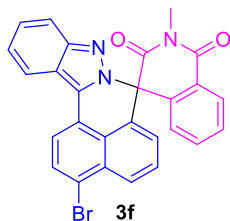

$^{13}\text{C}\{^1\text{H}\}$  NMR ( $\text{CDCl}_3$ , 100 MHz)

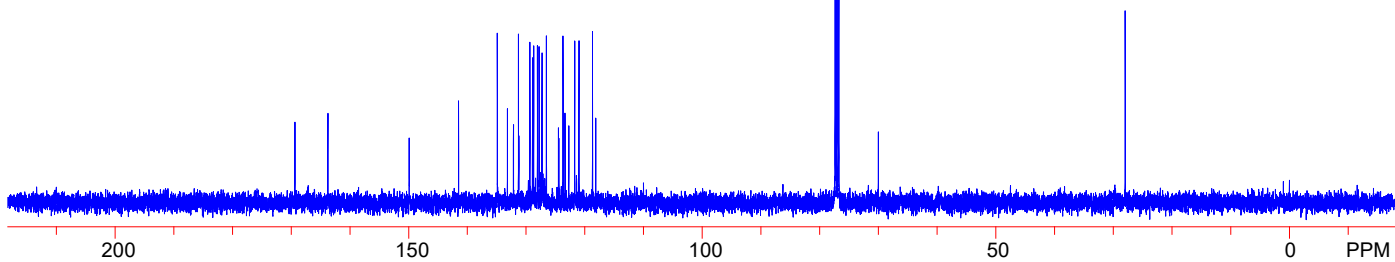

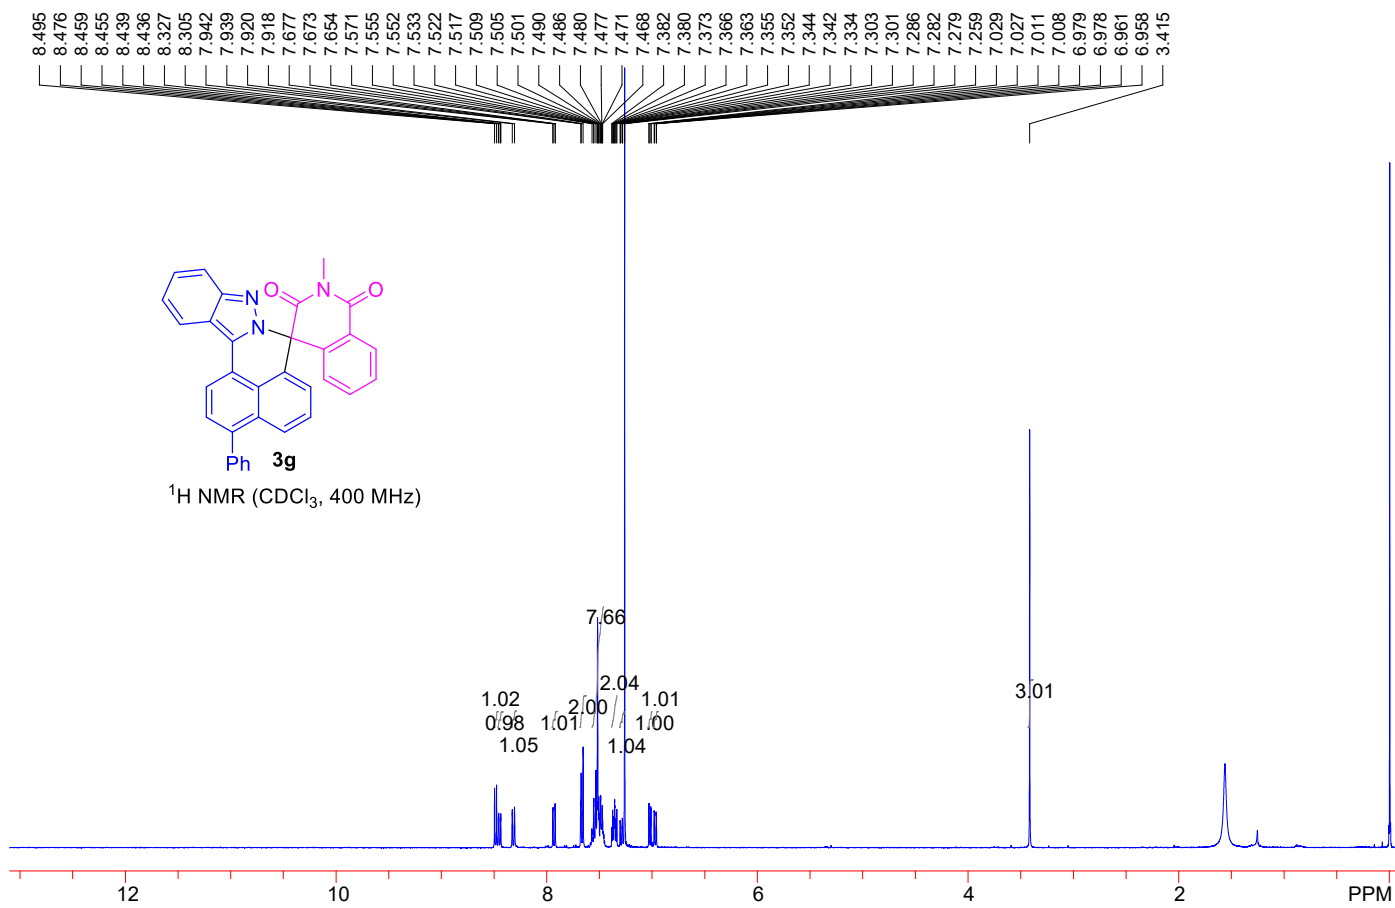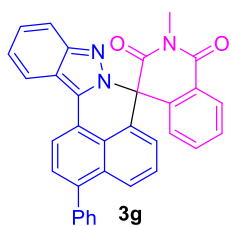

$^1\text{H}$  NMR ( $\text{CDCl}_3$ , 400 MHz)

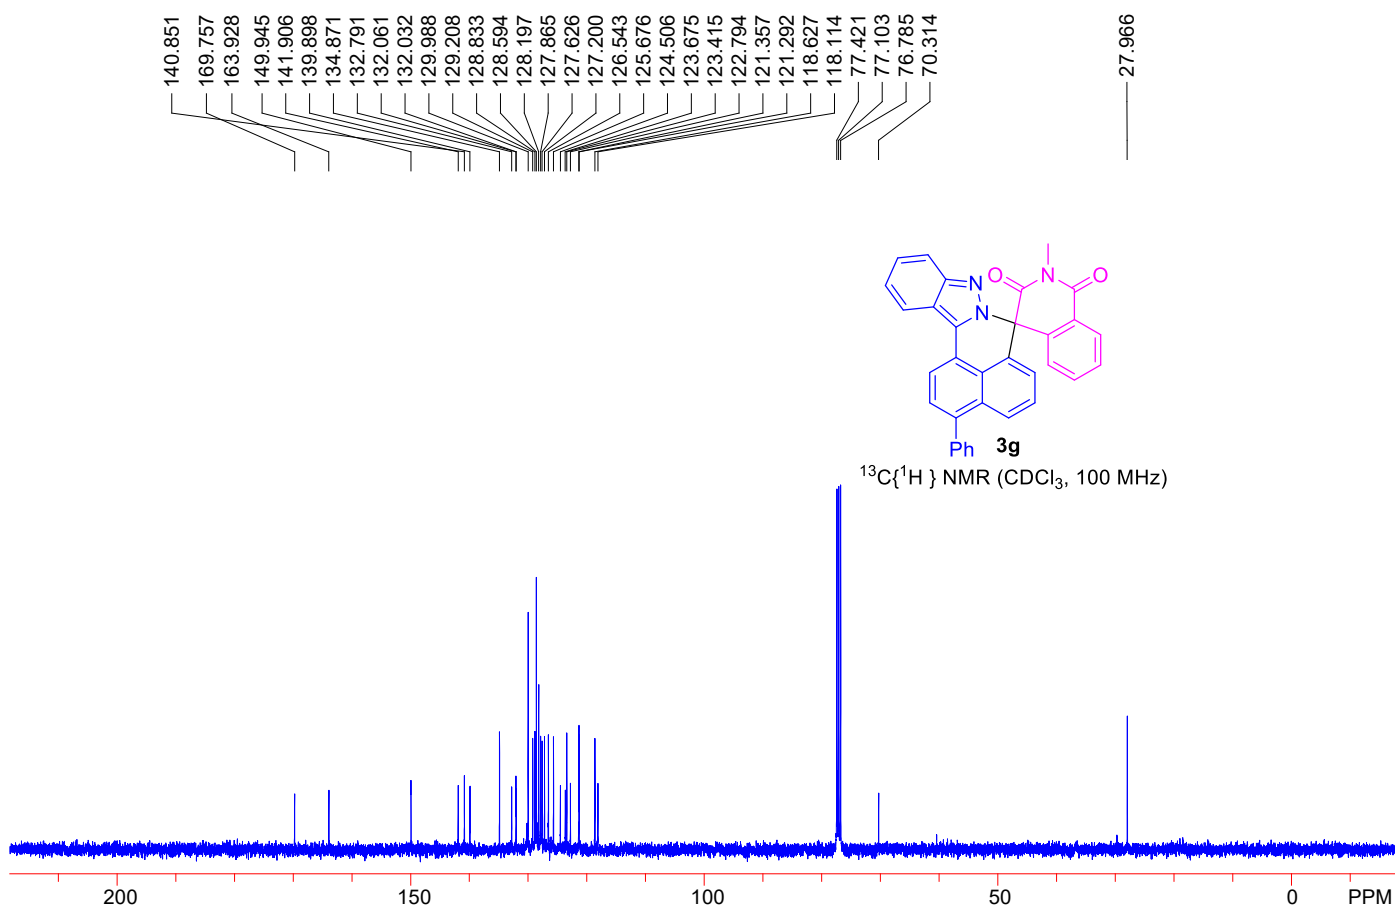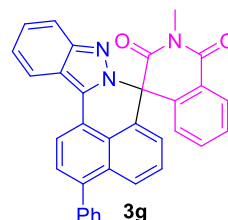

$^{13}\text{C}\{^1\text{H}\}$  NMR ( $\text{CDCl}_3$ , 100 MHz)

8.442  
8.432  
8.421  
8.413  
8.334  
8.323  
8.315  
8.305  
8.248  
8.239  
8.227  
7.637  
7.628  
7.617  
7.523  
7.505  
7.488  
7.476  
7.473  
7.470  
7.456  
7.443  
7.440  
7.437  
7.421  
7.412  
7.405  
7.402  
7.394  
7.335  
7.318  
7.313  
7.296  
7.287  
7.240  
7.228  
7.226  
7.219  
7.202  
7.031  
7.020  
7.013  
7.004  
6.898  
6.887  
6.878  
3.397  
2.349  
2.341  
2.328  
2.316  
2.308  
1.138  
1.126  
1.124  
1.120  
1.116  
1.108  
1.105  
1.094  
0.841  
0.829  
0.818  
0.805

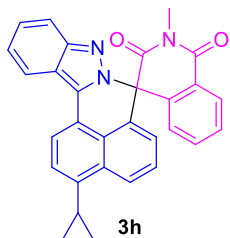

<sup>1</sup>H NMR (CDCl<sub>3</sub>, 400 MHz)

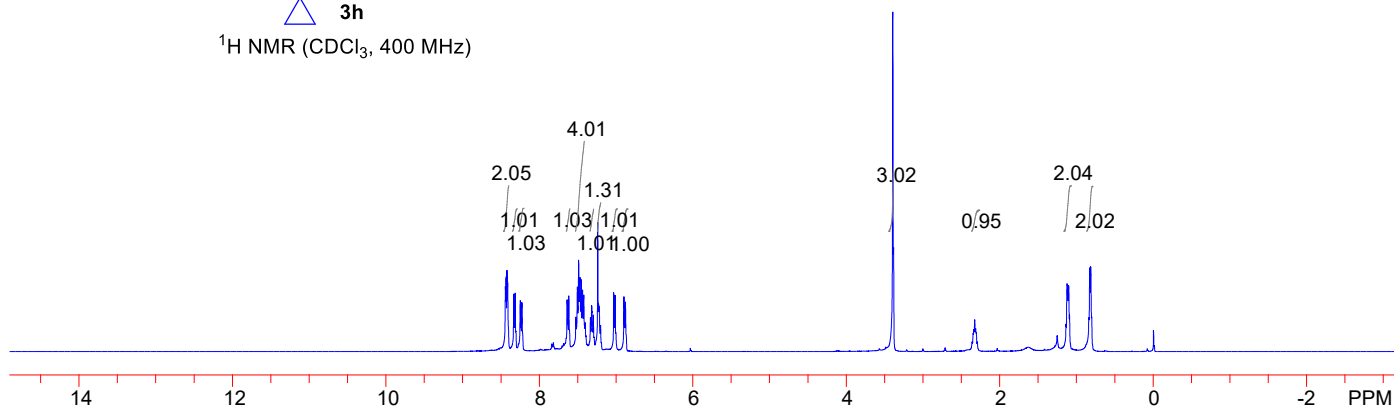

169.735  
163.979  
149.872  
141.964  
140.201  
134.799  
133.802  
132.950  
132.213  
129.114  
128.796  
128.096  
127.092  
126.370  
125.850  
125.394  
125.236  
124.427  
123.408  
123.134  
121.790  
121.566  
121.292  
118.518  
117.897  
77.399  
77.081  
76.764  
70.249  
27.938  
13.680  
6.796  
6.746

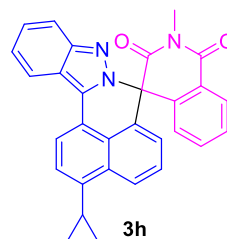

<sup>13</sup>C{<sup>1</sup>H} NMR (CDCl<sub>3</sub>, 100 MHz)

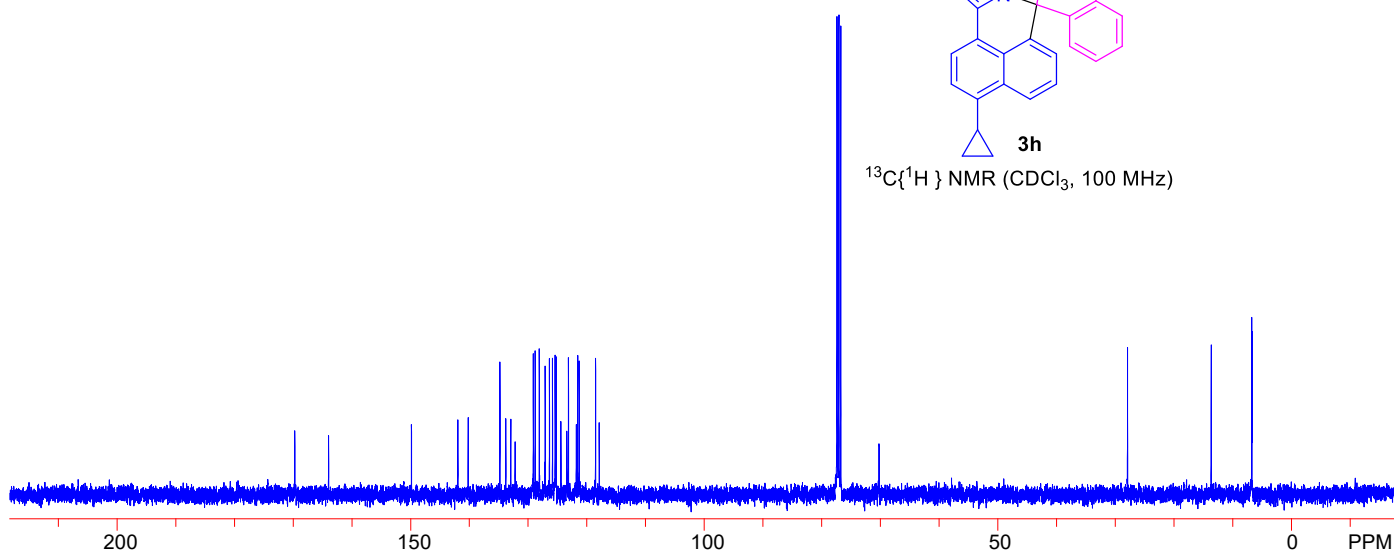

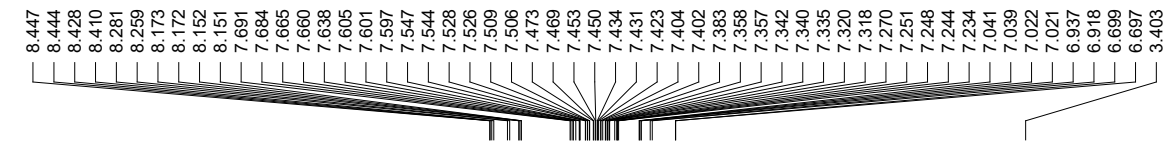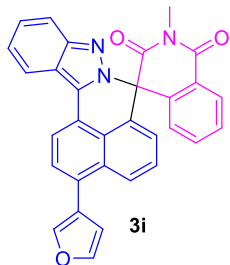

$^1\text{H}$  NMR ( $\text{CDCl}_3$ , 400 MHz)

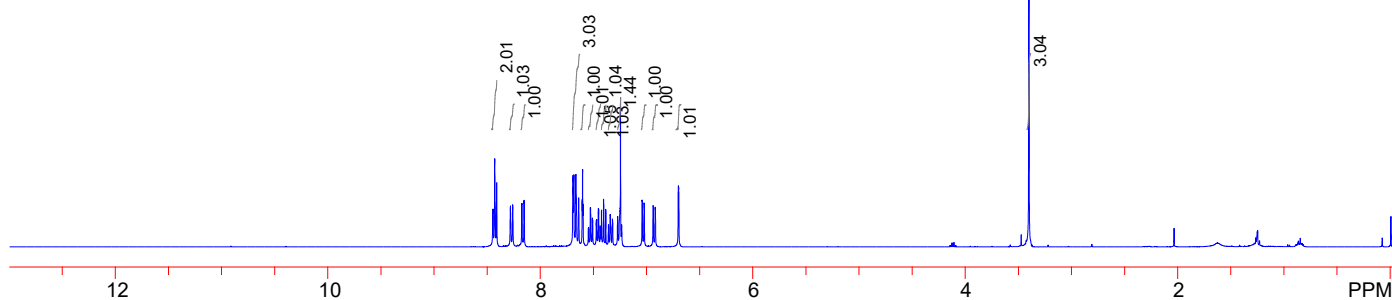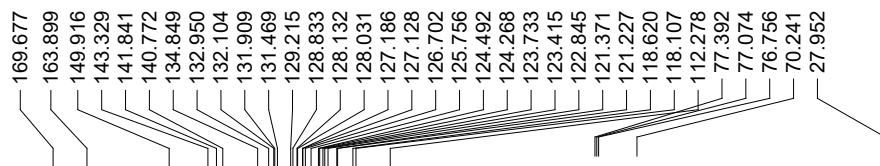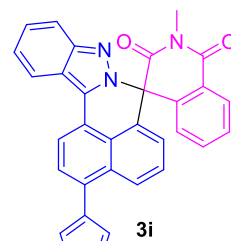

$^{13}\text{C}\{^1\text{H}\}$  NMR ( $\text{CDCl}_3$ , 100 MHz)

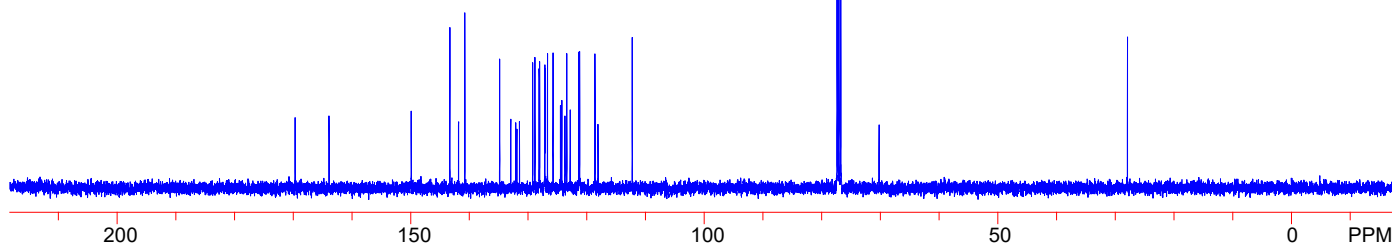



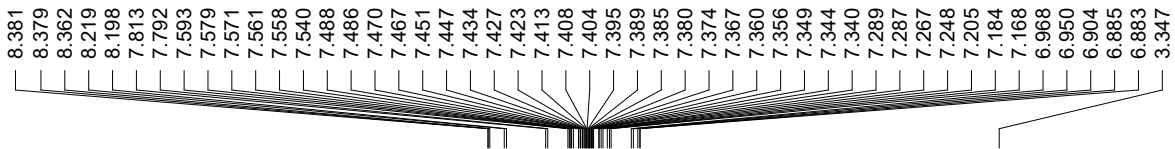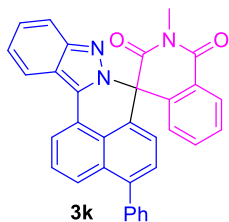

$^1\text{H NMR}$  ( $\text{CDCl}_3$ , 400 MHz)

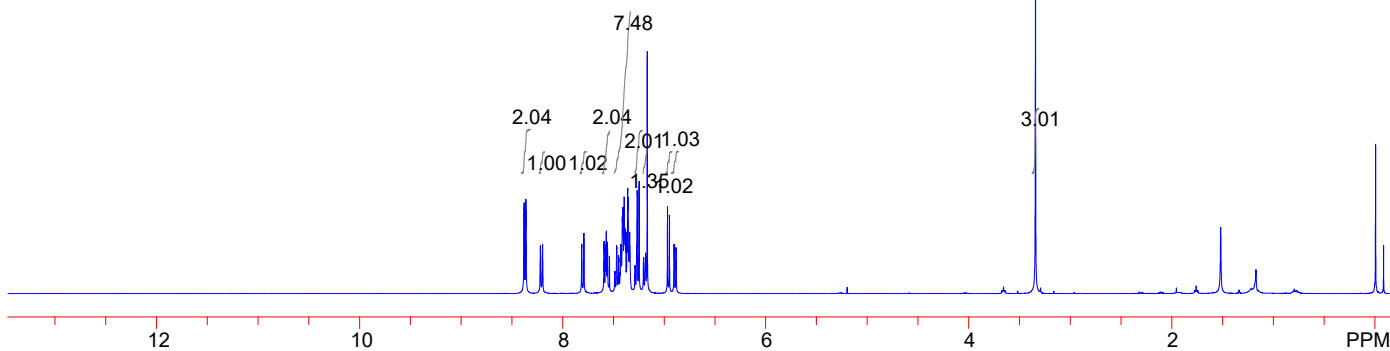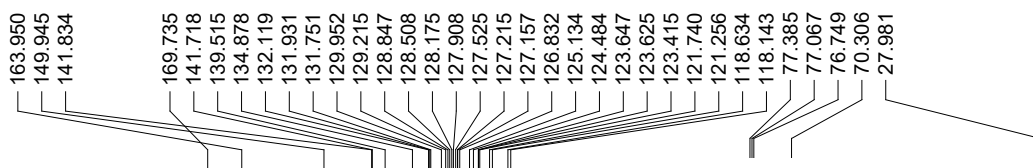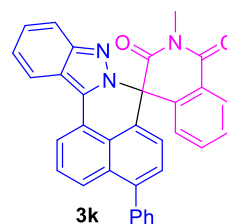

$^{13}\text{C}\{^1\text{H}\}$  NMR ( $\text{CDCl}_3$ , 100 MHz)

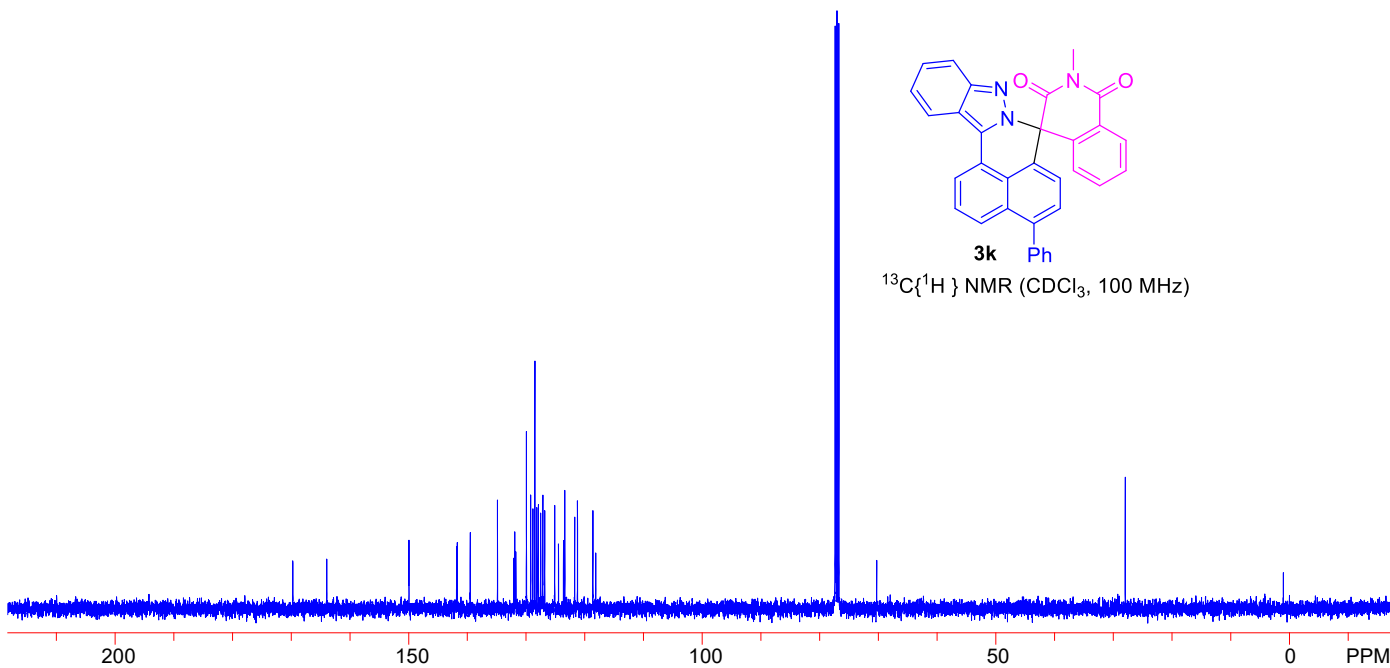

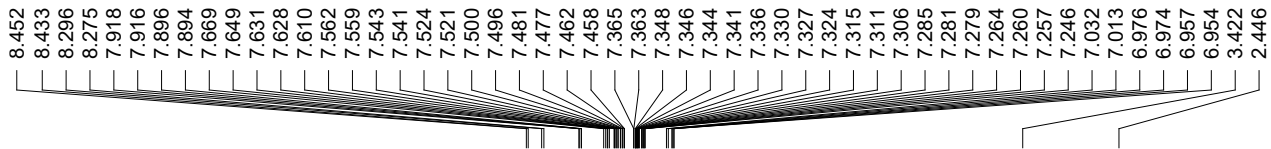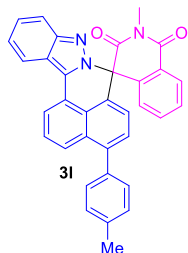

$^1\text{H}$  NMR ( $\text{CDCl}_3$ , 400 MHz)

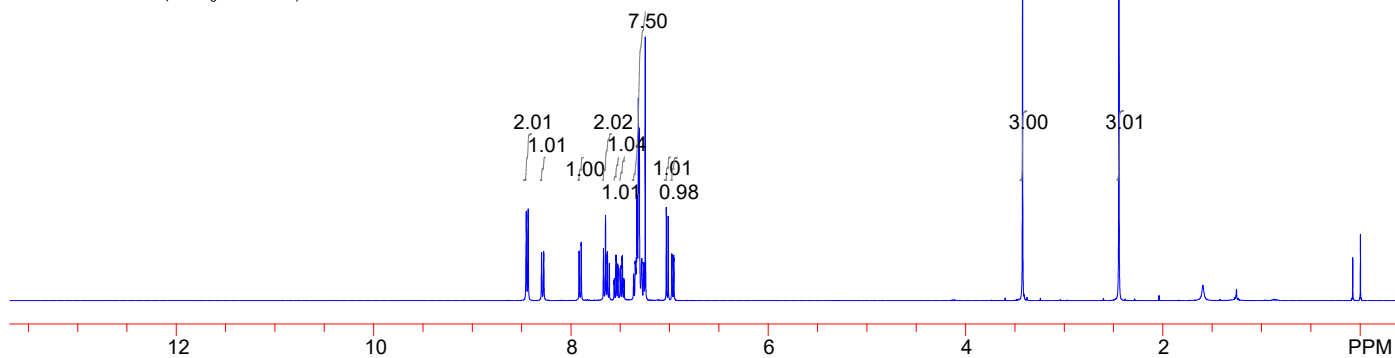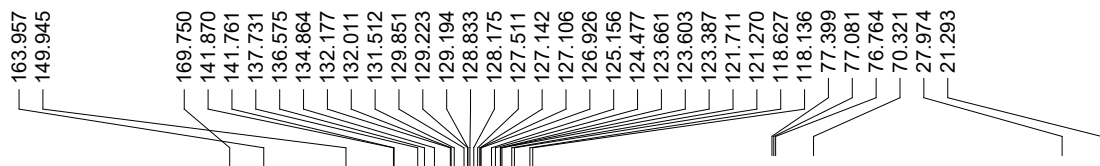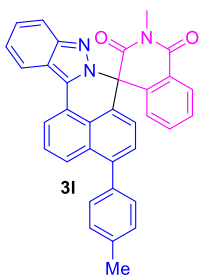

$^{13}\text{C}\{^1\text{H}\}$  NMR ( $\text{CDCl}_3$ , 100 MHz)

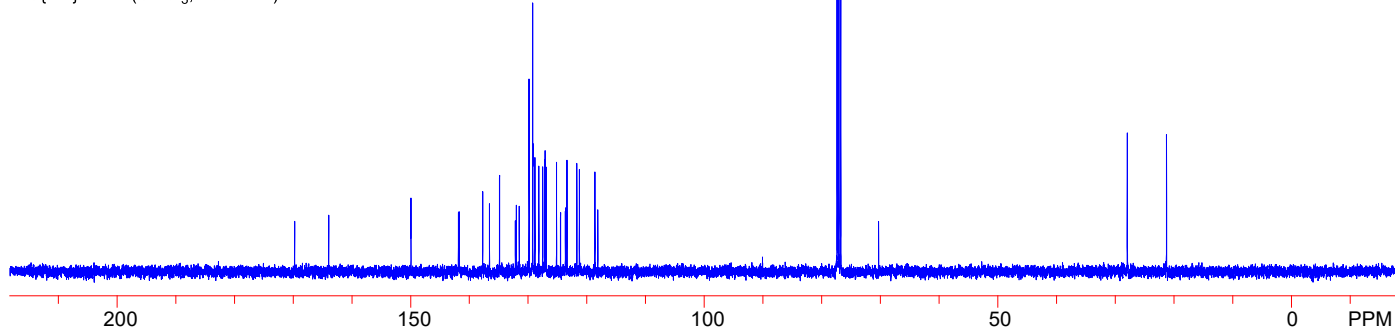

8.709  
8.699  
8.689  
8.642  
8.628  
8.619  
8.457  
8.437  
8.415  
8.079  
8.070  
8.057  
7.698  
7.690  
7.675  
7.668  
7.604  
7.584  
7.564  
7.550  
7.531  
7.512  
7.461  
7.442  
7.422  
7.392  
7.375  
7.354  
7.332  
7.312  
7.295  
7.251  
7.117  
7.099  
6.902  
6.882  
3.427

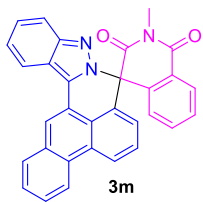

$^1\text{H NMR}$  ( $\text{CDCl}_3$ , 400 MHz)

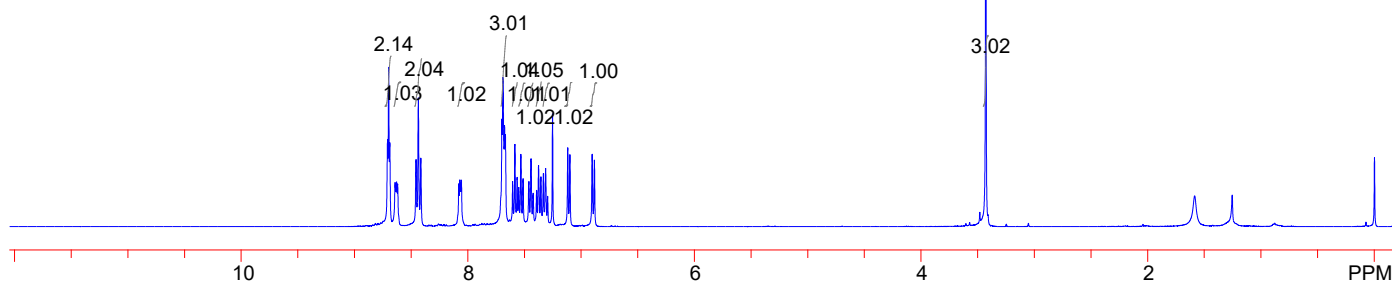

169.685  
163.935  
149.880  
141.682  
134.827  
132.921  
131.967  
131.743  
131.028  
129.851  
129.338  
129.194  
128.869  
128.067  
128.016  
127.764  
127.366  
127.193  
125.698  
124.535  
123.820  
123.394  
123.047  
122.975  
122.570  
121.321  
118.656  
118.128  
77.370  
77.052  
76.735  
70.090  
27.981

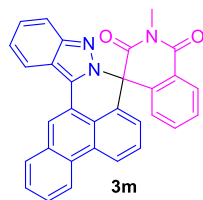

$^{13}\text{C}\{^1\text{H}\}$  NMR ( $\text{CDCl}_3$ , 100 MHz)

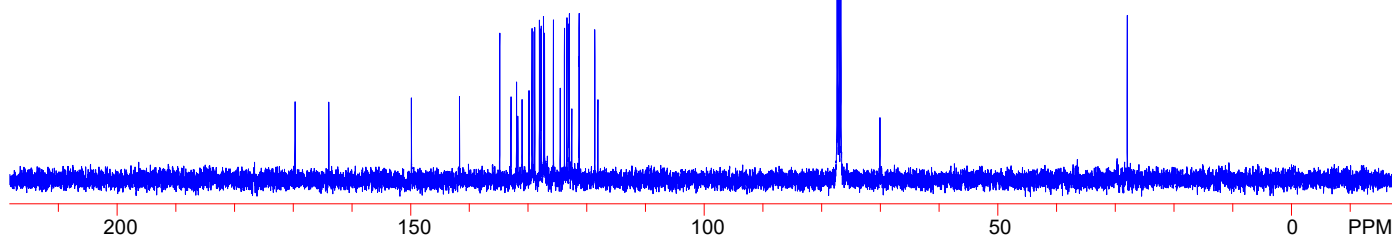

8.841  
8.821  
8.457  
8.438  
8.344  
8.323  
8.302  
8.281  
8.112  
8.095  
8.008  
7.985  
7.976  
7.953  
7.919  
7.903  
7.900  
7.896  
7.877  
7.858  
7.611  
7.590  
7.523  
7.504  
7.495  
7.486  
7.425  
7.406  
7.387  
7.304  
7.287  
7.266  
7.235  
7.215  
7.198  
7.175  
7.020  
7.001  
3.360

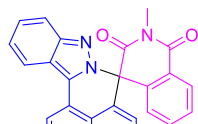

**3n**

$^1\text{H NMR}$  ( $\text{CDCl}_3$ , 400 MHz)

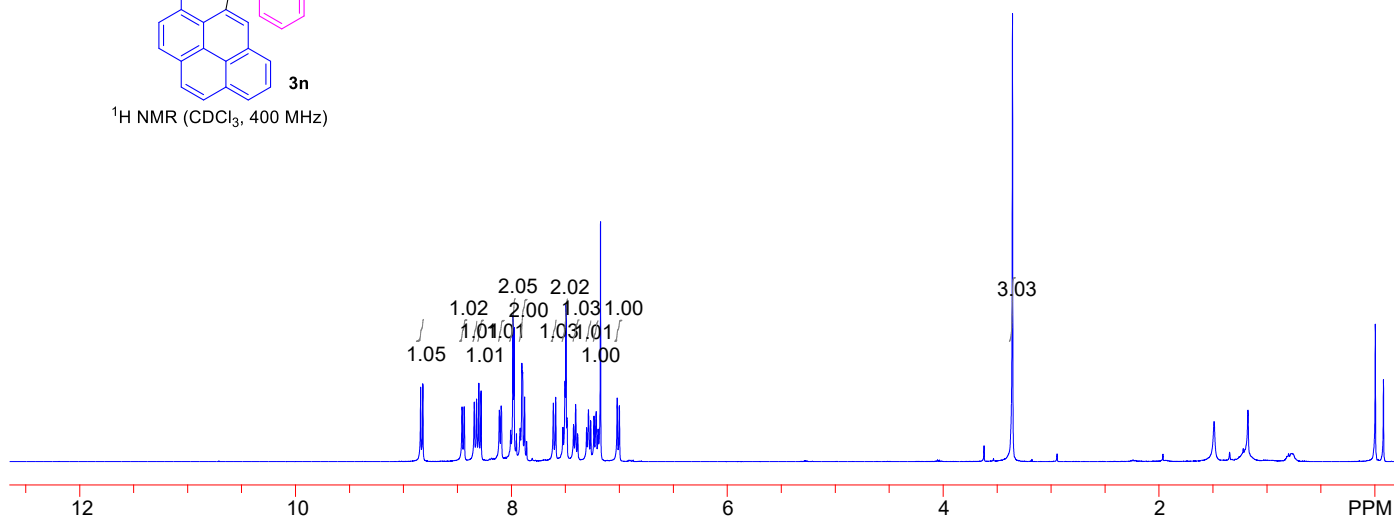

169.656  
164.109  
150.133  
141.956  
134.965  
132.805  
132.415  
131.397  
131.180  
130.234  
129.302  
128.876  
128.305  
127.836  
127.605  
127.511  
127.215  
126.904  
126.738  
126.695  
126.008  
124.701  
124.578  
124.188  
123.517  
121.371  
121.324  
121.220  
120.562  
118.706  
118.490  
77.363  
77.045  
76.727  
70.552  
27.995

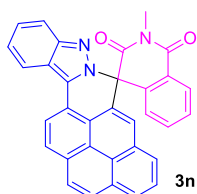

**3n**

$^{13}\text{C}\{^1\text{H}\}$  NMR ( $\text{CDCl}_3$ , 100 MHz)

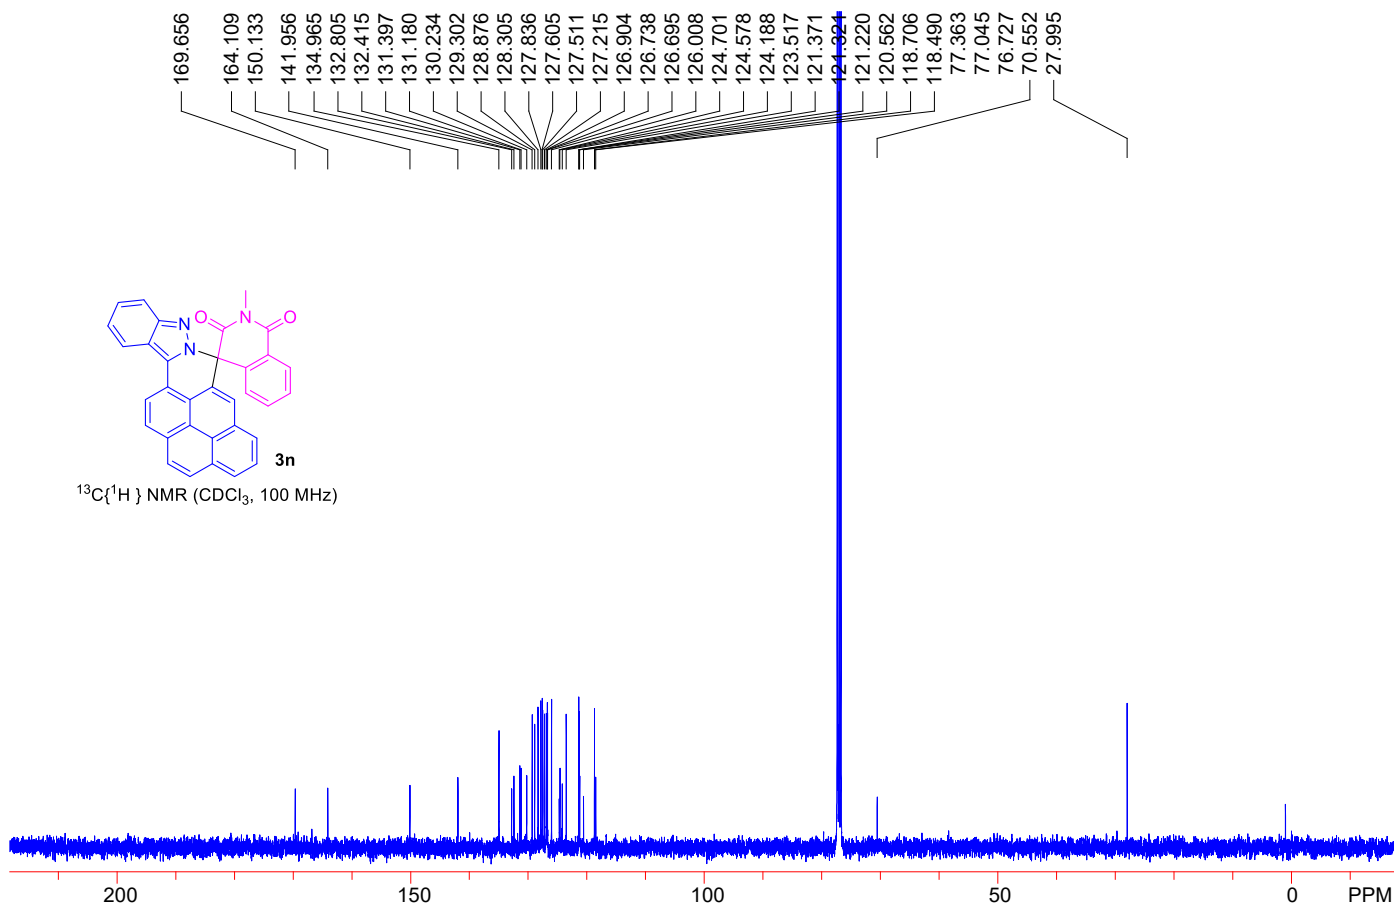

9.558  
9.146  
9.125  
8.784  
8.765  
8.569  
8.542  
8.406  
8.403  
8.386  
8.383  
8.284  
8.263  
8.072  
8.053  
8.033  
7.795  
7.688  
7.678  
7.670  
7.665  
7.662  
7.653  
7.650  
7.645  
7.641  
7.637  
7.626  
7.620  
7.604  
7.584  
7.581  
7.566  
7.562  
7.413  
7.397  
7.377  
7.375  
7.339  
7.320  
7.309  
7.115  
7.096  
3.339

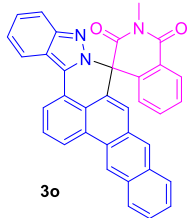

$^1\text{H}$  NMR (DMSO- $d_6$ , 400 MHz)

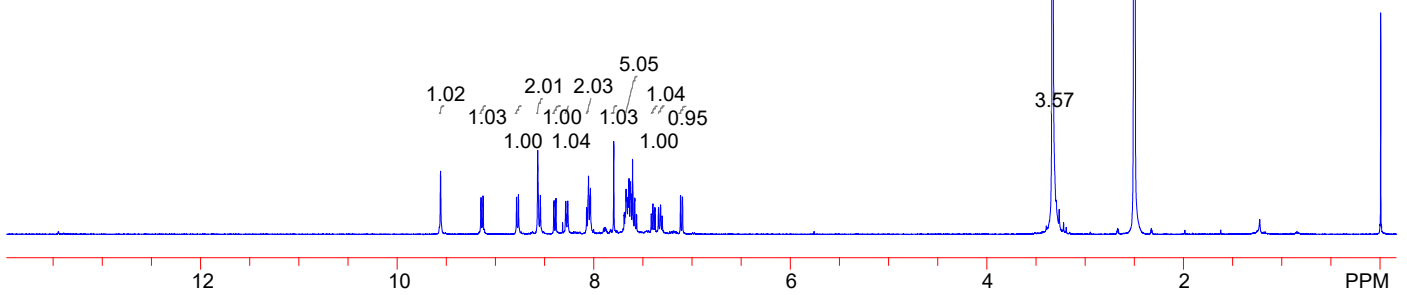

168.204  
164.795  
162.476  
162.043  
161.610  
161.176  
143.423  
142.368  
137.023  
135.752  
134.423  
133.527  
132.755  
132.372  
131.873  
131.353  
129.995  
128.963  
128.760  
128.298  
128.219  
128.132  
127.995  
127.569  
127.475  
127.193  
127.135  
126.882  
126.673  
126.189  
125.366  
123.004  
122.007  
121.949  
119.479  
118.518  
117.507  
115.702  
112.885  
111.592  
110.075  
72.018  
27.858

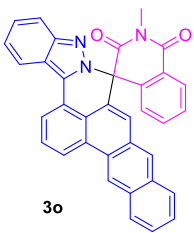

$^{13}\text{C}\{^1\text{H}\}$  NMR (CF $_3$ CO $_2$ D, 100 MHz)

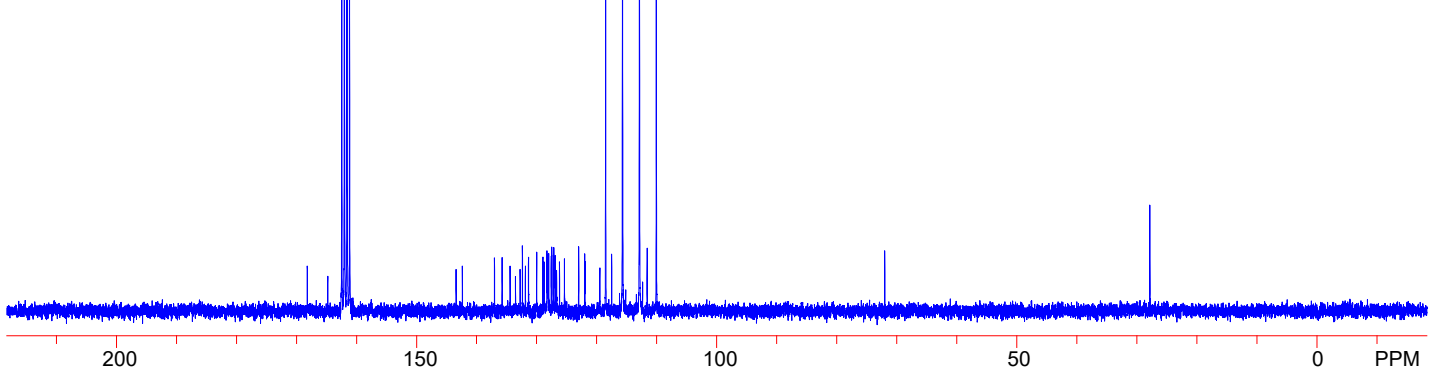

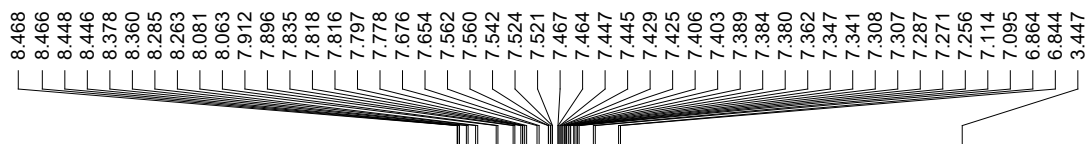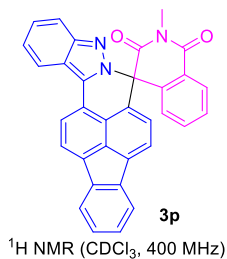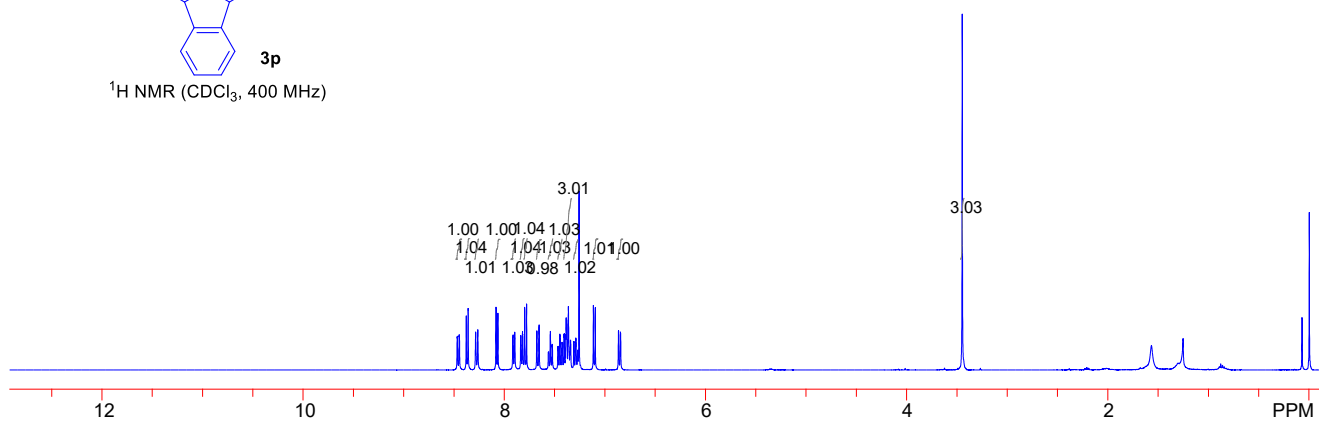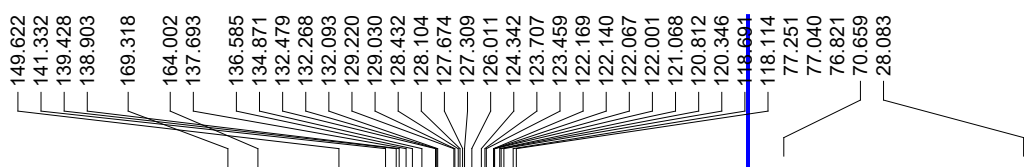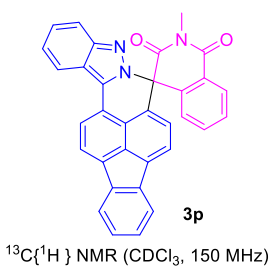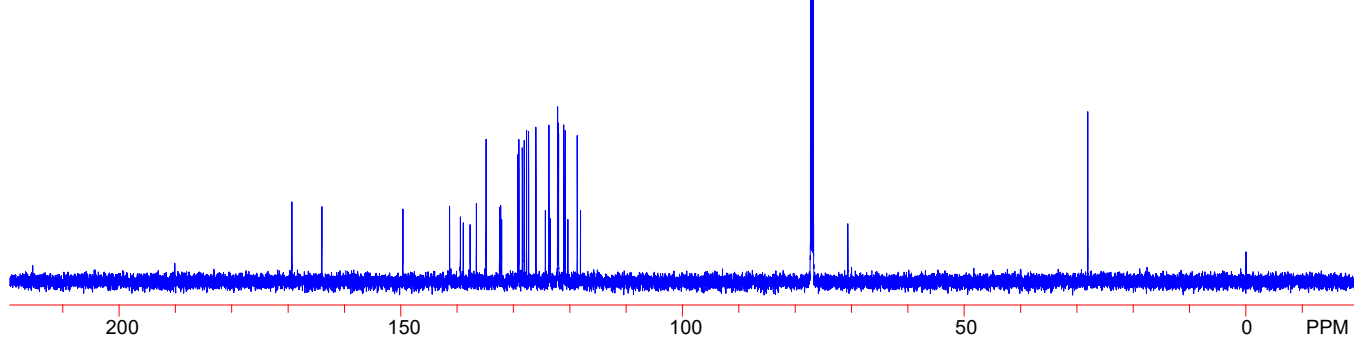

8.461  
8.442  
8.288  
8.268  
8.208  
8.186  
8.165  
8.062  
8.043  
7.949  
7.941  
7.929  
7.667  
7.645  
7.624  
7.618  
7.605  
7.551  
7.533  
7.514  
7.474  
7.456  
7.438  
7.413  
7.393  
7.374  
7.352  
7.334  
7.314  
7.249  
7.230  
7.211  
7.193  
6.964  
6.956  
6.946  
6.936  
3.469

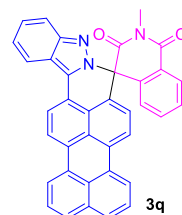

<sup>1</sup>H NMR (CDCl<sub>3</sub>, 400 MHz)

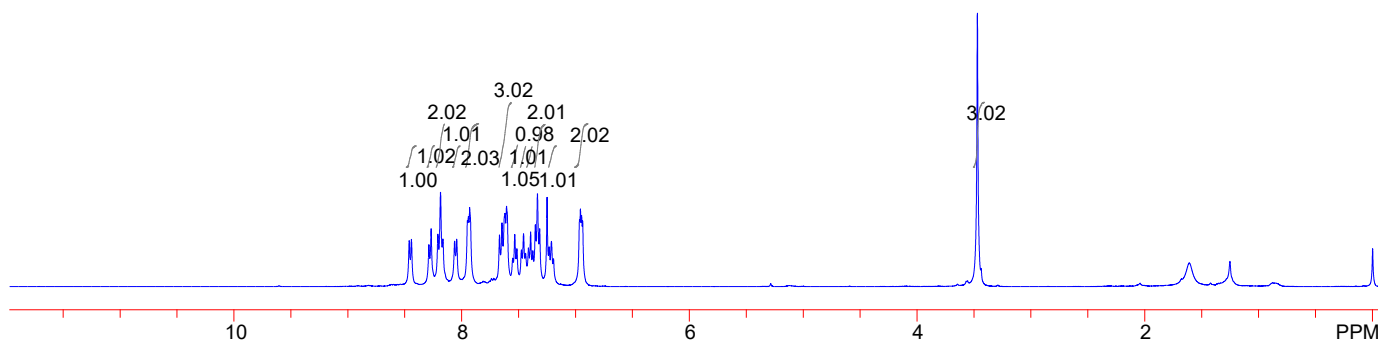

169.656  
163.979  
149.930  
141.660  
134.892  
134.365  
132.379  
132.003  
131.527  
131.194  
130.169  
129.706  
129.215  
128.890  
128.847  
128.688  
128.508  
128.045  
128.009  
127.193  
126.731  
126.593  
125.965  
124.528  
124.340  
123.379  
122.419  
122.173  
121.292  
121.169  
121.111  
121.025  
120.591  
118.540  
118.092  
77.377  
77.060  
76.742  
70.357  
28.031

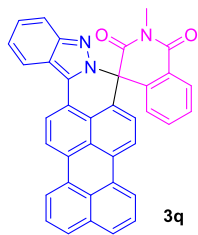

<sup>13</sup>C{<sup>1</sup>H} NMR (CDCl<sub>3</sub>, 100 MHz)

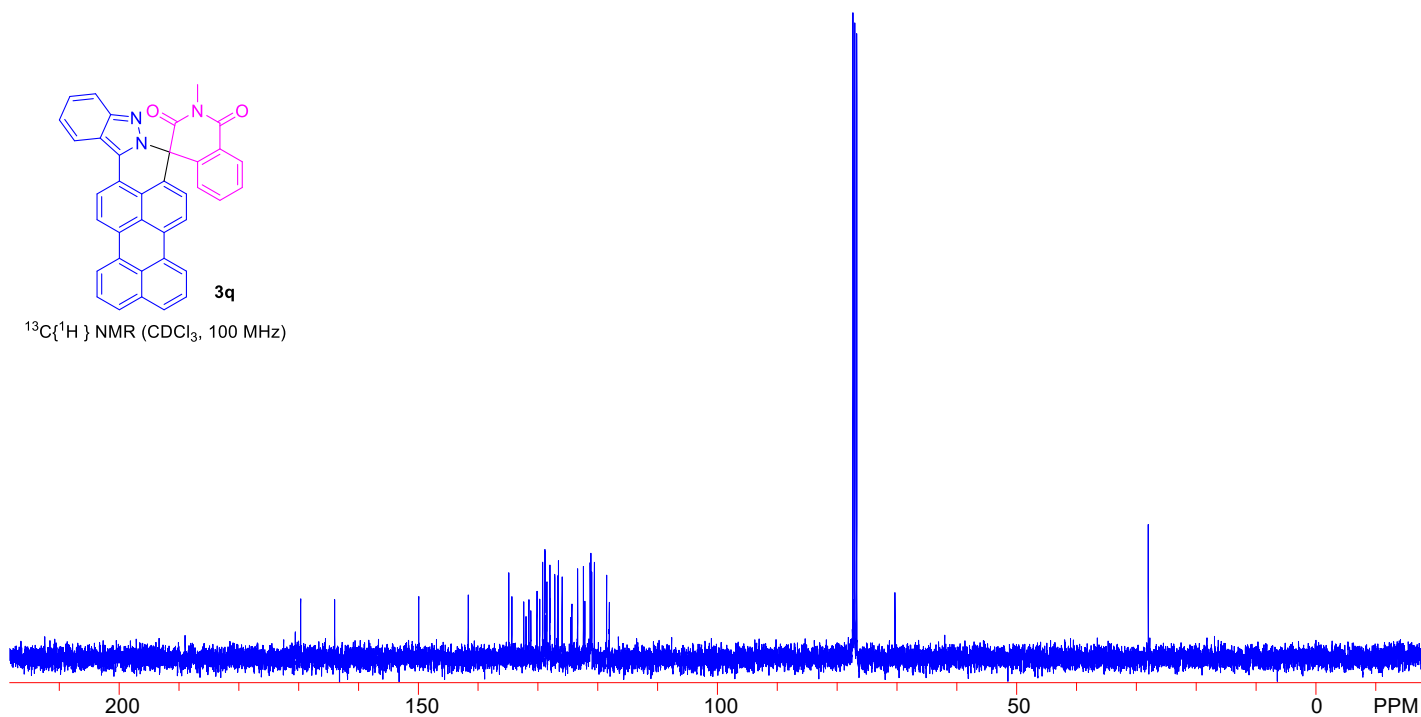

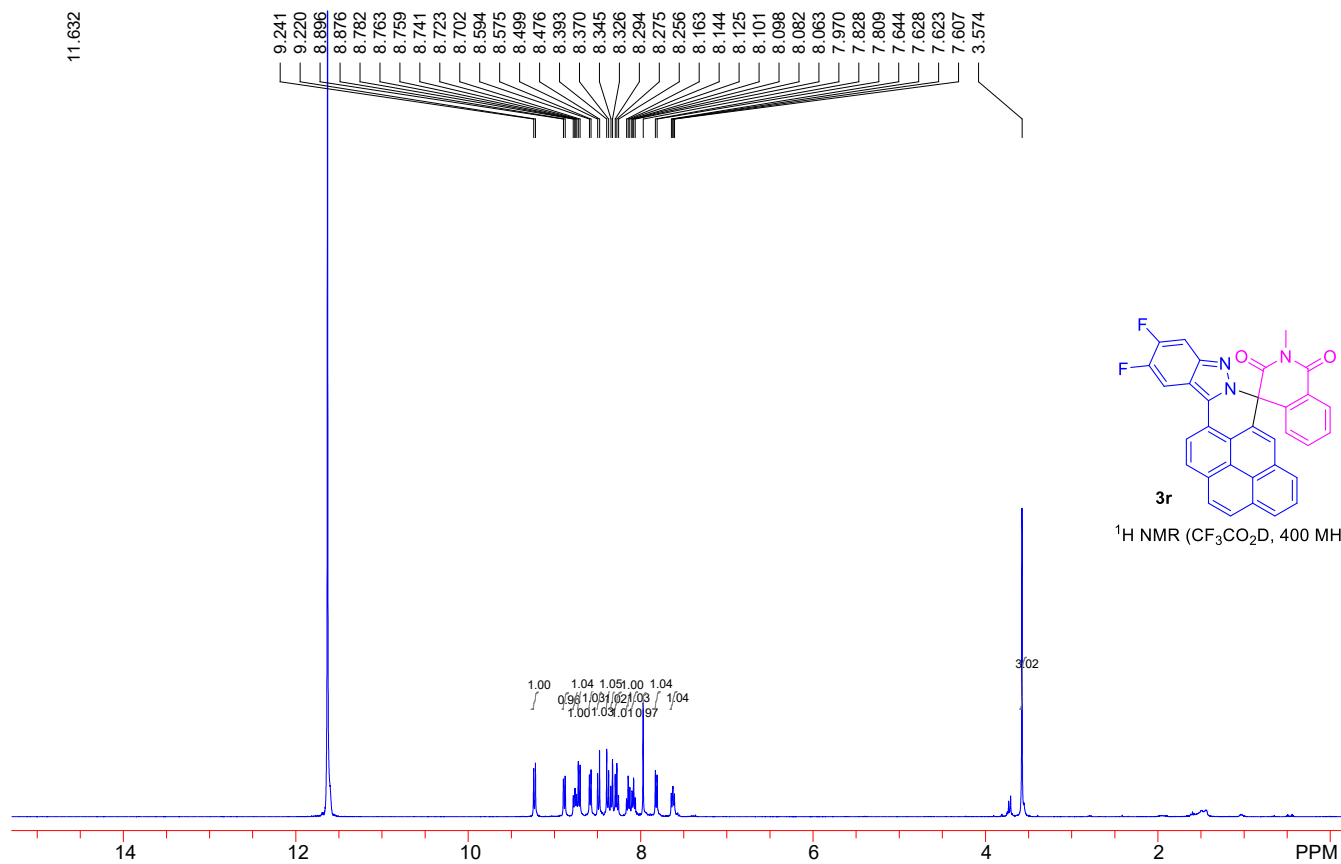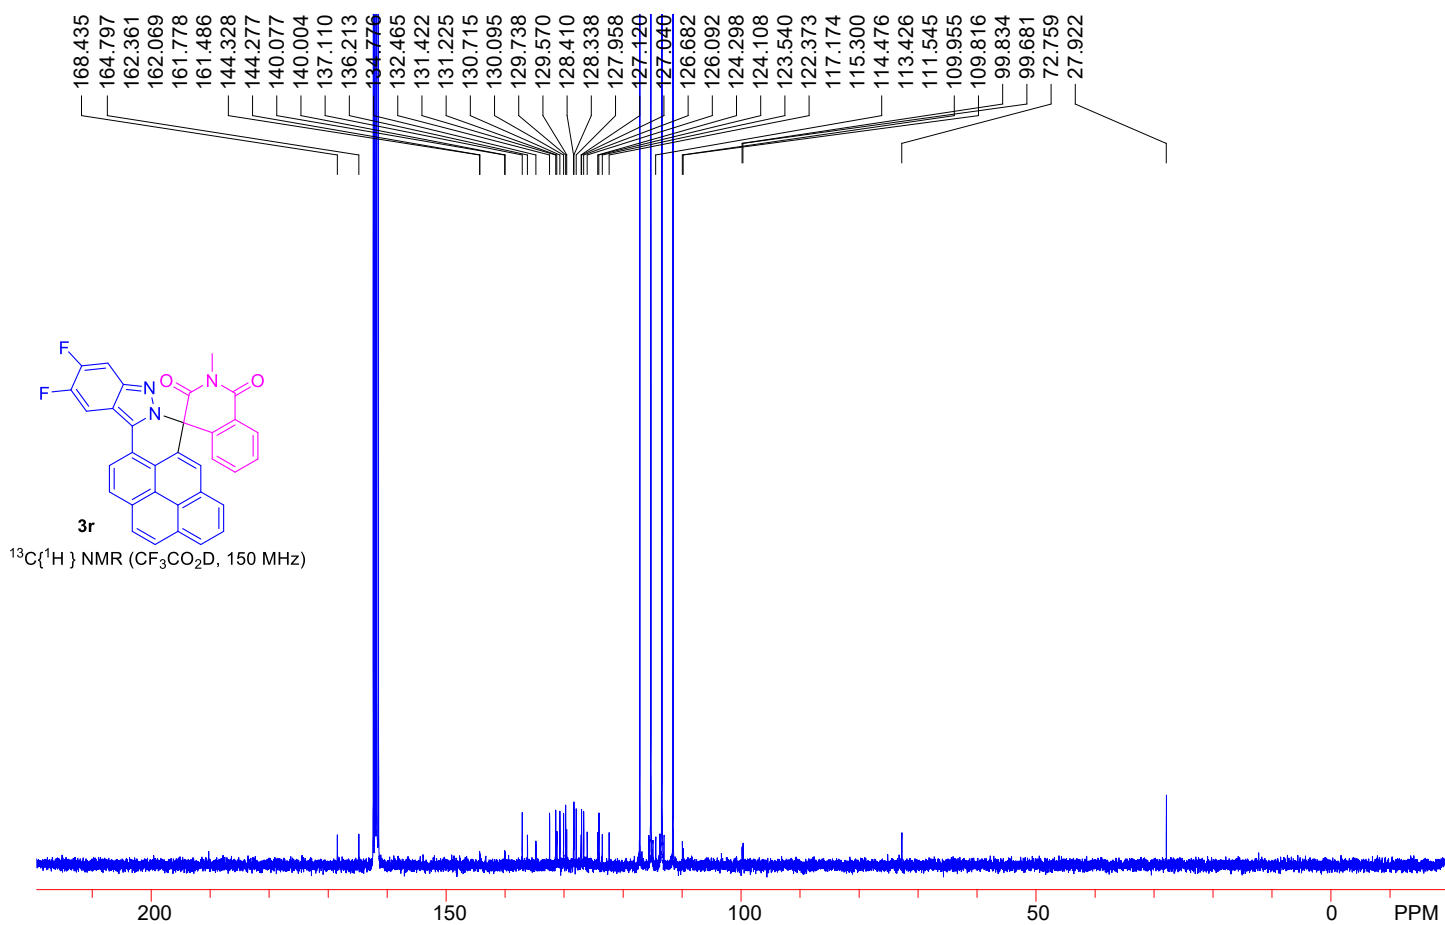

133.023  
133.049  
133.071  
133.093  
133.101  
133.123  
138.269  
138.295  
138.317  
138.339  
138.347  
138.365

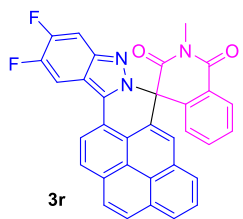

$^{19}\text{F}$  NMR ( $\text{CDCl}_3$ , 376 MHz)

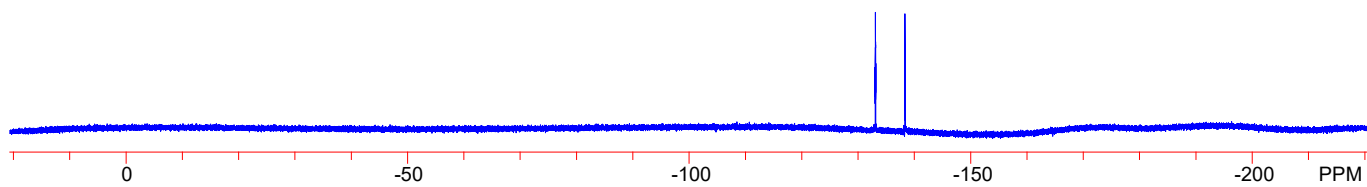

8.427  
8.421  
8.411  
8.407  
8.404  
7.973  
7.955  
7.861  
7.839  
7.818  
7.666  
7.662  
7.649  
7.630  
7.610  
7.552  
7.548  
7.542  
7.535  
7.529  
7.524  
7.519  
7.399  
7.380  
7.360  
7.257  
7.033  
7.026  
7.016  
7.011  
6.965  
6.946  
6.886  
6.881  
3.362

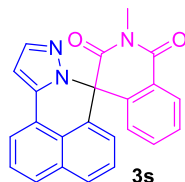

$^1\text{H}$  NMR ( $\text{CDCl}_3$ , 400 MHz)

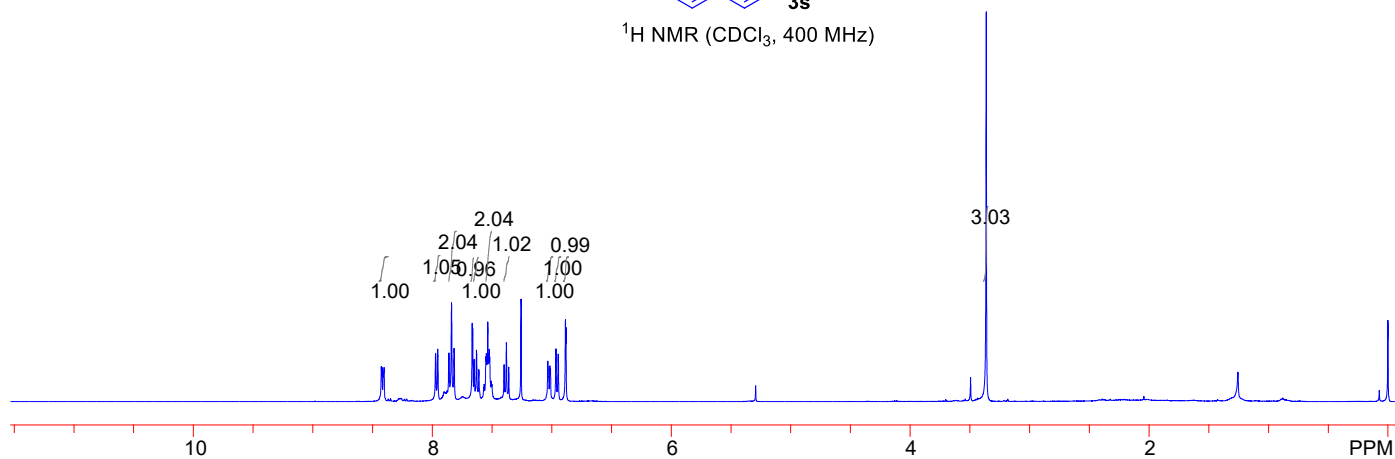

169.945  
163.914  
142.236  
141.339  
140.508  
134.776  
133.493  
132.793  
129.162  
129.001  
128.790  
128.644  
127.988  
127.032  
126.405  
125.516  
124.940  
123.233  
122.220  
121.855  
100.971  
77.266  
77.054  
76.843  
68.851  
27.835

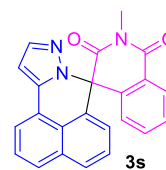

$^{13}\text{C}\{^1\text{H}\}$  NMR ( $\text{CDCl}_3$ , 150 MHz)

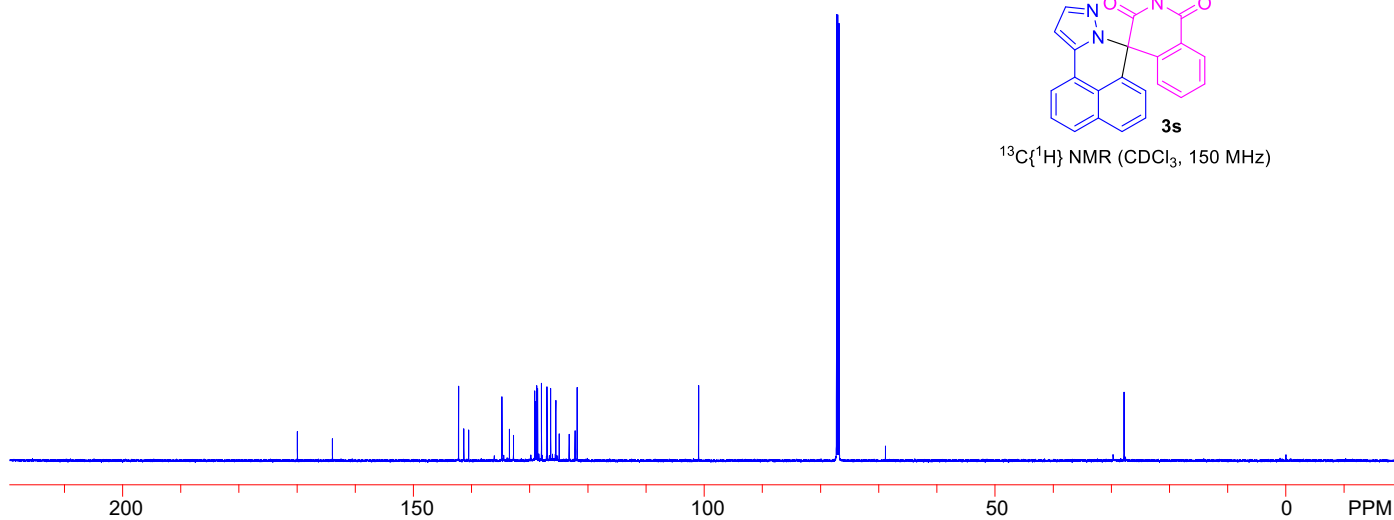

12.186

8.622  
8.606  
8.518  
8.498  
8.300  
8.281  
8.059  
8.050  
8.040  
7.831  
7.814  
7.799  
7.626  
7.608  
7.570  
7.553  
7.536  
7.400  
7.385  
7.366  
7.314  
7.297  
7.272  
7.251  
6.921  
6.903  
2.506

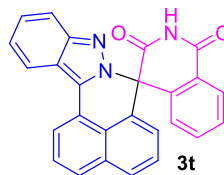

$^1\text{H}$  NMR (DMSO- $d_6$ , 400 MHz)

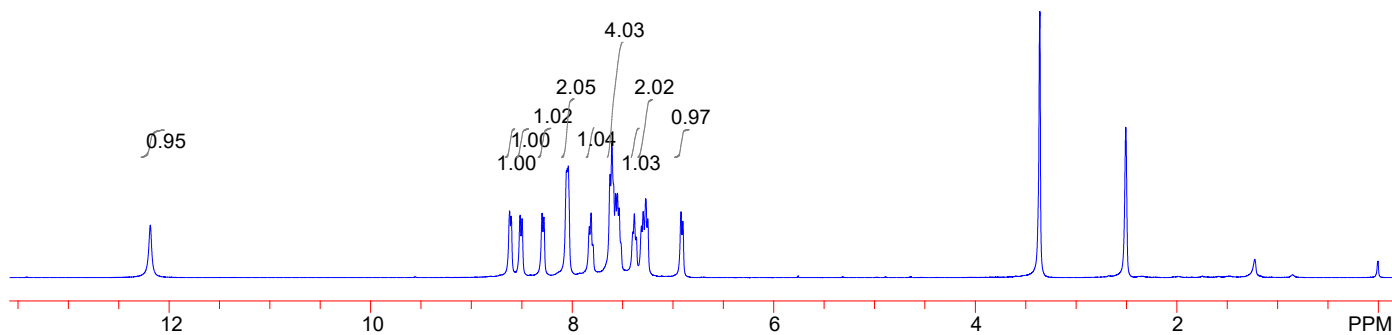

169.937  
164.202  
135.716  
133.332  
132.892  
126.806  
143.538  
131.411  
129.757  
129.483  
129.056  
128.825  
128.009  
127.951  
127.727  
127.626  
126.500  
124.116  
123.769  
122.989  
122.787  
122.397  
122.072  
118.323  
117.825  
69.757  
40.621  
40.418  
40.209  
40.000  
39.790  
39.581  
39.371

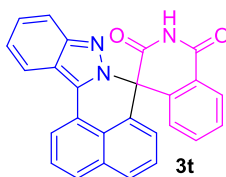

$^{13}\text{C}\{^1\text{H}\}$  NMR (DMSO- $d_6$ , 100 MHz)

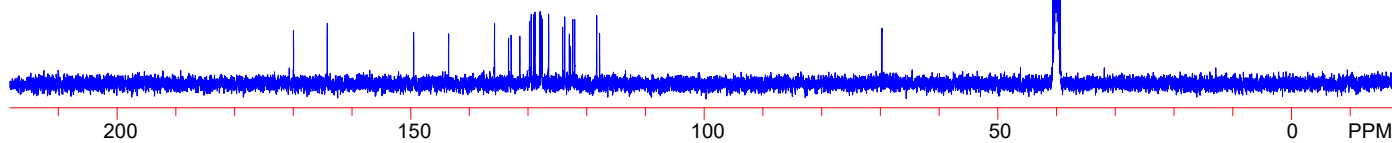

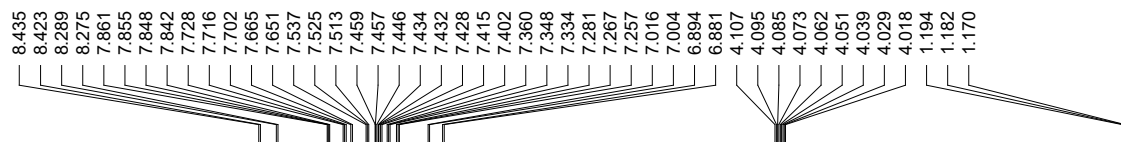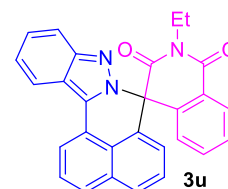

$^1\text{H}$  NMR ( $\text{CDCl}_3$ , 600 MHz)

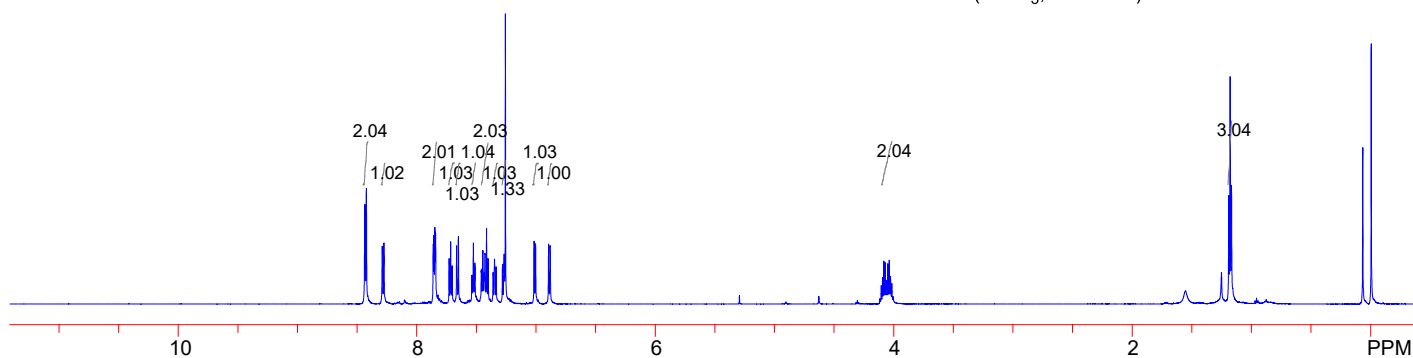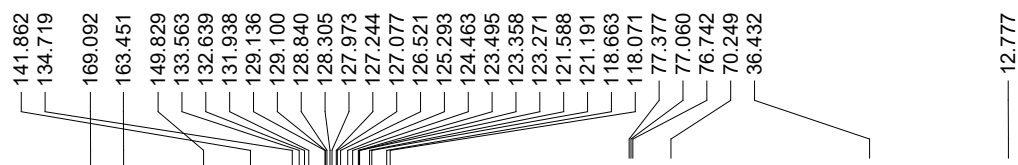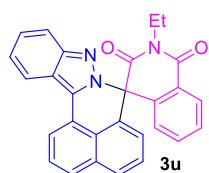

$^{13}\text{C}\{^1\text{H}\}$  NMR ( $\text{CDCl}_3$ , 100 MHz)

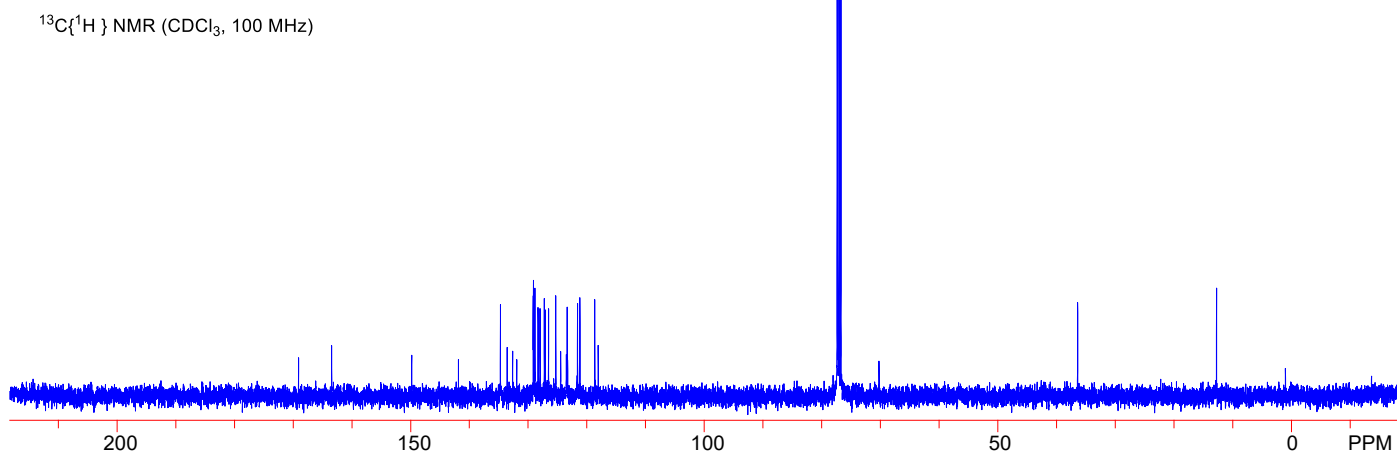

8.433  
8.423  
8.412  
8.279  
8.265  
7.849  
7.846  
7.835  
7.715  
7.702  
7.689  
7.659  
7.645  
7.533  
7.521  
7.509  
7.508  
7.455  
7.454  
7.442  
7.430  
7.428  
7.418  
7.405  
7.392  
7.350  
7.338  
7.324  
7.270  
7.256  
7.250  
7.245  
7.018  
7.005  
6.905  
6.891  
3.998  
3.994  
3.987  
3.977  
3.972  
3.962  
3.952  
3.948  
3.938  
3.931  
3.927  
3.916  
1.654  
1.642  
1.630  
1.618  
1.611  
1.605  
1.599  
1.587  
1.574  
1.562  
0.870  
0.858  
0.845

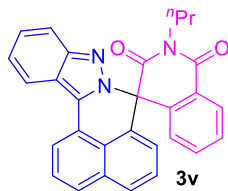

$^1\text{H}$  NMR ( $\text{CDCl}_3$ , 600 MHz)

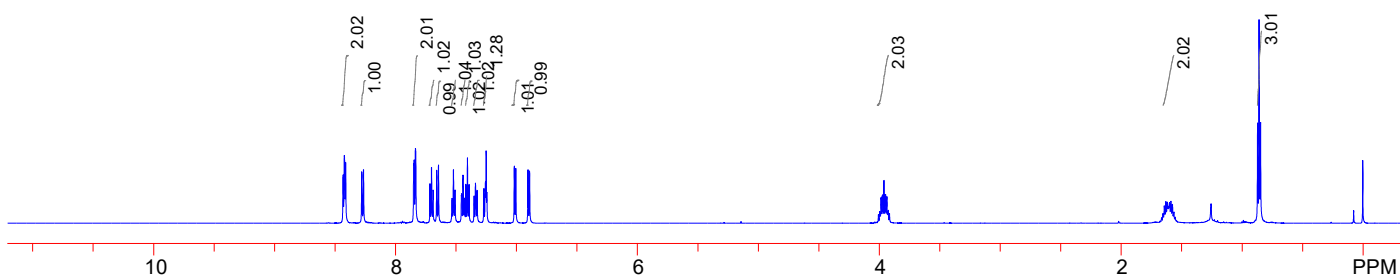

149.836  
141.805  
169.396  
163.668  
134.719  
133.549  
132.711  
131.967  
129.158  
129.121  
128.869  
128.305  
128.038  
127.251  
127.085  
126.485  
125.394  
124.535  
123.509  
123.358  
123.314  
121.603  
121.198  
118.656  
118.085  
77.399  
77.081  
76.764  
70.285  
42.708  
20.982  
11.289

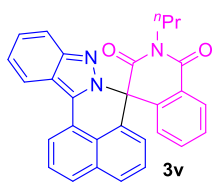

$^{13}\text{C}\{^1\text{H}\}$  NMR ( $\text{CDCl}_3$ , 100 MHz)

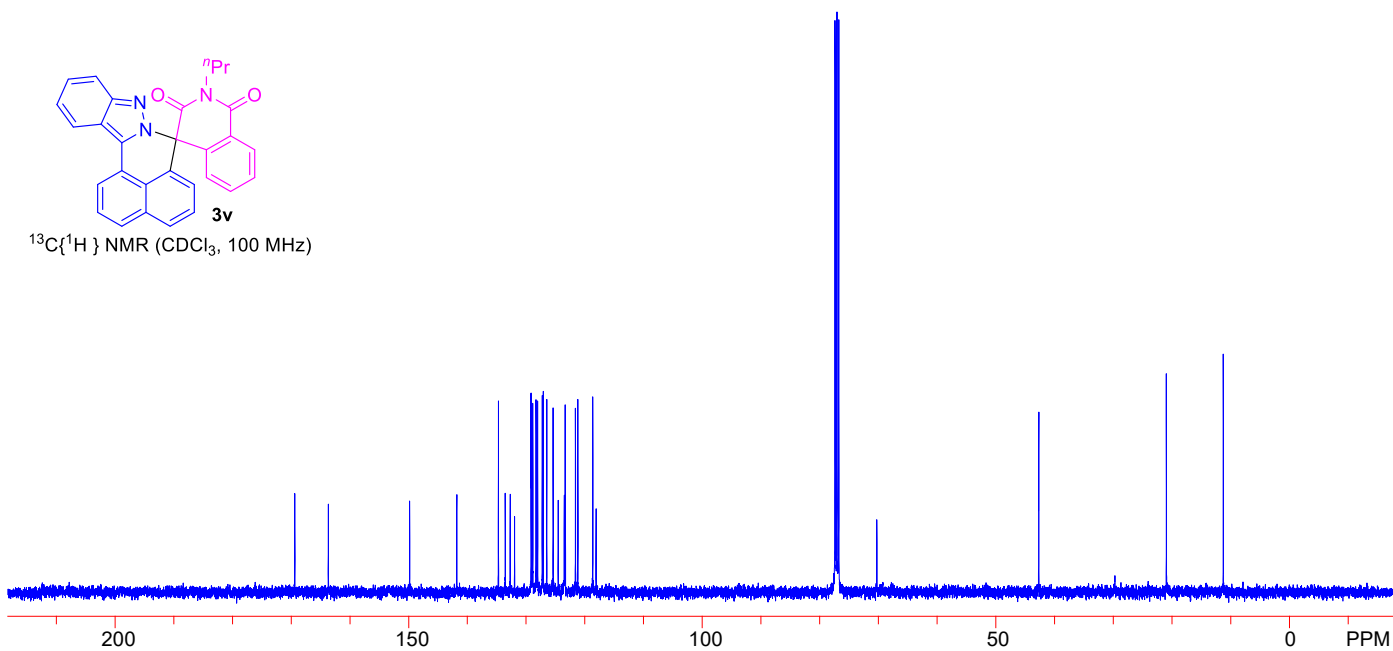

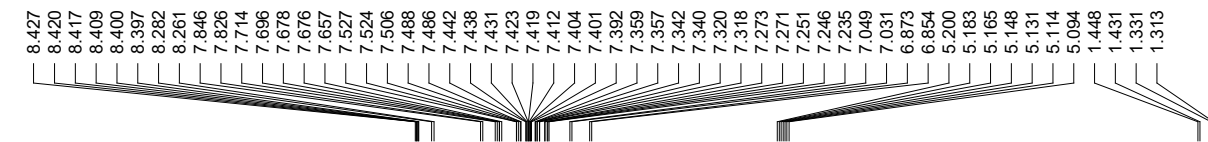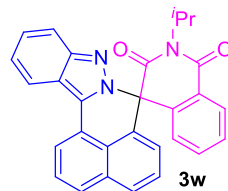

$^1\text{H}$  NMR ( $\text{CDCl}_3$ , 400 MHz)

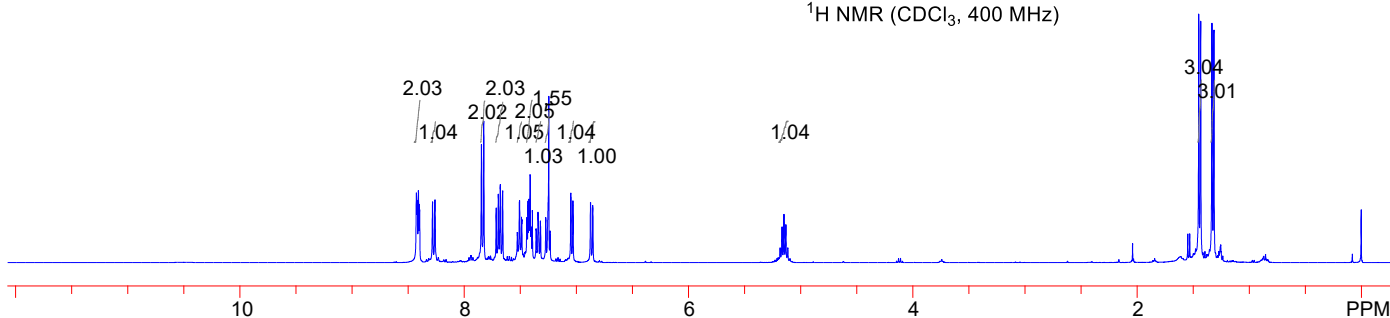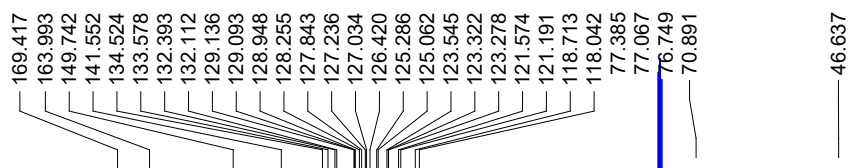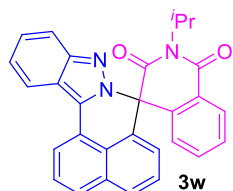

$^{13}\text{C}\{^1\text{H}\}$  NMR ( $\text{CDCl}_3$ , 100 MHz)

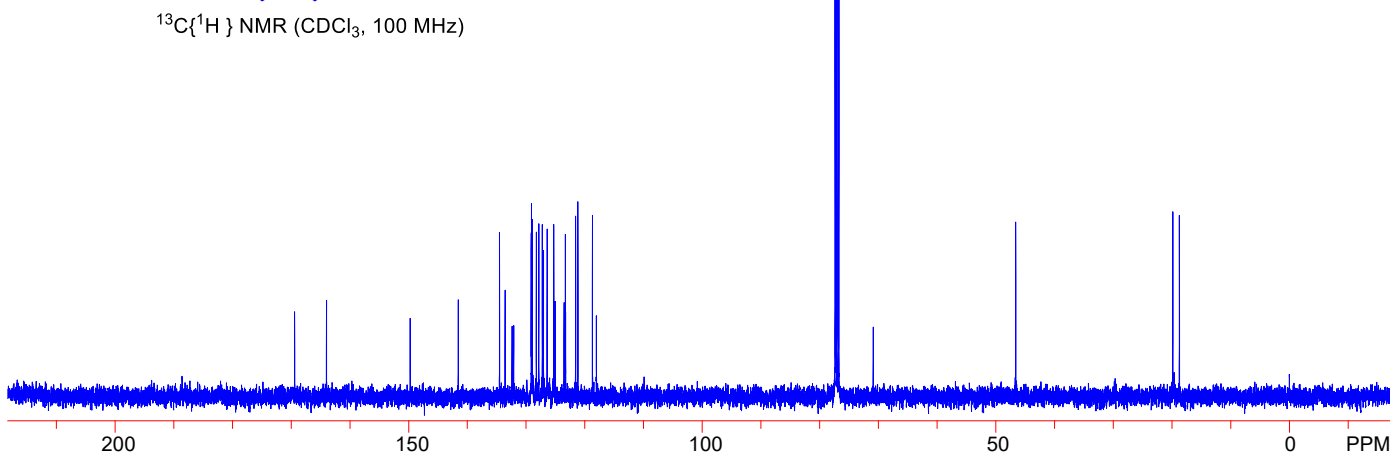

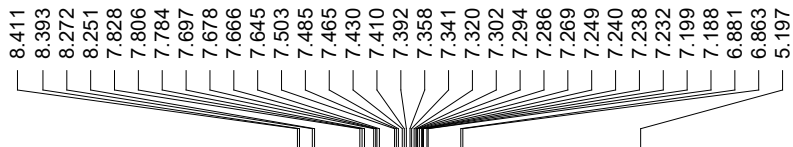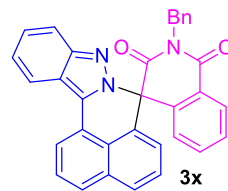

$^1\text{H}$  NMR ( $\text{CDCl}_3$ , 400 MHz)

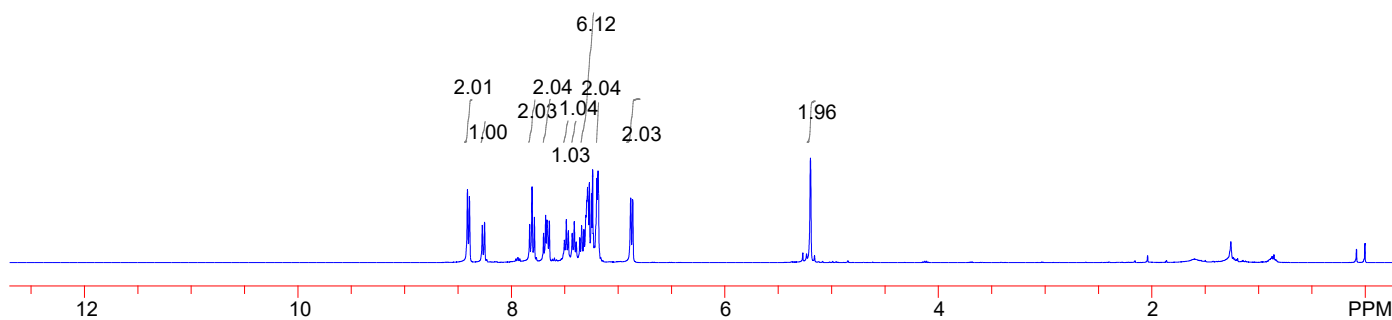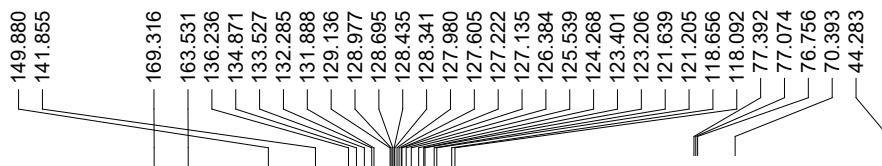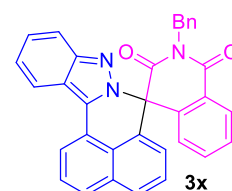

$^{13}\text{C}\{^1\text{H}\}$  NMR ( $\text{CDCl}_3$ , 100 MHz)

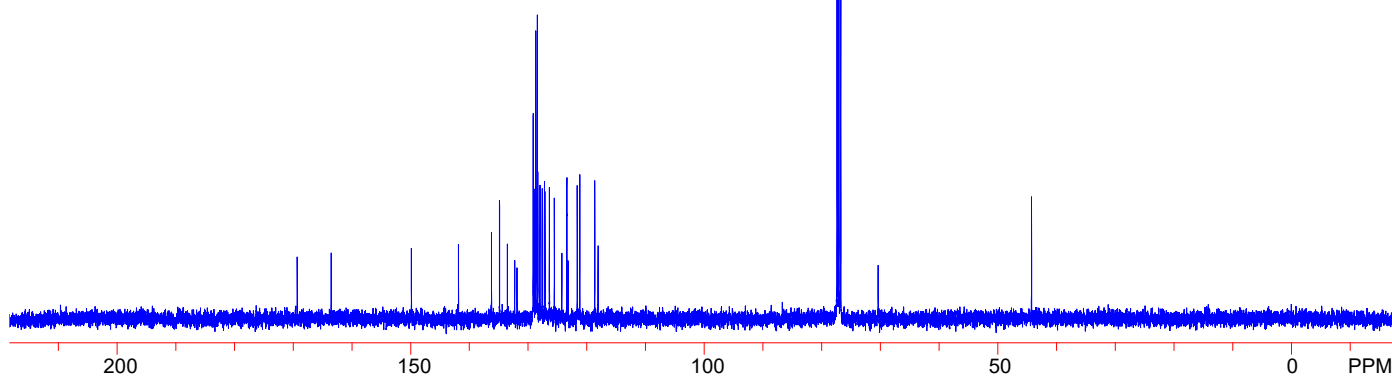

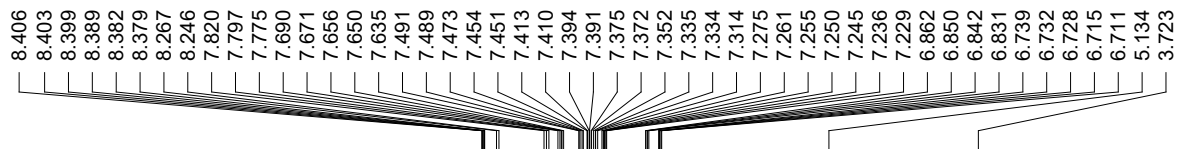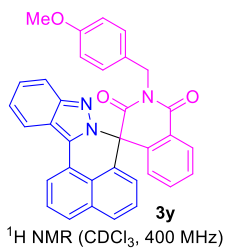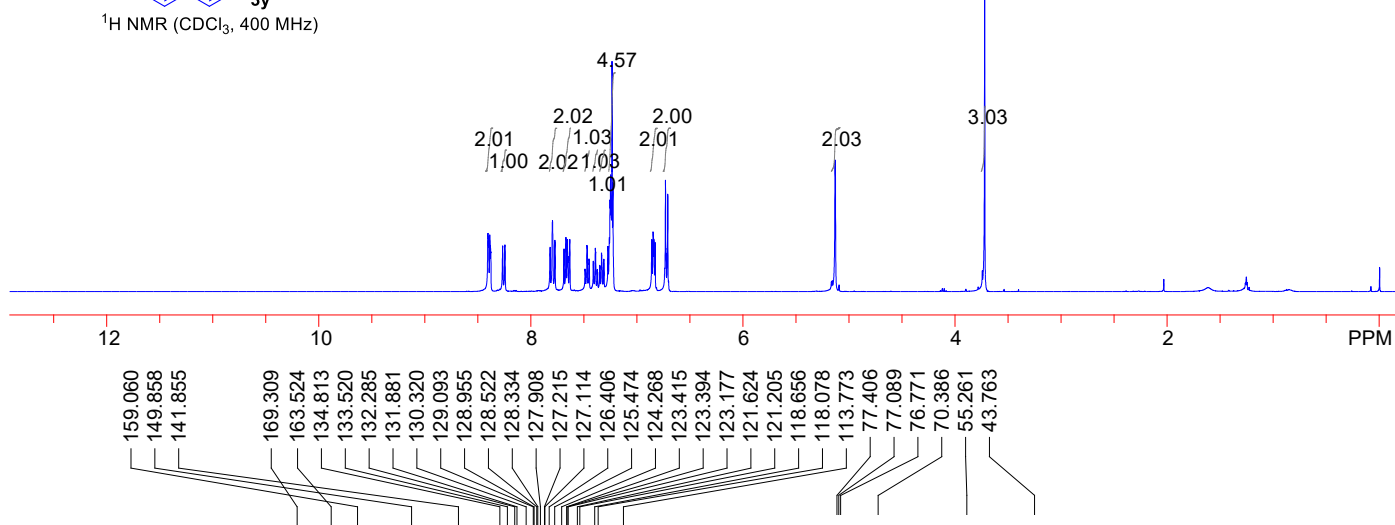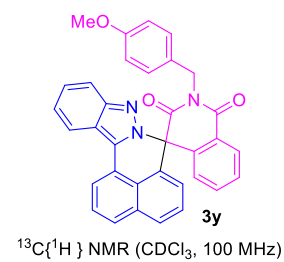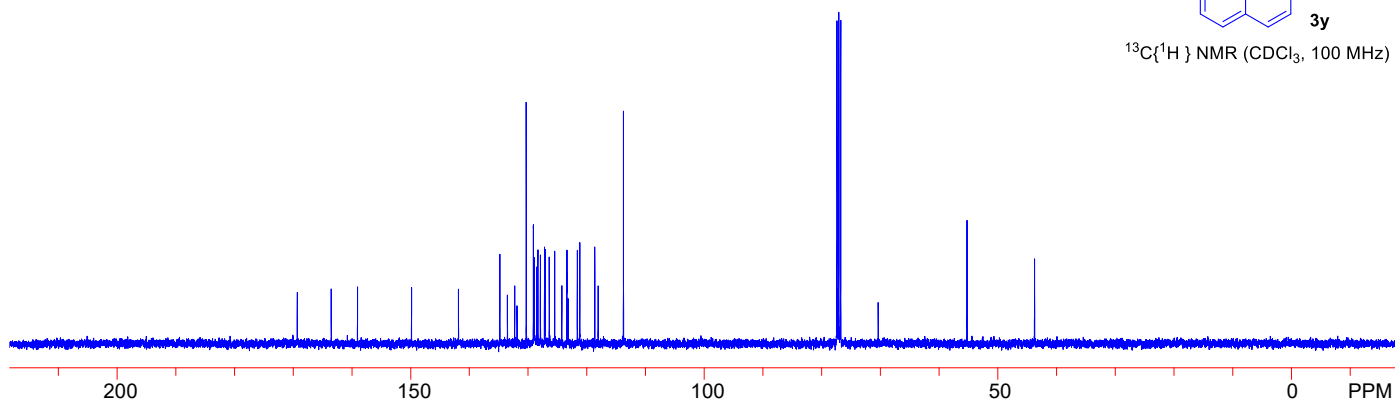

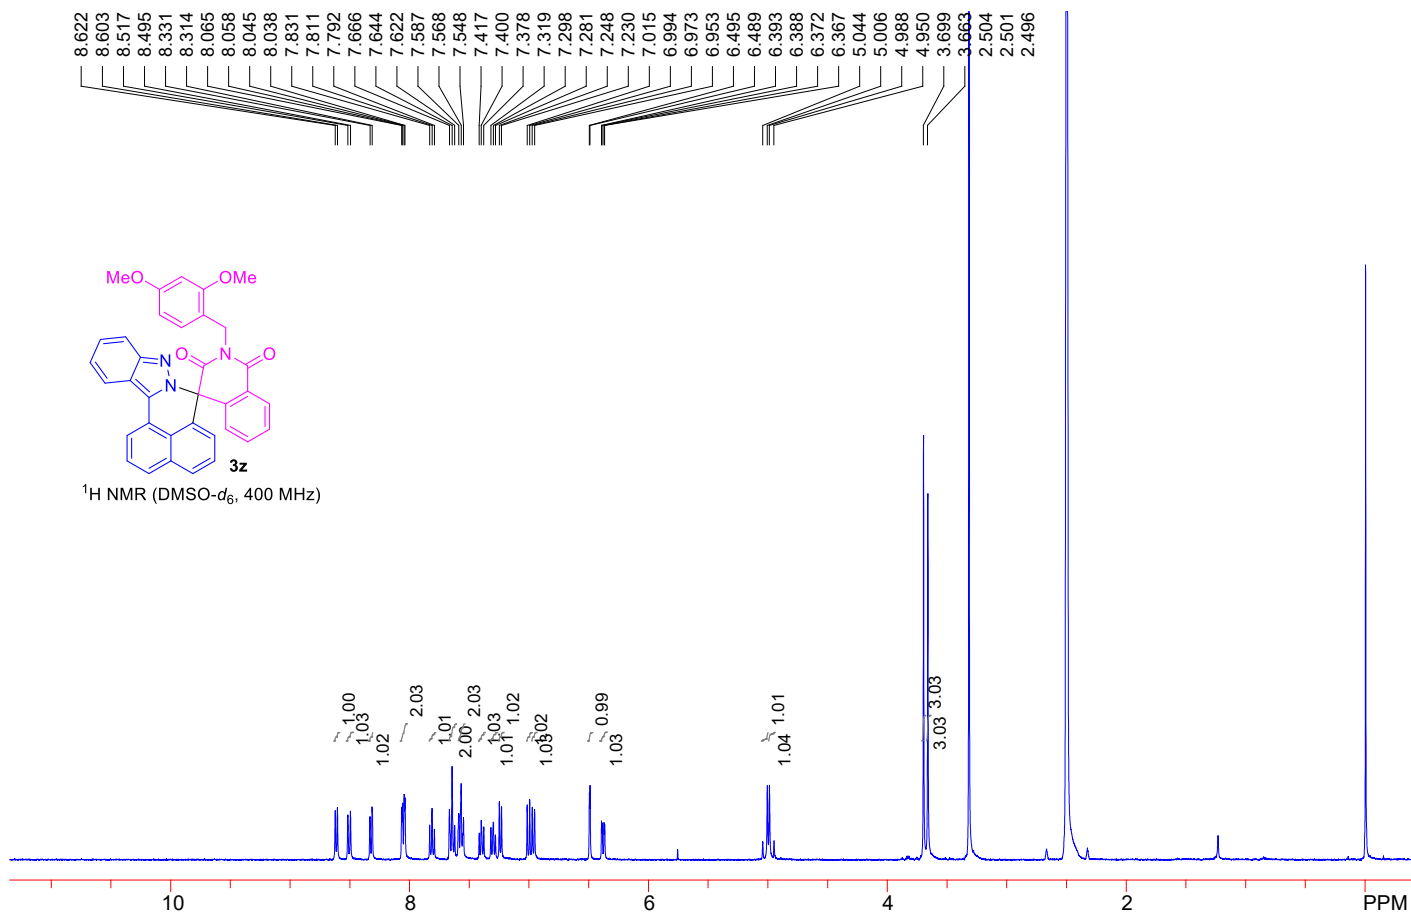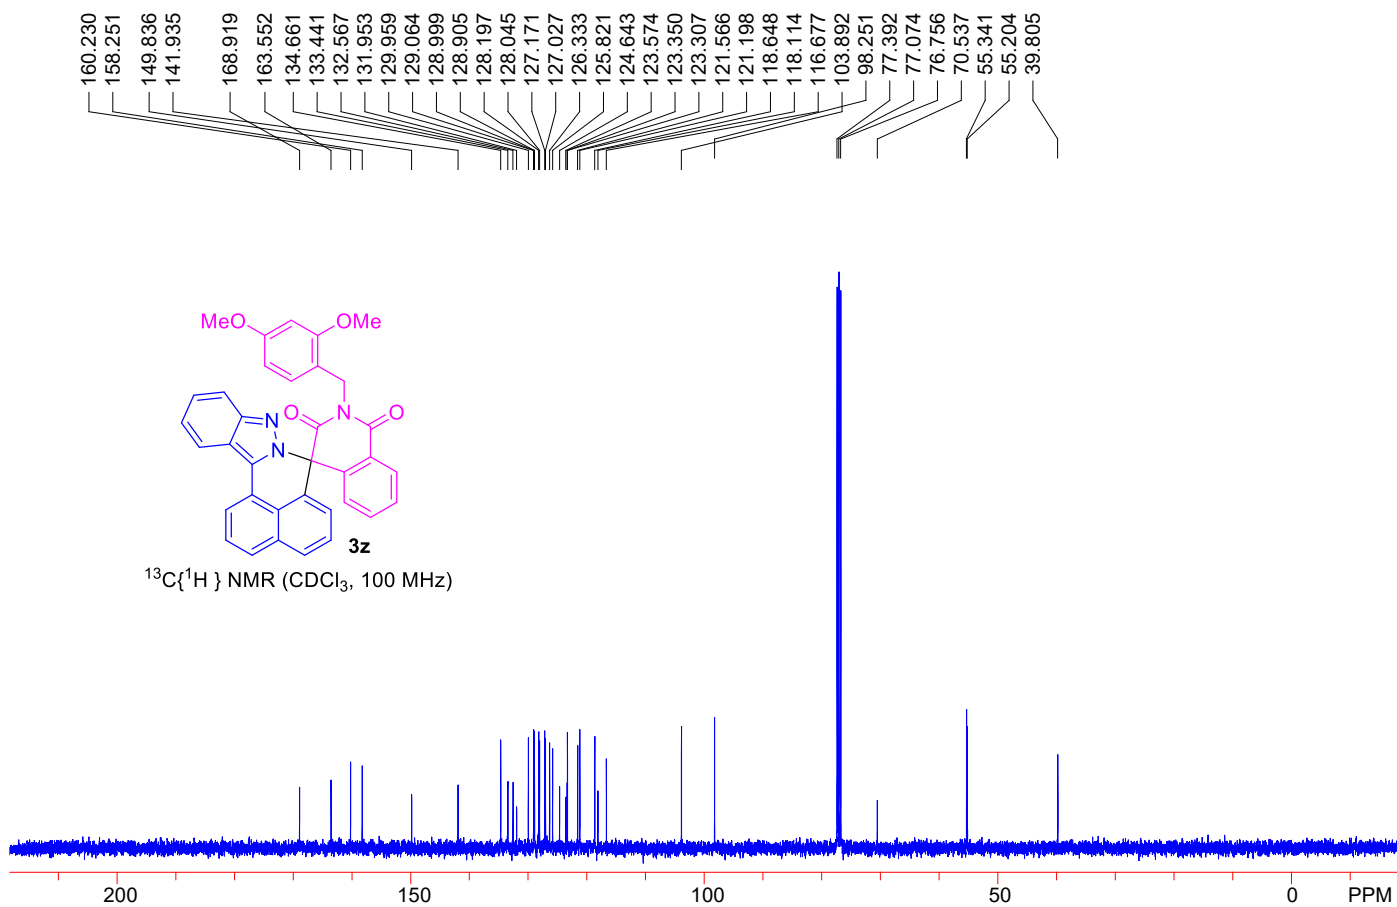

8.473  
8.470  
8.454  
8.397  
8.379  
8.253  
8.232  
7.876  
7.855  
7.841  
7.820  
7.698  
7.694  
7.675  
7.654  
7.560  
7.541  
7.538  
7.525  
7.521  
7.506  
7.501  
7.487  
7.481  
7.461  
7.411  
7.408  
7.392  
7.372  
7.363  
7.353  
7.347  
7.335  
7.325  
7.259  
7.251  
7.234  
7.222  
7.183  
7.165  
7.011  
6.992

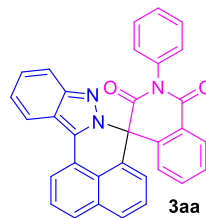

$^1\text{H NMR}$  ( $\text{CDCl}_3$ , 400 MHz)

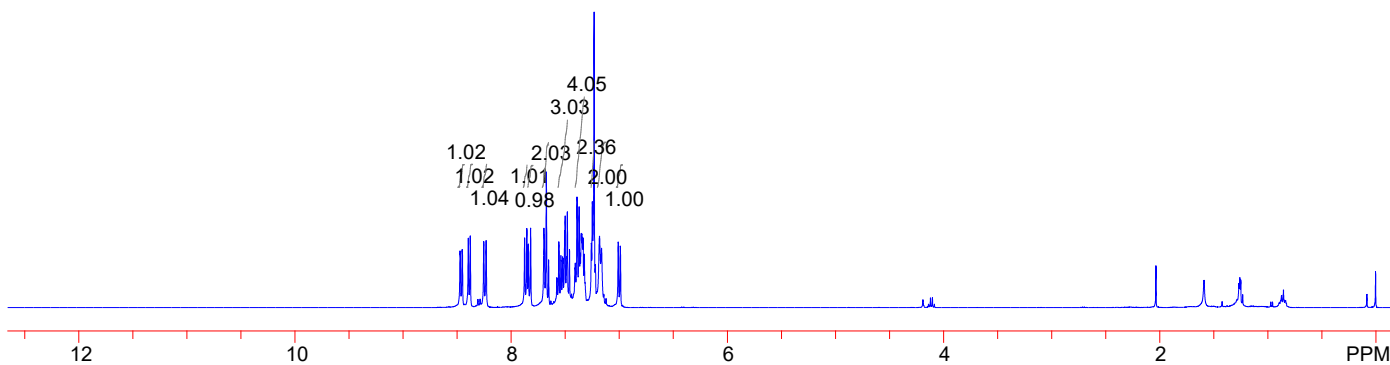

163.827  
149.938  
141.667  
135.095  
169.244  
134.546  
133.650  
132.473  
132.220  
129.418  
129.345  
129.215  
129.186  
128.840  
128.313  
127.316  
127.171  
126.528  
125.452  
124.846  
123.538  
123.415  
121.675  
121.169  
118.677  
118.136  
77.385  
77.067  
76.749  
70.993

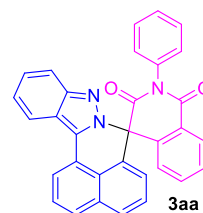

$^{13}\text{C}\{^1\text{H}\}$  NMR ( $\text{CDCl}_3$ , 100 MHz)

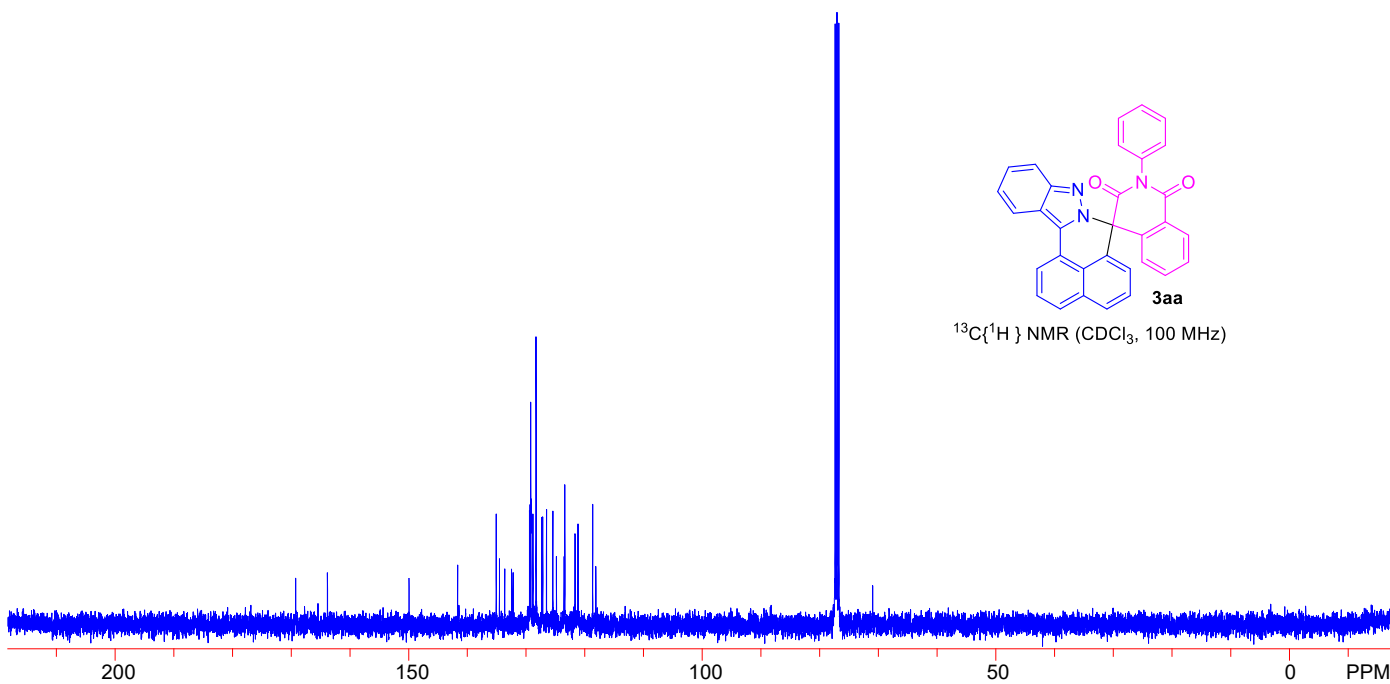

8.466  
8.446  
8.388  
8.370  
8.248  
8.226  
7.863  
7.843  
7.829  
7.809  
7.695  
7.681  
7.673  
7.662  
7.643  
7.563  
7.544  
7.525  
7.507  
7.505  
7.488  
7.469  
7.449  
7.357  
7.341  
7.319  
7.252  
7.240  
7.231  
7.222  
7.215  
7.195  
7.174  
7.061  
7.042  
6.991  
6.972  
2.309

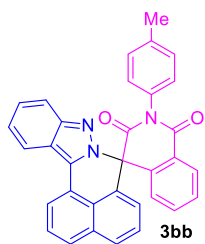

$^1\text{H}$  NMR ( $\text{CDCl}_3$ , 400 MHz)

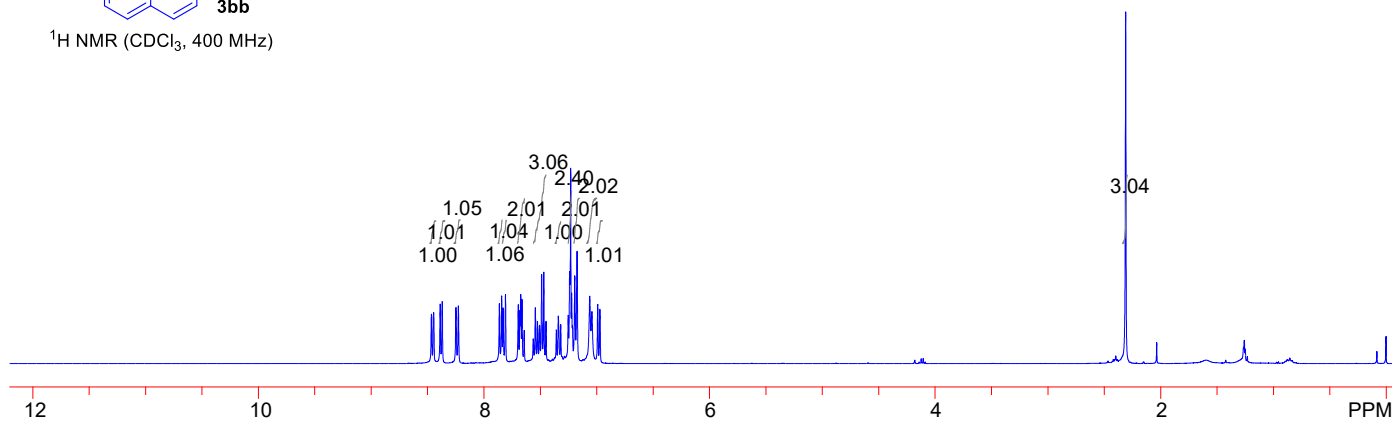

169.266  
163.935  
149.916  
141.689  
138.786  
135.037  
133.636  
132.545  
132.213  
131.866  
129.902  
129.374  
129.302  
129.194  
128.291  
128.262  
127.966  
127.301  
127.150  
126.528  
125.438  
124.867  
123.553  
123.423  
123.387  
121.653  
121.191  
118.677  
118.136  
77.414  
77.096  
76.778  
71.007  
21.235

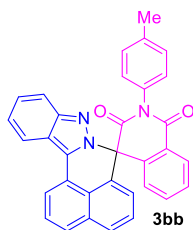

$^{13}\text{C}\{^1\text{H}\}$  NMR ( $\text{CDCl}_3$ , 100 MHz)

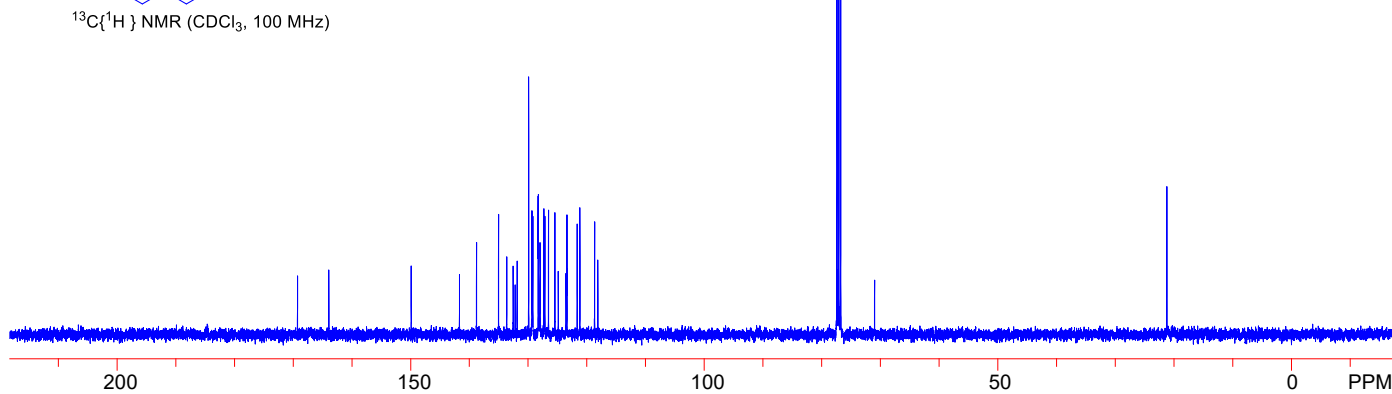

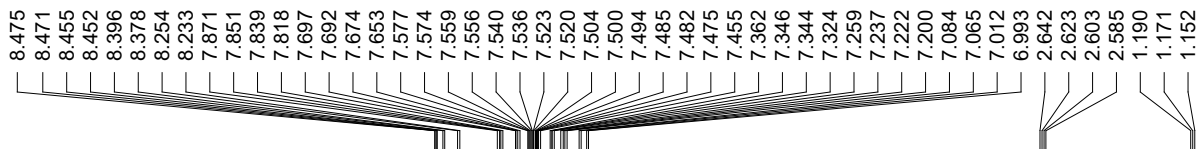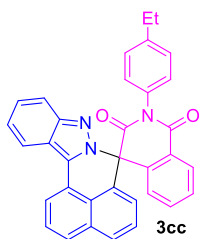

$^1\text{H}$  NMR ( $\text{CDCl}_3$ , 400 MHz)

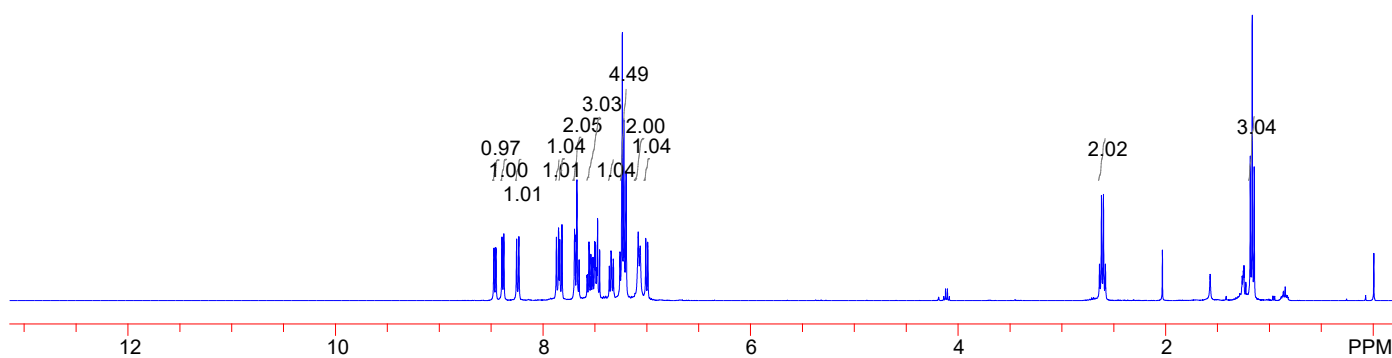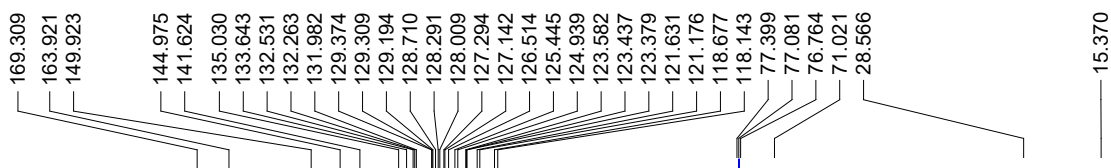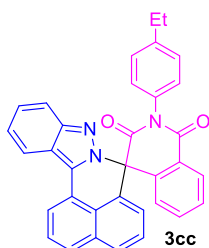

$^{13}\text{C}\{^1\text{H}\}$  NMR ( $\text{CDCl}_3$ , 100 MHz)

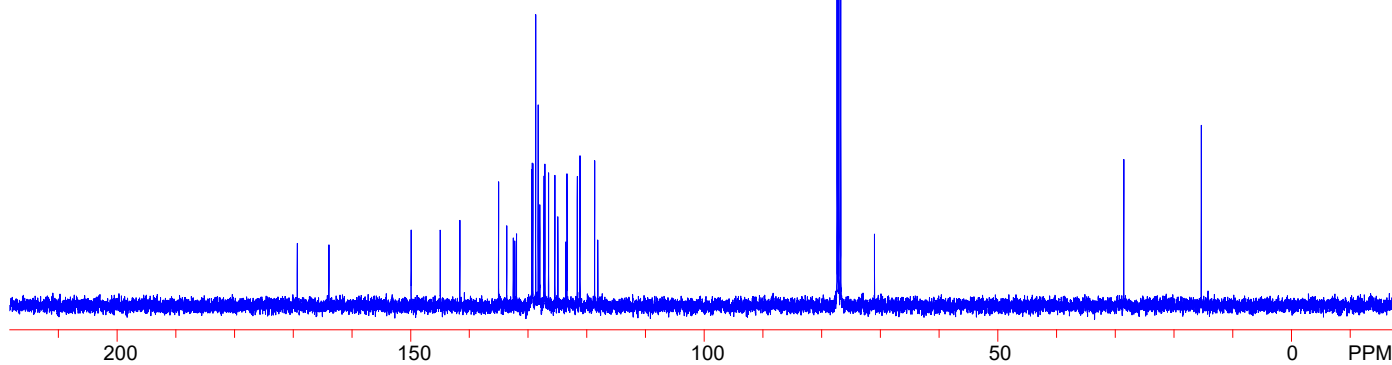

8.476  
8.459  
8.456  
8.391  
8.375  
8.250  
8.229  
7.867  
7.847  
7.834  
7.814  
7.696  
7.694  
7.687  
7.669  
7.648  
7.561  
7.558  
7.542  
7.538  
7.527  
7.523  
7.508  
7.504  
7.487  
7.468  
7.448  
7.406  
7.403  
7.384  
7.357  
7.341  
7.319  
7.255  
7.253  
7.238  
7.231  
7.218  
7.096  
7.078  
7.030  
7.028  
7.011  
7.008  
1.250

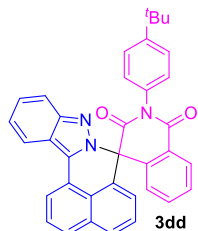

$^1\text{H NMR}$  ( $\text{CDCl}_3$ , 400 MHz)

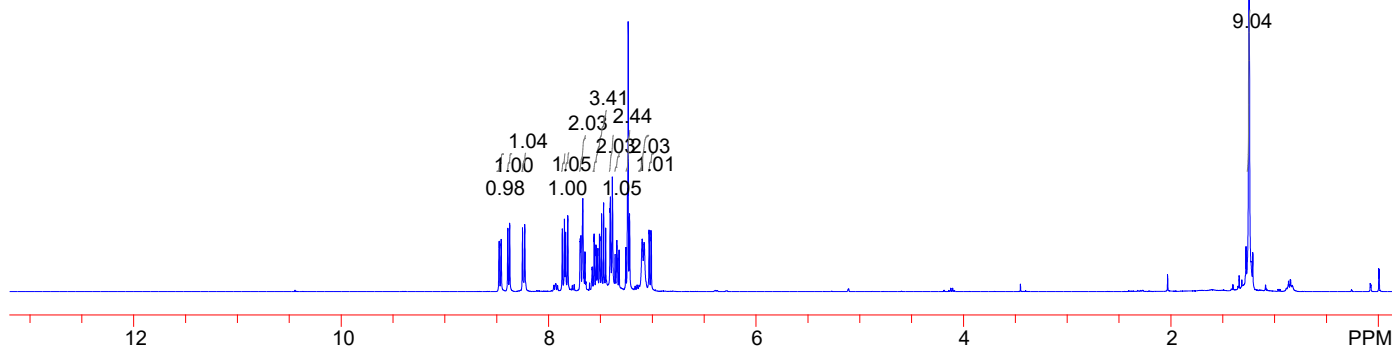

141.530  
169.403  
163.899  
151.743  
149.945  
135.051  
133.650  
132.487  
132.364  
131.736  
129.396  
129.345  
129.201  
128.341  
128.284  
127.641  
127.294  
127.164  
126.500  
126.261  
125.467  
125.033  
123.596  
123.473  
123.394  
121.639  
121.169  
118.663  
118.157  
77.406  
77.089  
76.771  
71.050  
34.691  
31.260

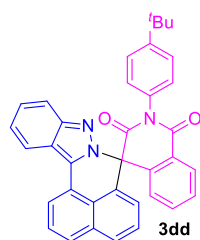

$^{13}\text{C}\{^1\text{H}\}$  NMR ( $\text{CDCl}_3$ , 100 MHz)

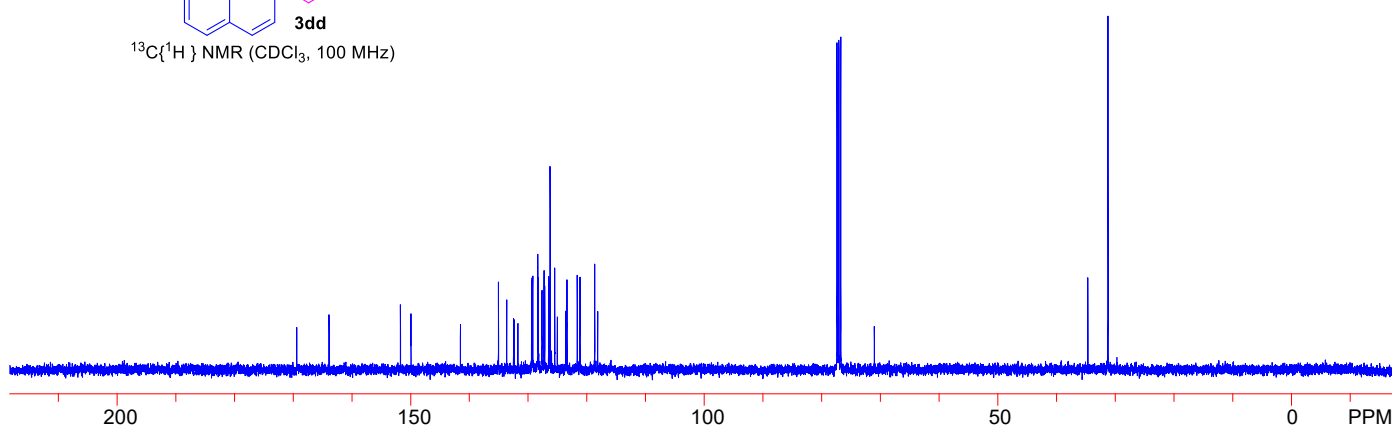

8.466  
8.453  
8.402  
8.389  
8.258  
8.244  
7.875  
7.862  
7.845  
7.831  
7.697  
7.692  
7.684  
7.677  
7.672  
7.571  
7.559  
7.546  
7.520  
7.507  
7.491  
7.478  
7.465  
7.360  
7.348  
7.334  
7.260  
7.244  
7.232  
7.219  
7.088  
7.076  
7.002  
6.989  
6.903  
6.888  
3.751

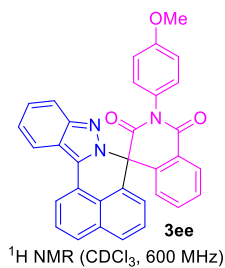

$^1\text{H NMR}$  ( $\text{CDCl}_3$ , 600 MHz)

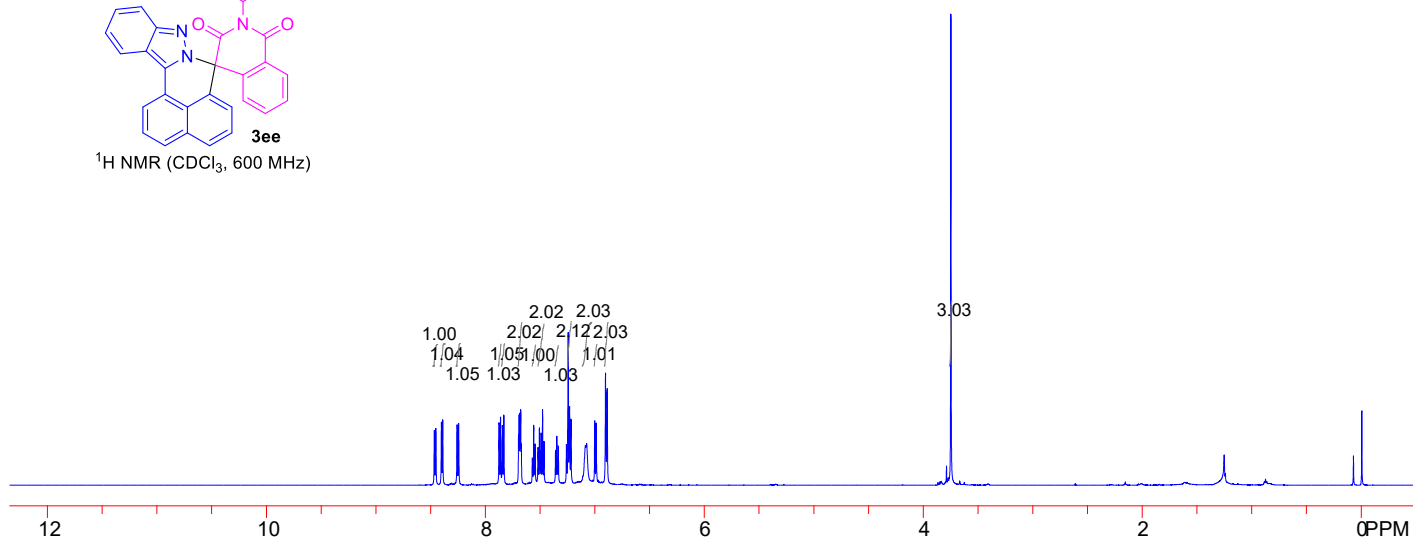

169.412  
164.038  
159.627  
149.914  
141.645  
135.031  
133.646  
132.538  
132.202  
129.373  
129.307  
129.205  
128.294  
128.272  
127.309  
127.149  
127.025  
126.515  
125.421  
124.889  
123.554  
123.423  
123.394  
121.651  
121.184  
118.669  
118.129  
114.527  
77.280  
77.069  
76.857  
71.017  
55.463

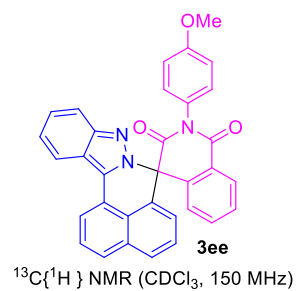

$^{13}\text{C}\{^1\text{H}\}$  NMR ( $\text{CDCl}_3$ , 150 MHz)

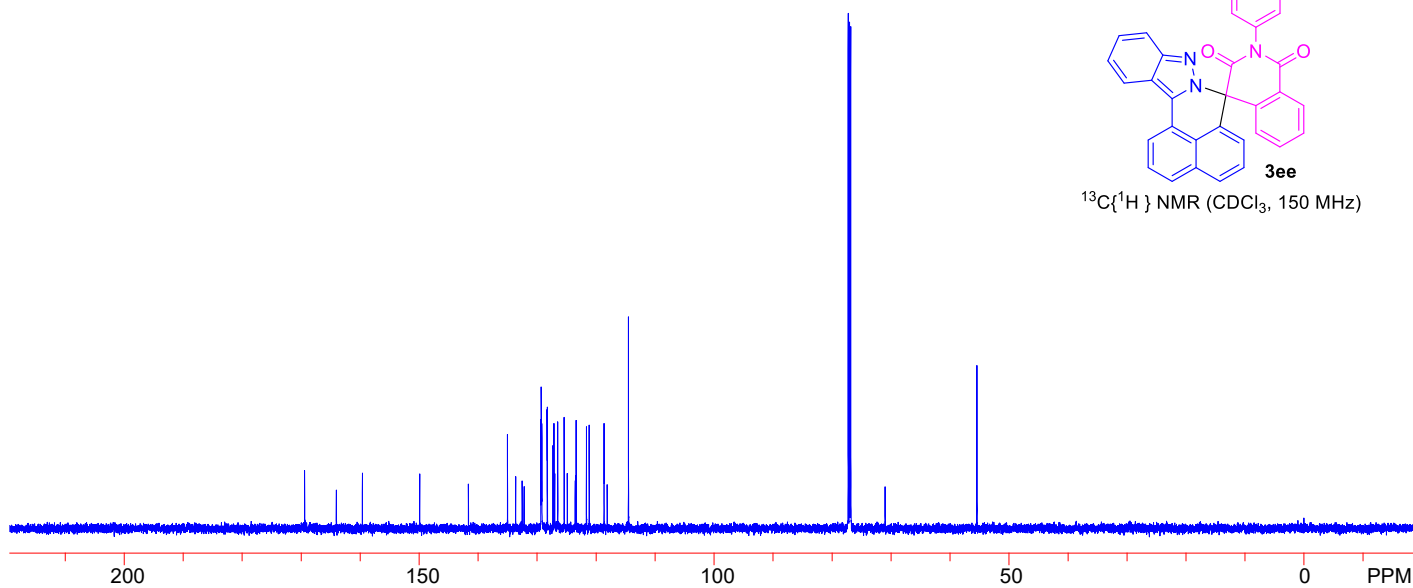

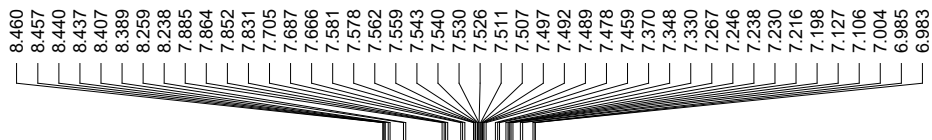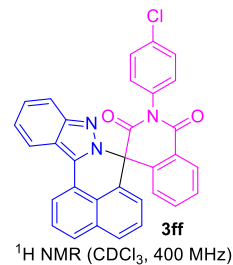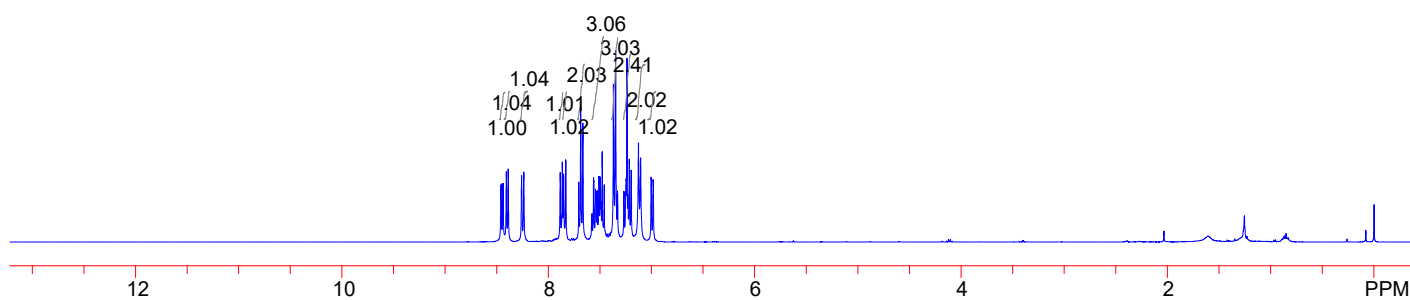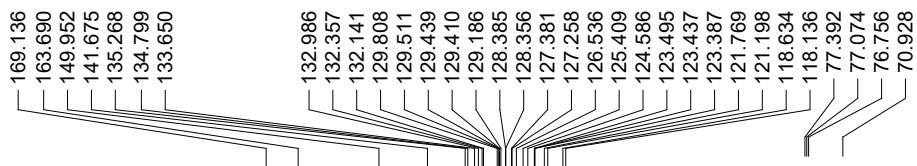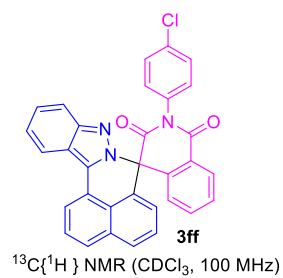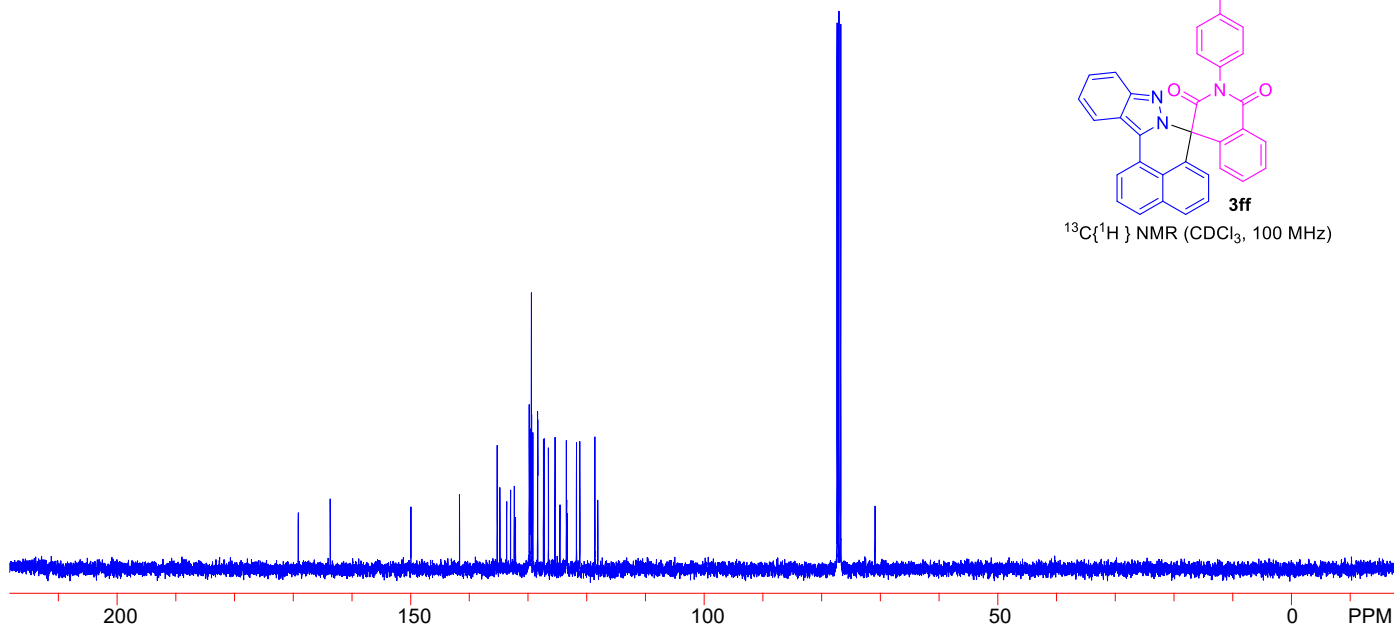

8.450  
8.430  
8.397  
8.379  
8.251  
8.230  
7.874  
7.853  
7.843  
7.820  
7.697  
7.691  
7.677  
7.658  
7.567  
7.549  
7.529  
7.515  
7.497  
7.492  
7.471  
7.466  
7.451  
7.446  
7.362  
7.359  
7.341  
7.324  
7.321  
7.260  
7.258  
7.234  
7.228  
7.220  
7.210  
7.208  
7.192  
7.189  
7.060  
7.042  
6.994  
6.974

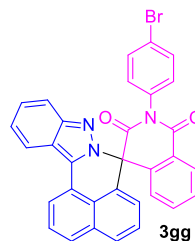

$^1\text{H}$  NMR ( $\text{CDCl}_3$ , 400 MHz)

5.06  
2.05  
2.42  
0.98  
1.00  
1.04  
1.04  
2.00  
0.96

12 10 8 6 4 2 PPM

169.071  
163.632  
149.952  
141.667  
135.268  
133.650  
133.527  
132.422  
132.343  
132.141  
130.133  
129.511  
129.410  
129.179  
128.385  
128.356  
127.381  
127.265  
126.536  
125.409  
124.564  
123.495  
123.430  
123.379  
122.903  
121.769  
121.191  
118.620  
118.128  
77.392  
77.074  
76.756  
70.920

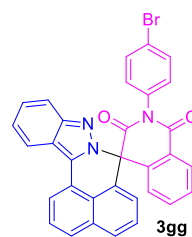

$^{13}\text{C}\{^1\text{H}\}$  NMR ( $\text{CDCl}_3$ , 100 MHz)

200 150 100 50 0 PPM

## V. NMR spectra of 5a-5n

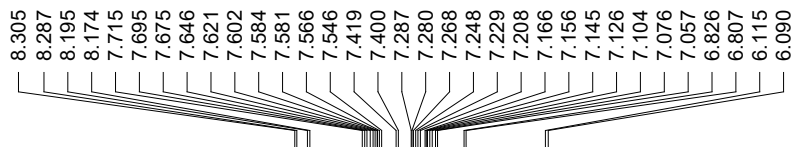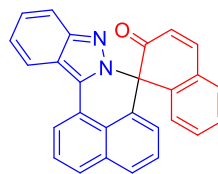

5a

$^1\text{H}$  NMR ( $\text{CDCl}_3$ , 400 MHz)

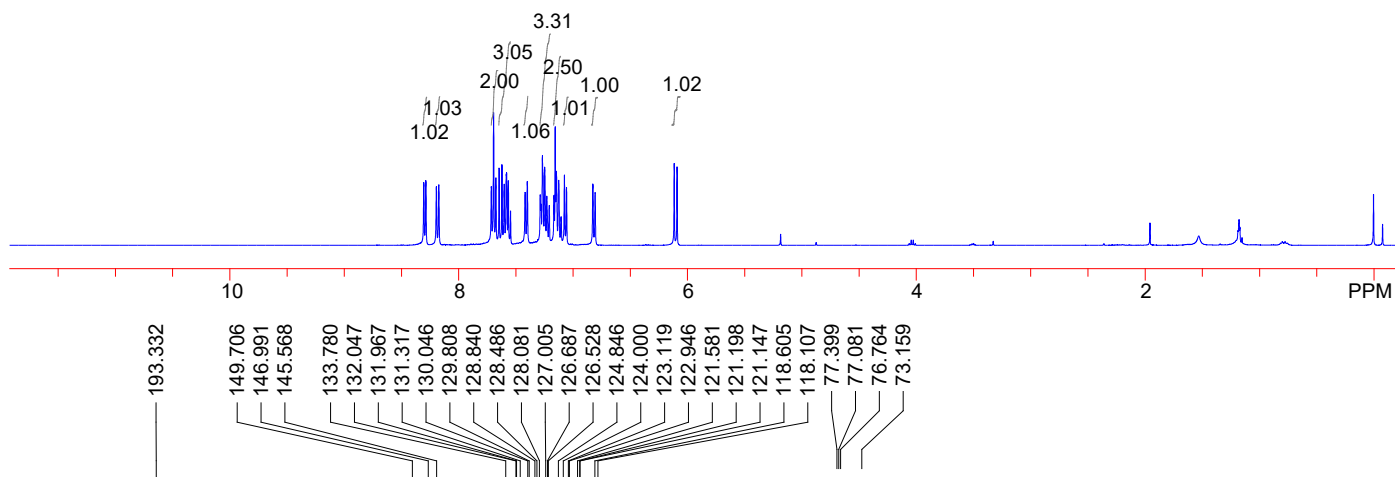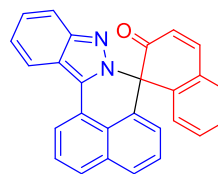

5a

$^{13}\text{C}\{^1\text{H}\}$  NMR ( $\text{CDCl}_3$ , 100 MHz)

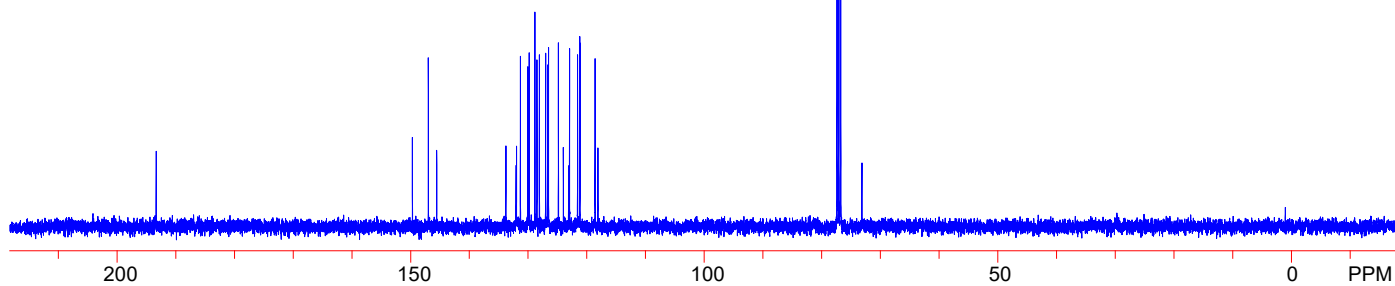



8.246  
8.242  
8.226  
8.222  
8.152  
8.132  
7.658  
7.636  
7.633  
7.580  
7.558  
7.429  
7.410  
7.307  
7.302  
7.286  
7.268  
7.250  
7.232  
7.214  
7.193  
7.183  
7.176  
7.171  
7.149  
7.129  
7.109  
7.091  
6.920  
6.903  
6.899  
6.830  
6.810  
6.139  
6.134  
6.114  
6.109  
3.971  
3.967

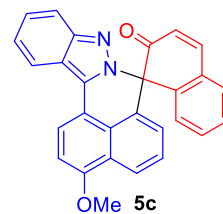

<sup>1</sup>H NMR (CDCl<sub>3</sub>, 400 MHz)

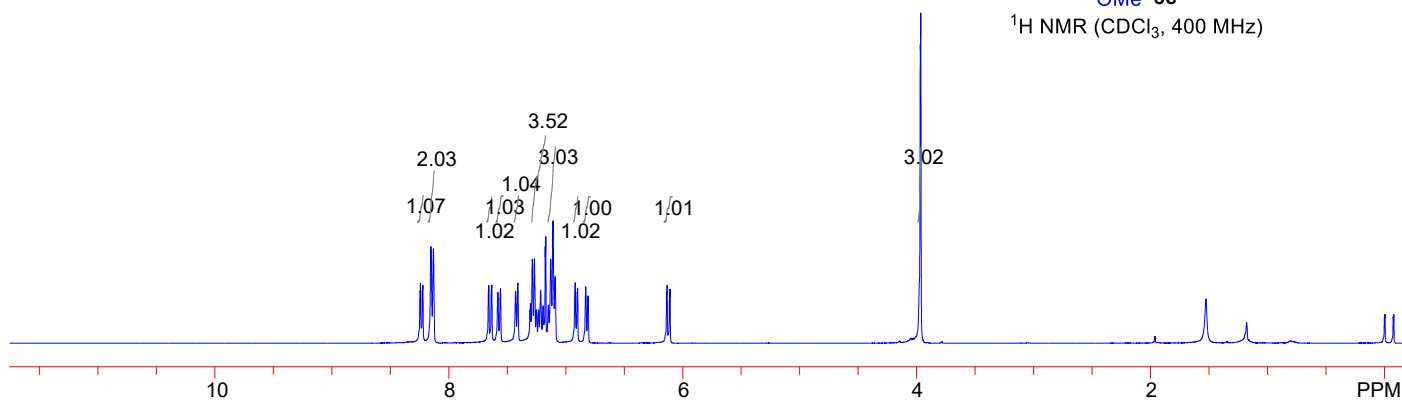

193.621  
155.600  
149.685  
146.918  
145.669  
132.422  
131.772  
131.259  
130.003  
129.822  
128.840  
128.746  
126.586  
126.023  
125.936  
125.510  
124.253  
122.679  
122.260  
121.891  
121.754  
121.270  
118.374  
117.363  
116.850  
104.737  
77.377  
77.060  
76.742  
72.755  
55.832

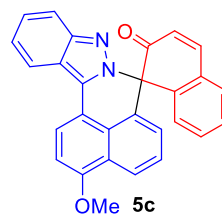

<sup>13</sup>C{<sup>1</sup>H} NMR (CDCl<sub>3</sub>, 100 MHz)

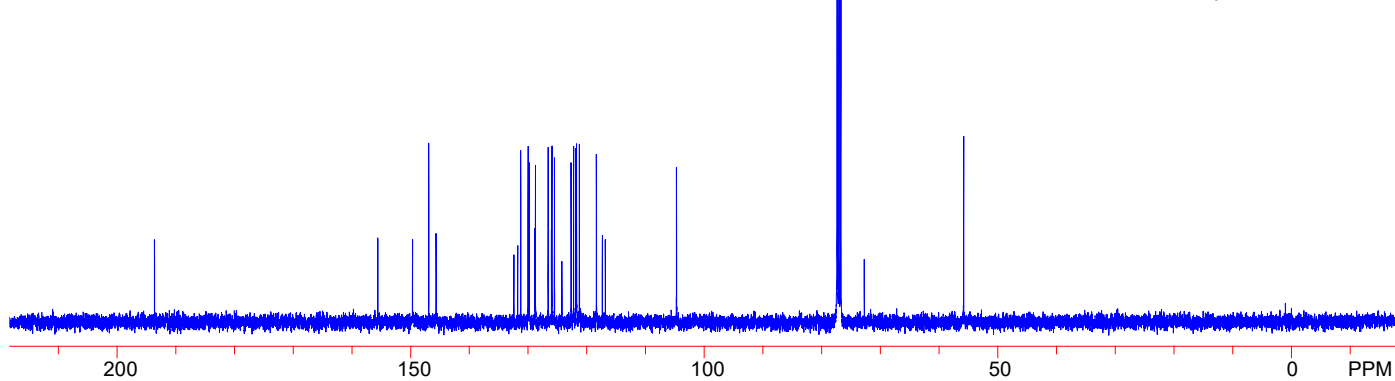

8.239  
8.237  
8.229  
8.218  
8.216  
8.209  
7.982  
7.962  
7.765  
7.740  
7.687  
7.665  
7.544  
7.525  
7.506  
7.487  
7.466  
7.412  
7.410  
7.393  
7.391  
7.374  
7.372  
7.345  
7.343  
7.328  
7.326  
7.307  
7.275  
7.273  
7.266  
7.256  
7.247  
7.238  
7.228  
7.225  
7.217  
7.198  
6.898  
6.879  
6.208  
6.183

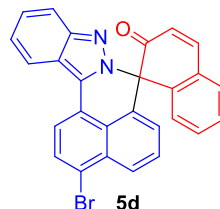

$^1\text{H}$  NMR ( $\text{CDCl}_3$ , 400 MHz)

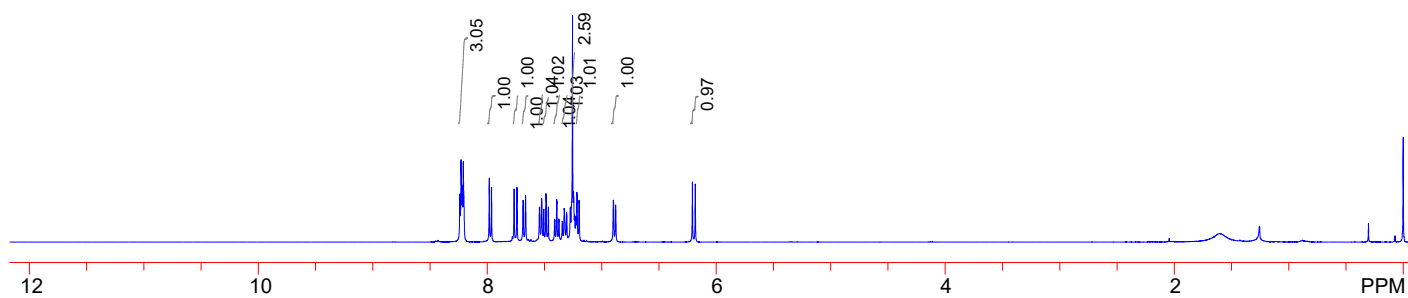

192.971  
149.779  
147.063  
145.170  
132.567  
132.321  
131.411  
131.303  
131.064  
130.133  
129.865  
129.035  
128.919  
127.944  
127.735  
126.825  
125.900  
124.268  
123.964  
123.264  
122.375  
121.451  
121.205  
120.974  
118.699  
118.157  
77.356  
77.038  
76.720  
72.769

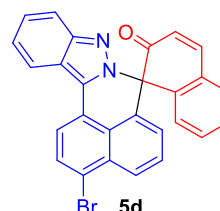

$^{13}\text{C}\{^1\text{H}\}$  NMR ( $\text{CDCl}_3$ , 100 MHz)

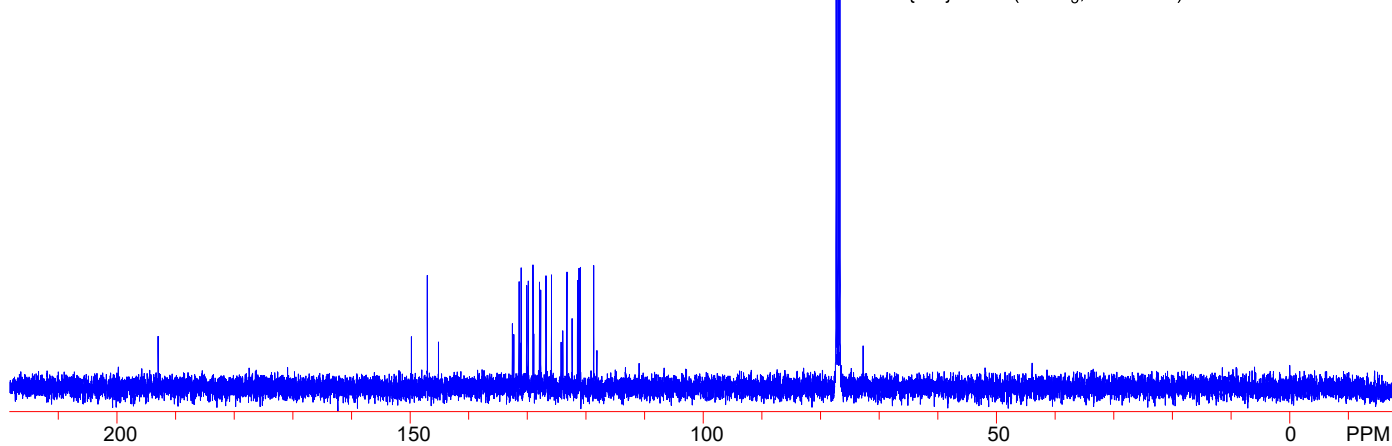

8.414  
8.396  
8.292  
8.271  
7.871  
7.850  
7.744  
7.719  
7.694  
7.672  
7.606  
7.587  
7.585  
7.567  
7.521  
7.502  
7.390  
7.388  
7.371  
7.353  
7.351  
7.335  
7.325  
7.320  
7.305  
7.289  
7.269  
7.250  
7.237  
7.217  
7.174  
7.155  
6.975  
6.956  
6.214  
6.189  
2.435

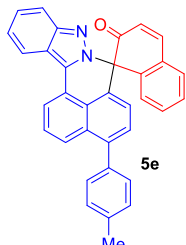

<sup>1</sup>H NMR (CDCl<sub>3</sub>, 400 MHz)

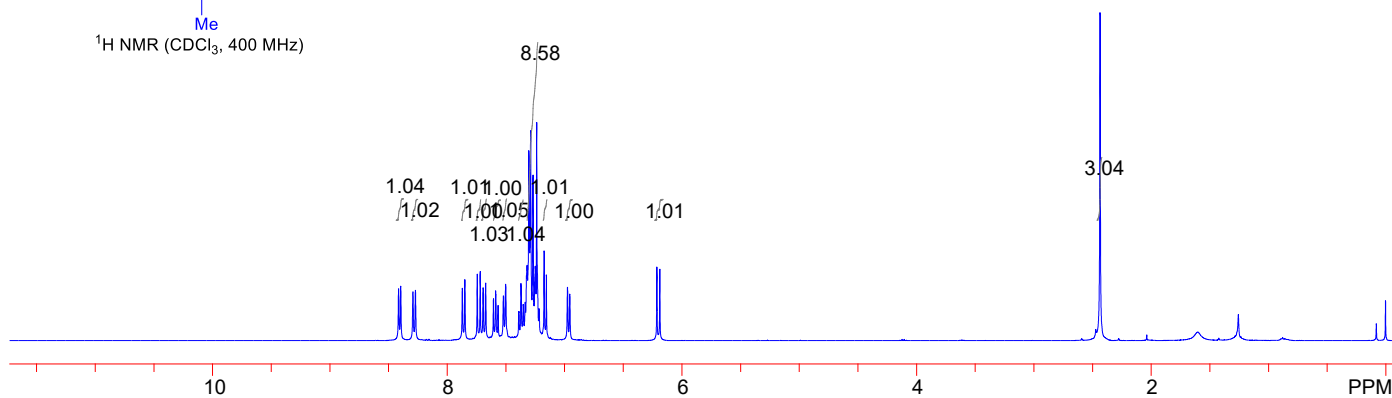

193.361  
149.793  
147.012  
145.517  
140.988  
137.507  
136.908  
132.227  
131.353  
130.884  
130.060  
129.930  
129.880  
129.150  
128.991  
128.883  
127.482  
126.882  
126.680  
126.593  
124.499  
124.159  
123.473  
122.924  
121.574  
121.249  
121.198  
118.620  
118.164  
77.392  
77.074  
76.756  
73.181  
21.285

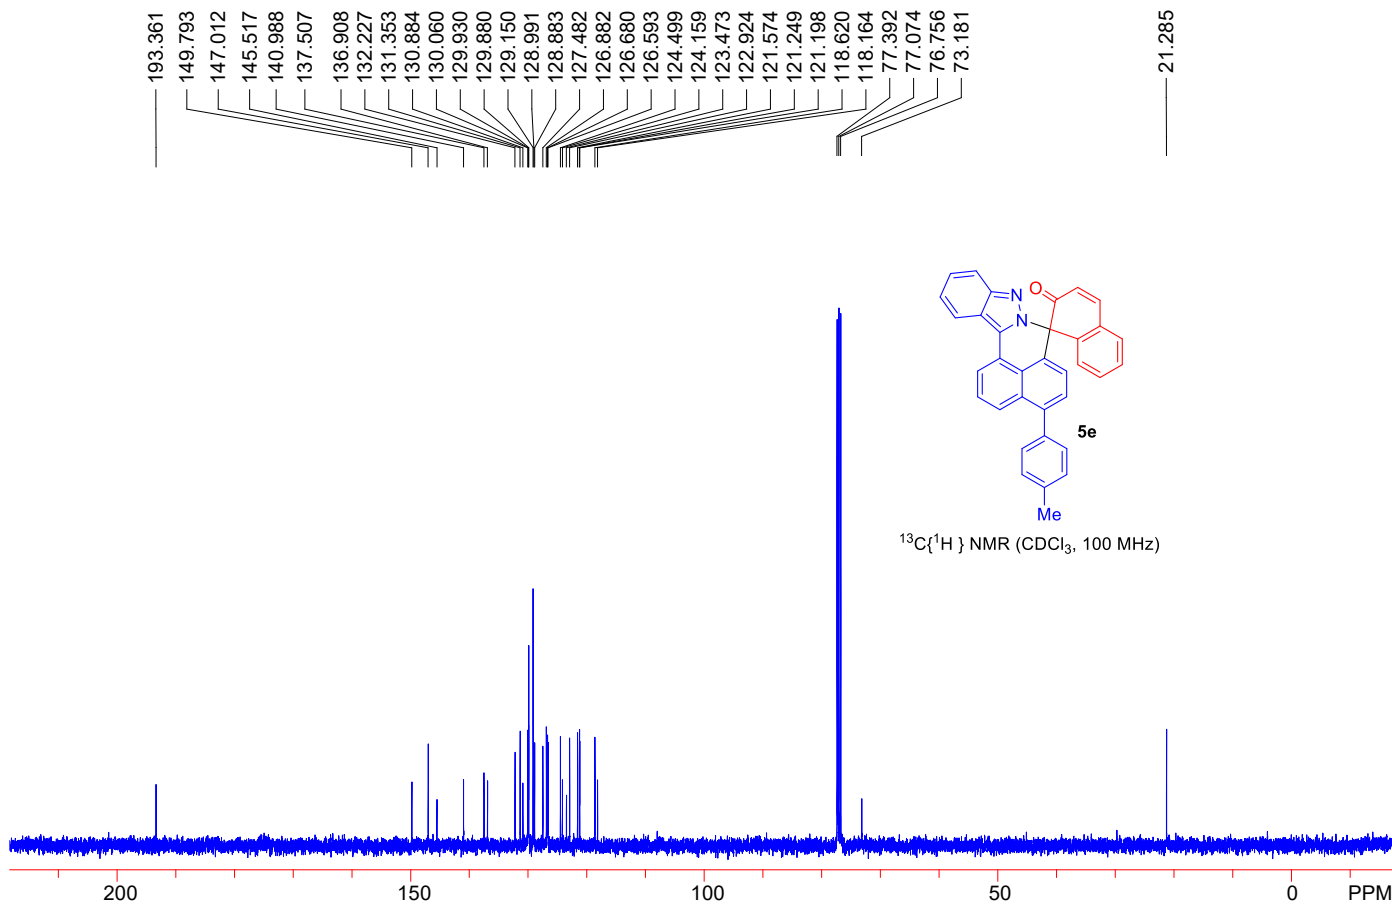

<sup>13</sup>C{<sup>1</sup>H} NMR (CDCl<sub>3</sub>, 100 MHz)

8.568  
8.553  
8.532  
8.516  
8.502  
8.493  
8.348  
8.327  
7.959  
7.949  
7.936  
7.680  
7.655  
7.634  
7.612  
7.583  
7.566  
7.557  
7.548  
7.461  
7.441  
7.421  
7.292  
7.290  
7.279  
7.273  
7.271  
7.265  
7.263  
7.254  
7.244  
7.224  
7.222  
7.203  
7.186  
7.172  
7.161  
7.154  
7.143  
7.124  
7.105  
7.103  
6.816  
6.797  
6.170  
6.145

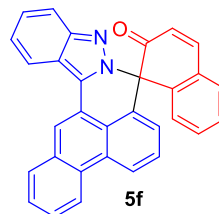

$^1\text{H}$  NMR ( $\text{CDCl}_3$ , 400 MHz)

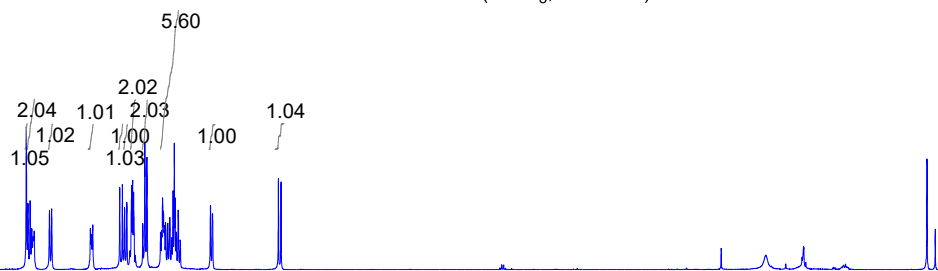

12 10 8 6 4 2 PPM

132.567  
193.599  
132.032  
149.750  
147.041  
145.308  
131.794  
131.339  
131.144  
130.075  
129.916  
129.793  
129.230  
128.984  
128.876  
127.829  
127.417  
127.272  
126.767  
125.264  
123.192  
122.968  
122.917  
122.318  
122.000  
121.949  
121.314  
118.634  
118.150  
77.392  
77.074  
76.756  
72.719

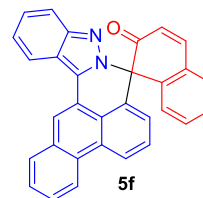

$^{13}\text{C}\{^1\text{H}\}$  NMR ( $\text{CDCl}_3$ , 100 MHz)

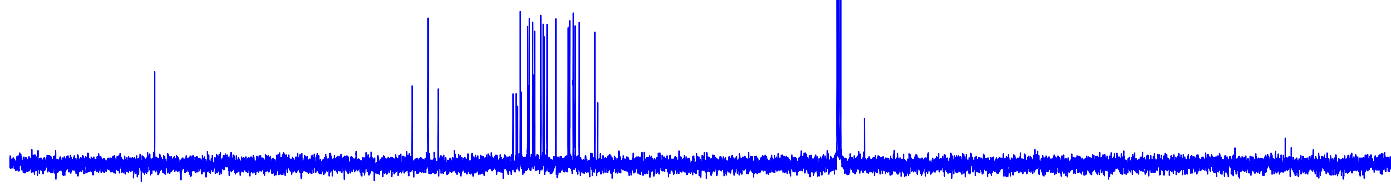

200 150 100 50 0 PPM

8.905  
8.885  
8.425  
8.404  
8.352  
8.332  
8.147  
8.144  
8.129  
8.126  
8.066  
8.043  
8.029  
8.007  
7.969  
7.953  
7.939  
7.921  
7.902  
7.842  
7.817  
7.719  
7.711  
7.698  
7.612  
7.593  
7.439  
7.436  
7.420  
7.417  
7.401  
7.399  
7.358  
7.341  
7.322  
7.320  
7.299  
7.297  
7.277  
7.251  
7.239  
7.091  
7.072  
6.256  
6.231

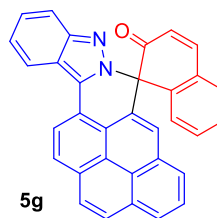

$^1\text{H NMR}$  ( $\text{CDCl}_3$ , 400 MHz)

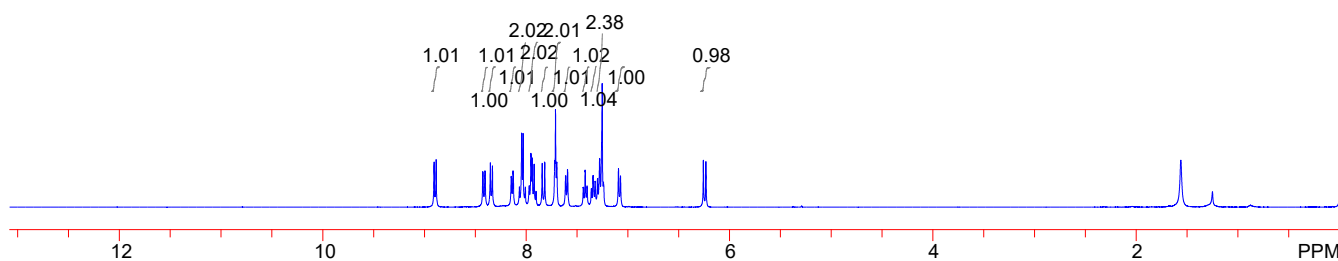

192.971  
149.966  
146.976  
145.553  
132.798  
131.433  
131.288  
131.014  
130.544  
130.097  
130.010  
129.049  
128.977  
127.619  
127.576  
126.738  
126.666  
126.514  
126.463  
126.102  
125.640  
124.918  
124.116  
123.062  
121.798  
121.516  
121.321  
121.111  
120.346  
118.713  
118.526  
77.356  
77.038  
76.720  
73.463

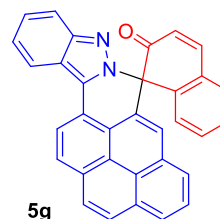

$^{13}\text{C}\{^1\text{H}\}$  NMR ( $\text{CDCl}_3$ , 100 MHz)

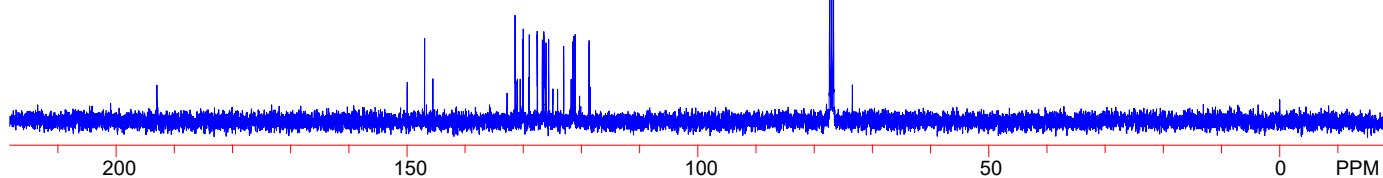

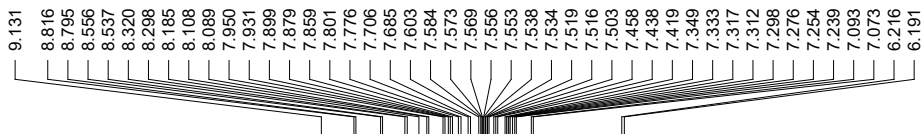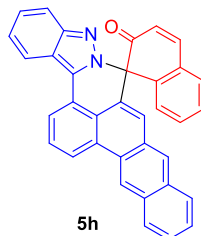

$^1\text{H}$  NMR ( $\text{CDCl}_3$ , 400 MHz)

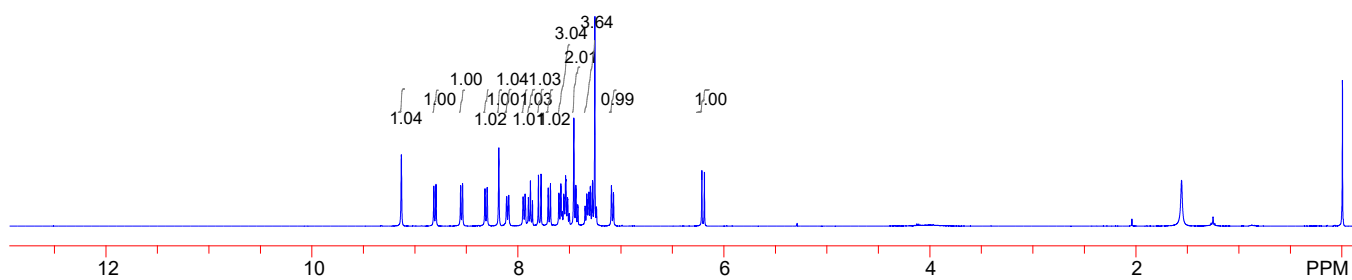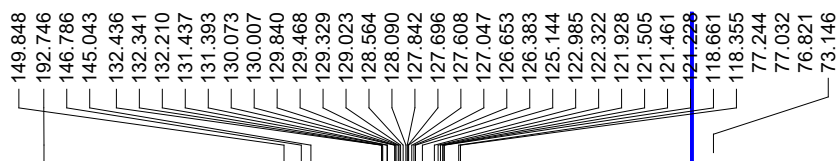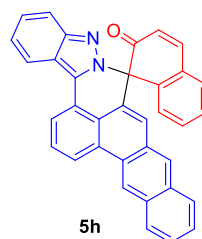

$^{13}\text{C}\{^1\text{H}\}$  NMR ( $\text{CDCl}_3$ , 150 MHz)

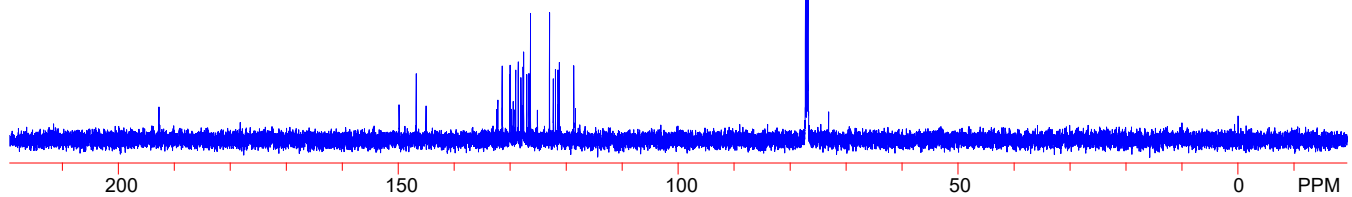

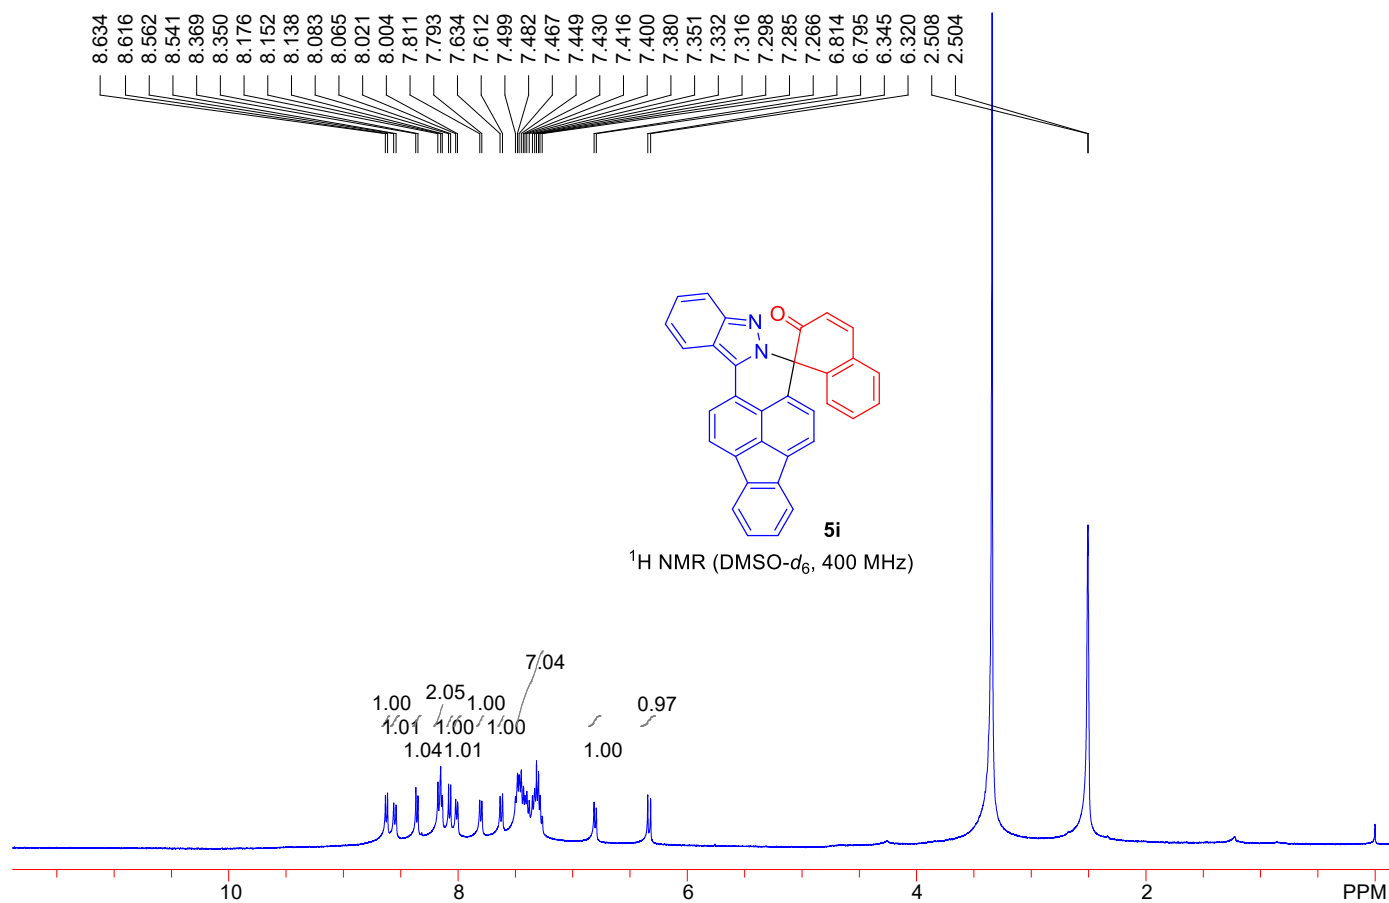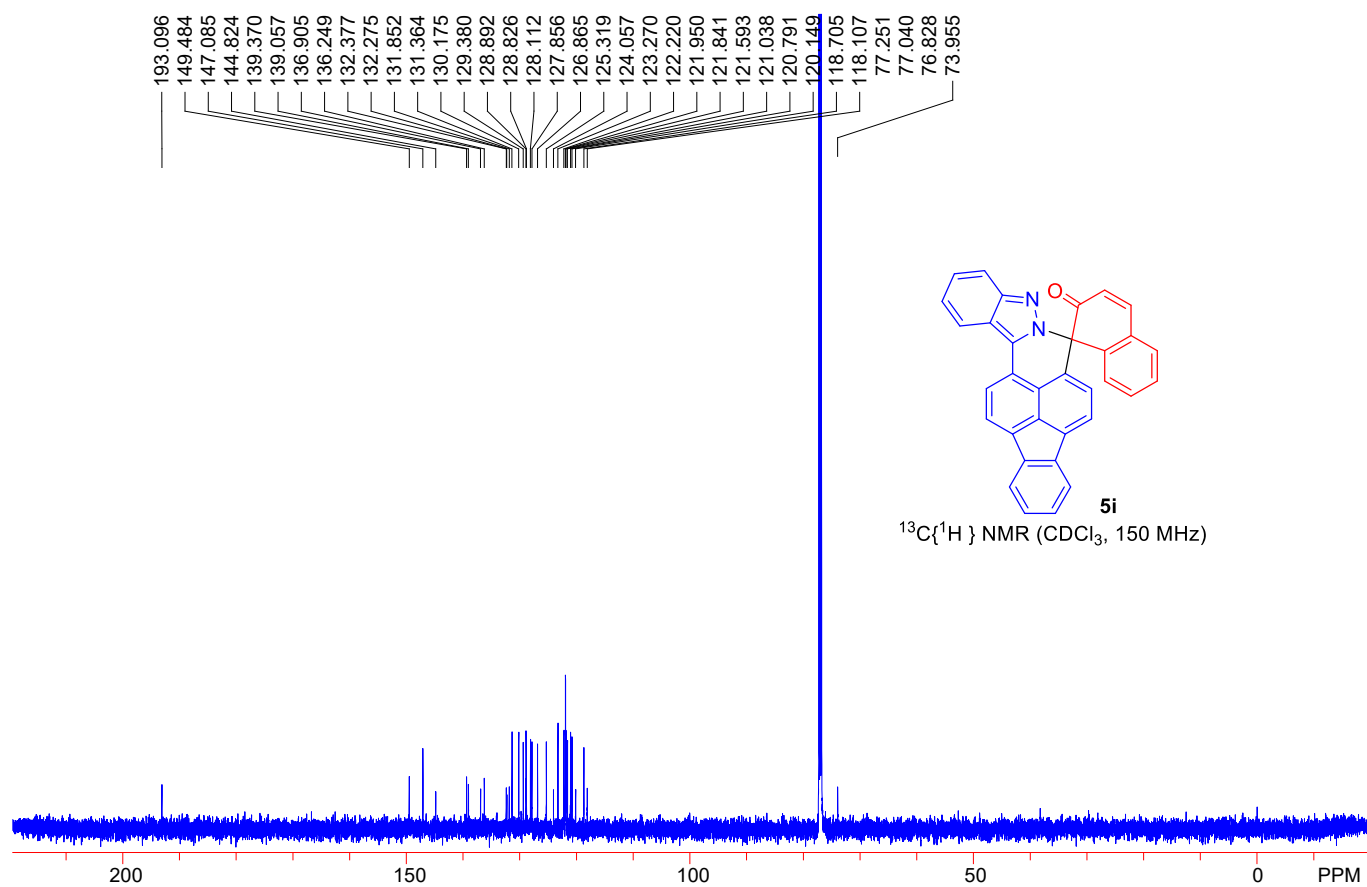

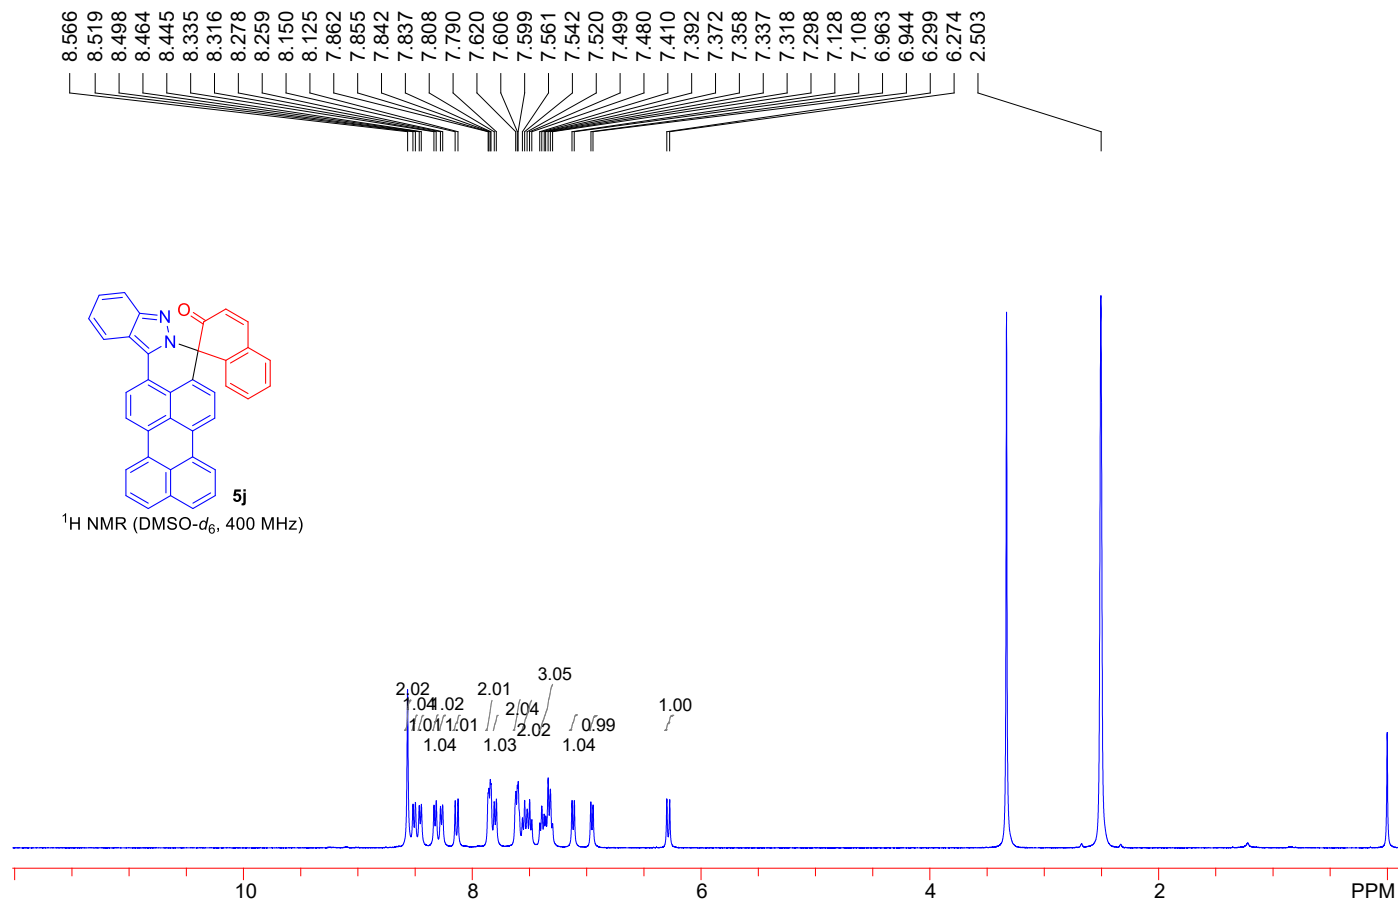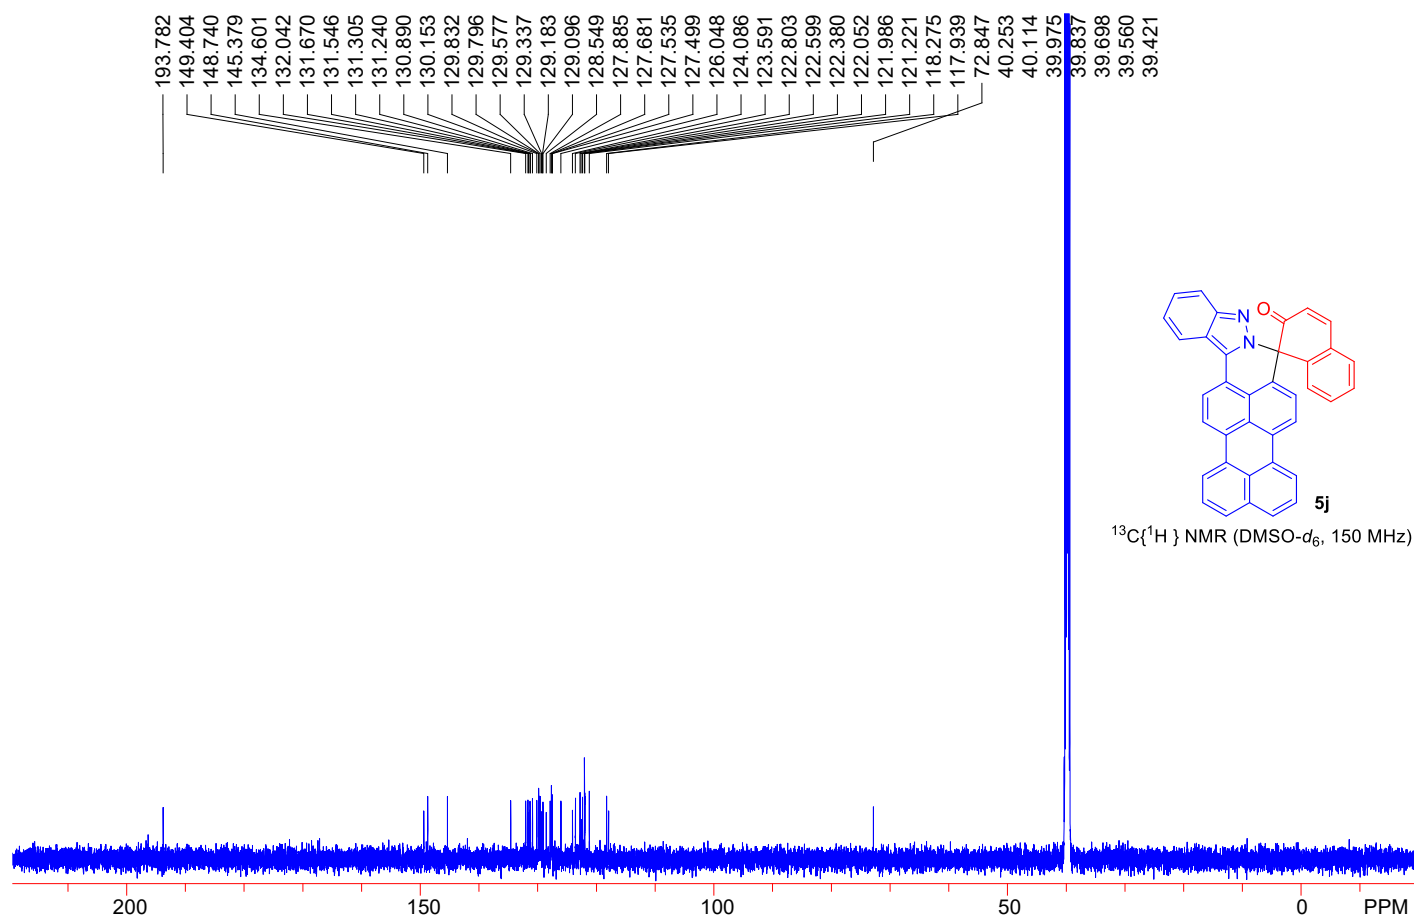

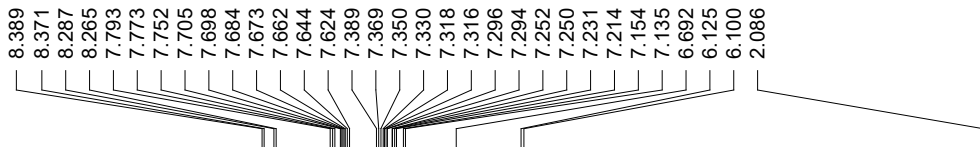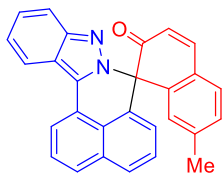

**5k**

$^1\text{H}$  NMR ( $\text{CDCl}_3$ , 400 MHz)

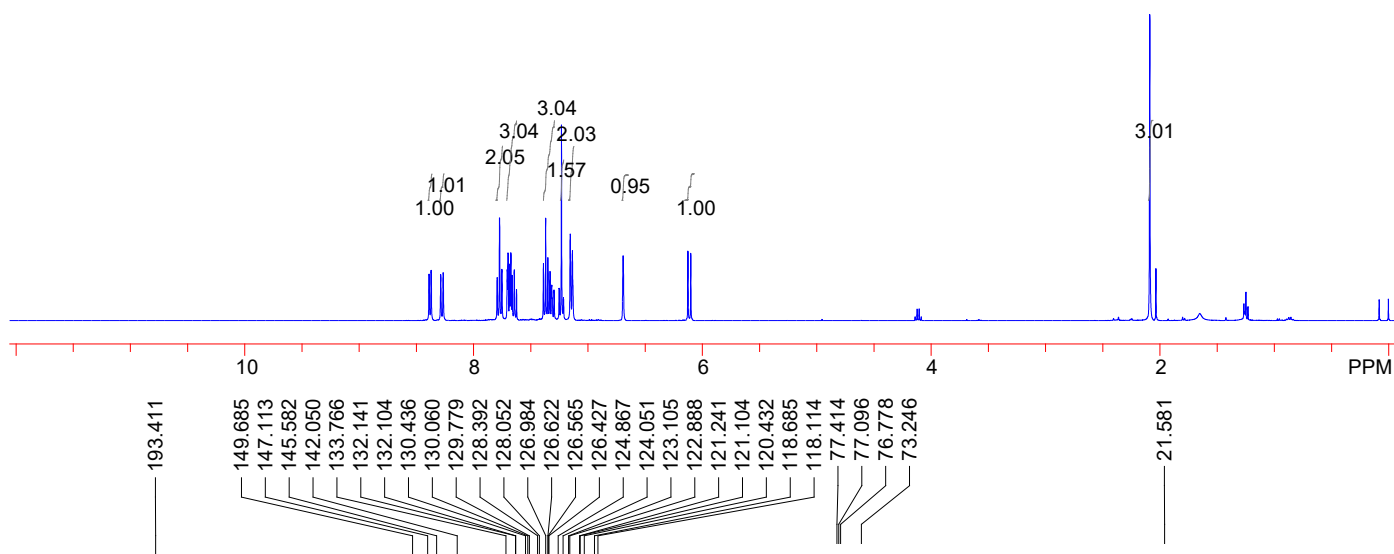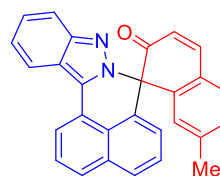

**5k**

$^{13}\text{C}\{^1\text{H}\}$  NMR ( $\text{CDCl}_3$ , 100 MHz)

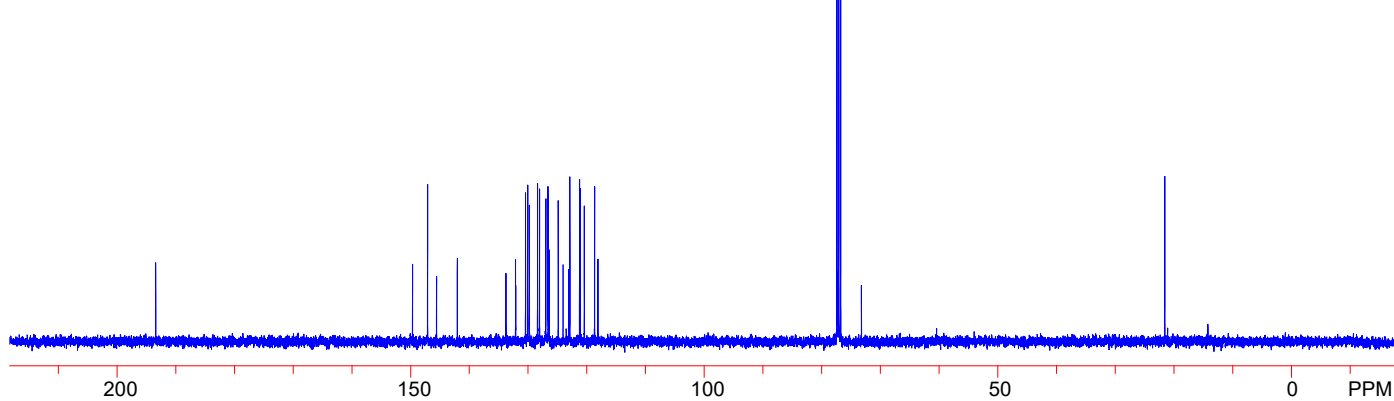

8.382  
8.364  
8.277  
8.255  
7.797  
7.778  
7.761  
7.702  
7.681  
7.665  
7.656  
7.646  
7.626  
7.441  
7.420  
7.383  
7.363  
7.344  
7.331  
7.315  
7.293  
7.249  
7.243  
7.229  
7.211  
7.189  
7.171  
6.869  
6.863  
6.848  
6.842  
6.414  
6.408  
6.062  
6.037  
3.539

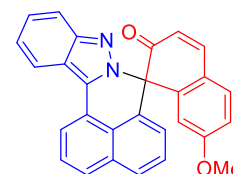

$^1\text{H}$  NMR ( $\text{CDCl}_3$ , 400 MHz)

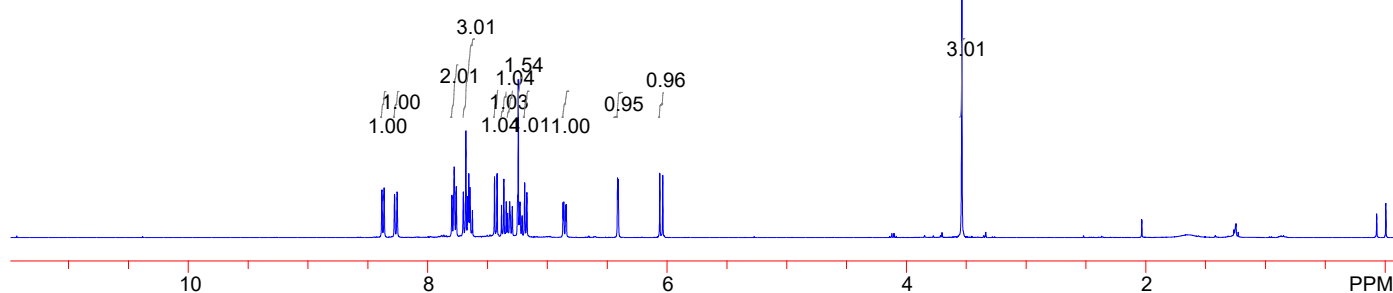

193.332  
149.742  
147.706  
146.947  
162.108  
133.758  
132.141  
131.794  
128.435  
128.045  
126.955  
126.644  
126.557  
124.744  
124.000  
123.054  
122.903  
122.202  
121.198  
121.111  
118.822  
118.641  
118.085  
116.077  
113.939  
77.392  
77.074  
76.756  
73.253  
55.413

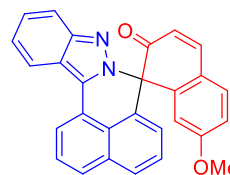

$^{13}\text{C}\{^1\text{H}\}$  NMR ( $\text{CDCl}_3$ , 100 MHz)

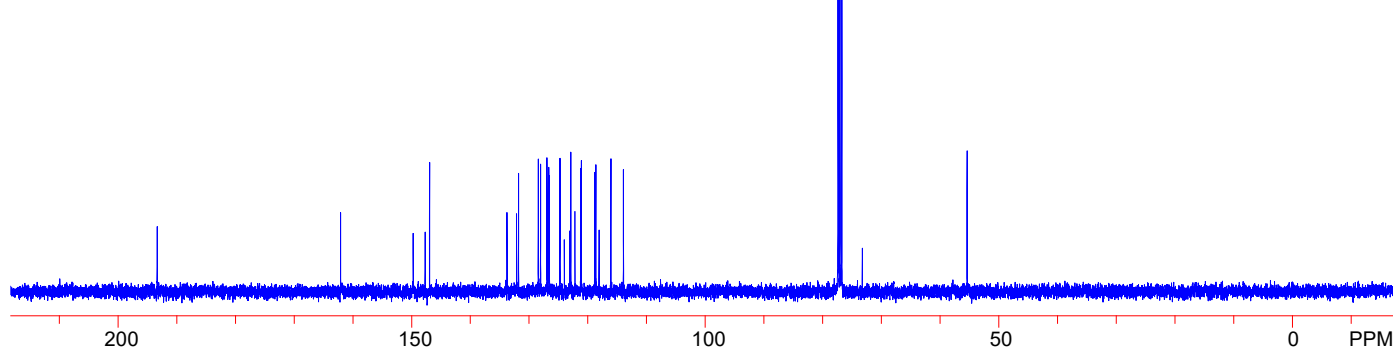

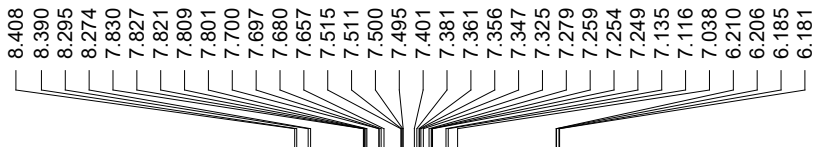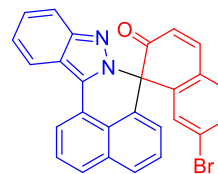

**5m**  
 $^1\text{H NMR}$  ( $\text{CDCl}_3$ , 400 MHz)

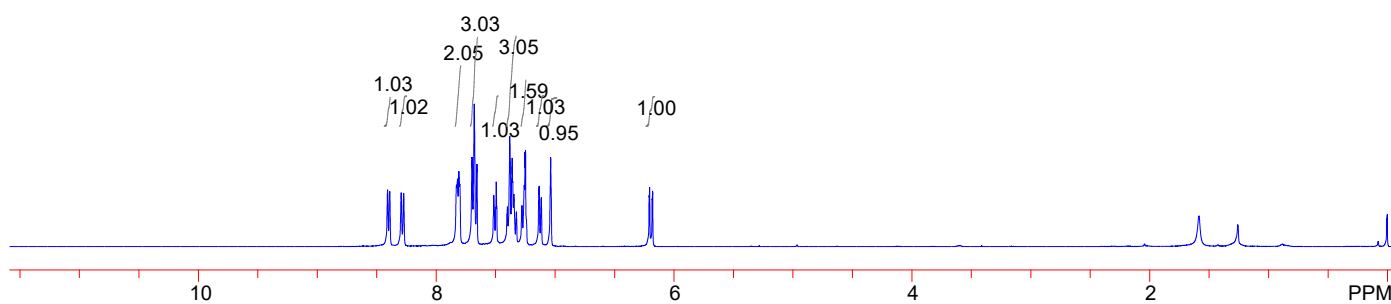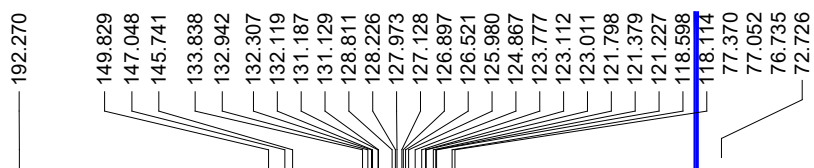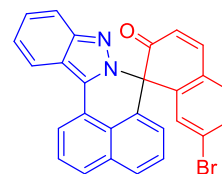

**5m**  
 $^{13}\text{C}\{^1\text{H}\}$  NMR ( $\text{CDCl}_3$ , 100 MHz)

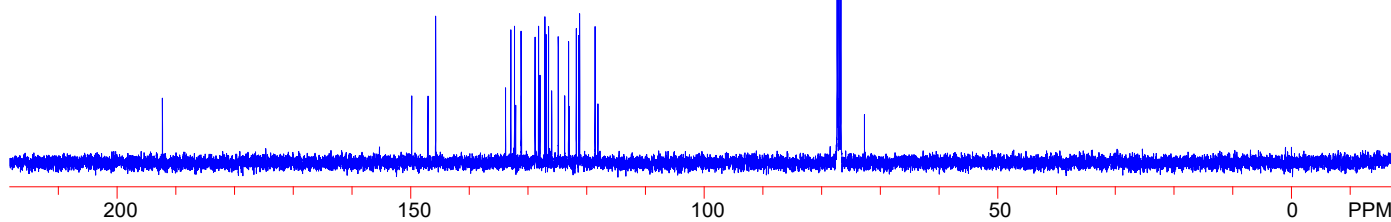

8.390  
8.388  
8.372  
8.270  
8.249  
7.813  
7.803  
7.792  
7.783  
7.681  
7.677  
7.663  
7.661  
7.653  
7.648  
7.642  
7.616  
7.389  
7.370  
7.350  
7.344  
7.328  
7.324  
7.305  
7.302  
7.259  
7.257  
7.244  
7.239  
7.222  
7.220  
7.130  
7.128  
7.111  
7.110  
6.798  
6.777  
6.221  
6.196

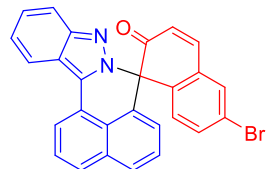

$^1\text{H}$  NMR ( $\text{CDCl}_3$ , 400 MHz)

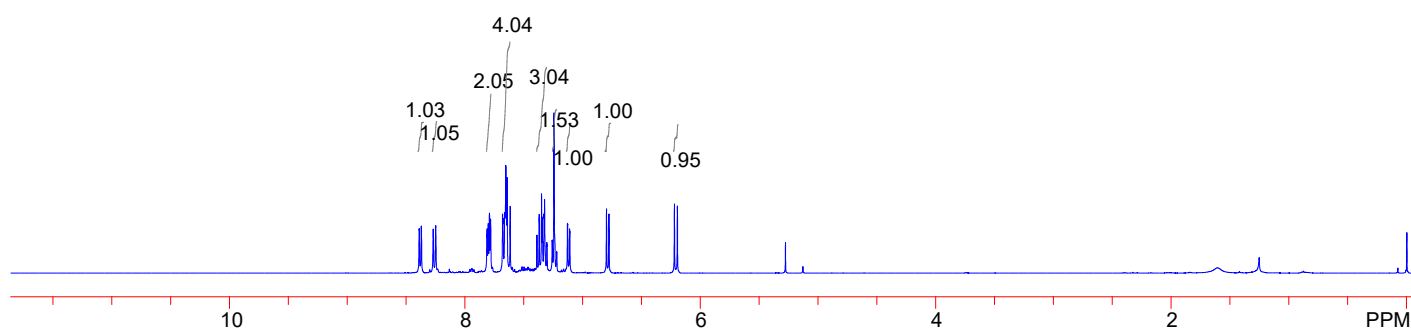

192.537  
134.018  
149.779  
145.214  
144.130  
133.802  
132.437  
132.076  
131.505  
131.274  
130.783  
128.768  
128.197  
127.114  
126.890  
126.514  
124.860  
123.834  
123.112  
123.054  
122.823  
122.737  
121.314  
121.176  
118.533  
118.107  
77.385  
77.067  
76.749  
72.805

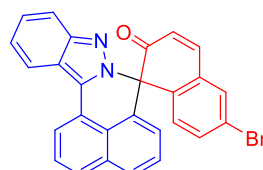

$^{13}\text{C}\{^1\text{H}\}$  NMR ( $\text{CDCl}_3$ , 100 MHz)

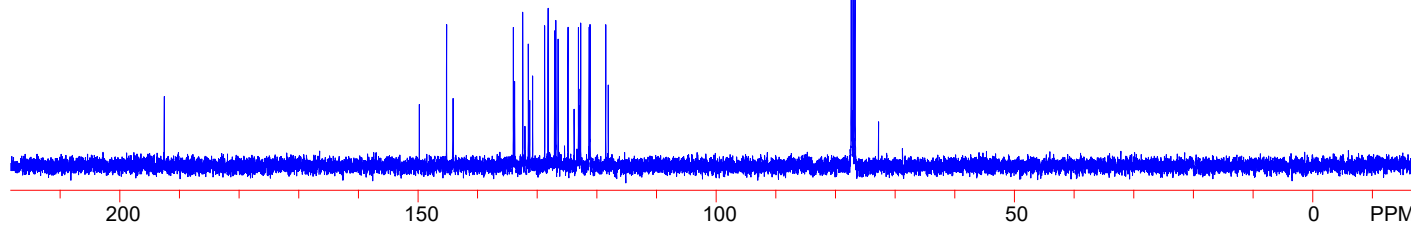

## VI. NMR spectra of 6 and 7

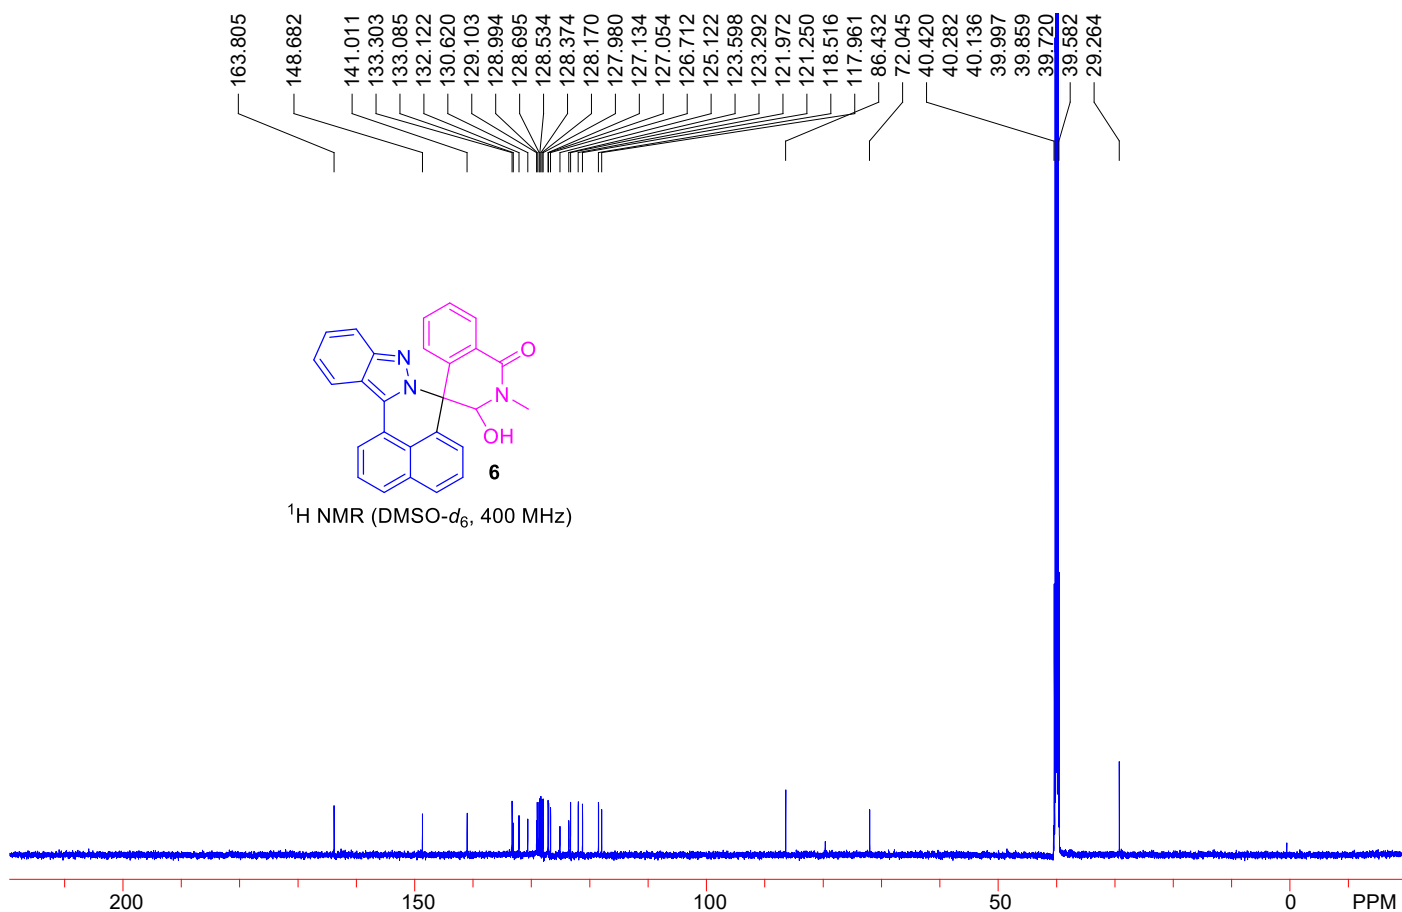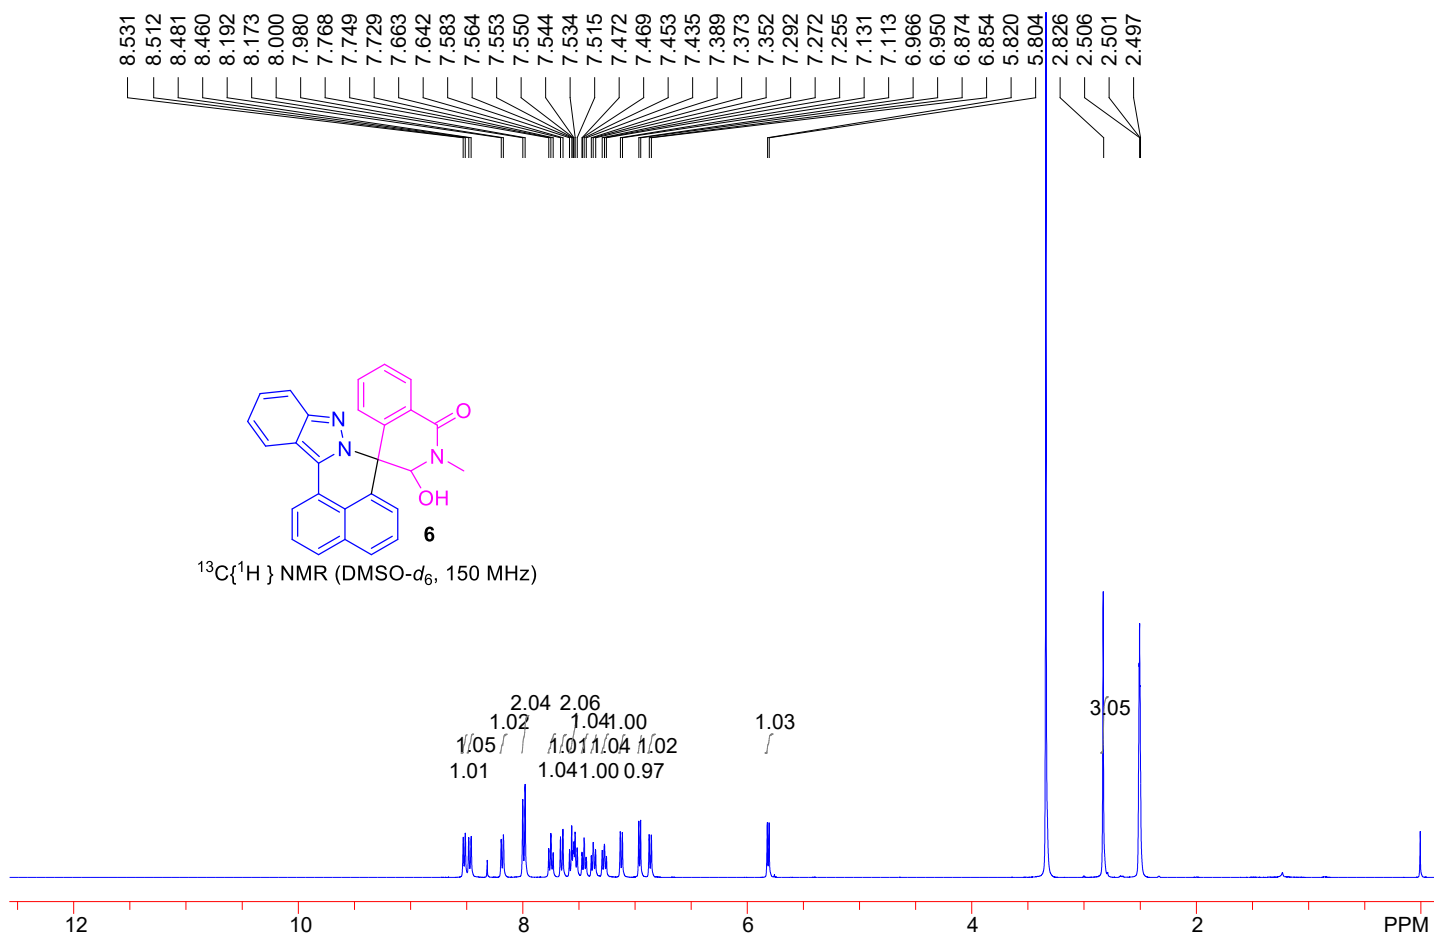

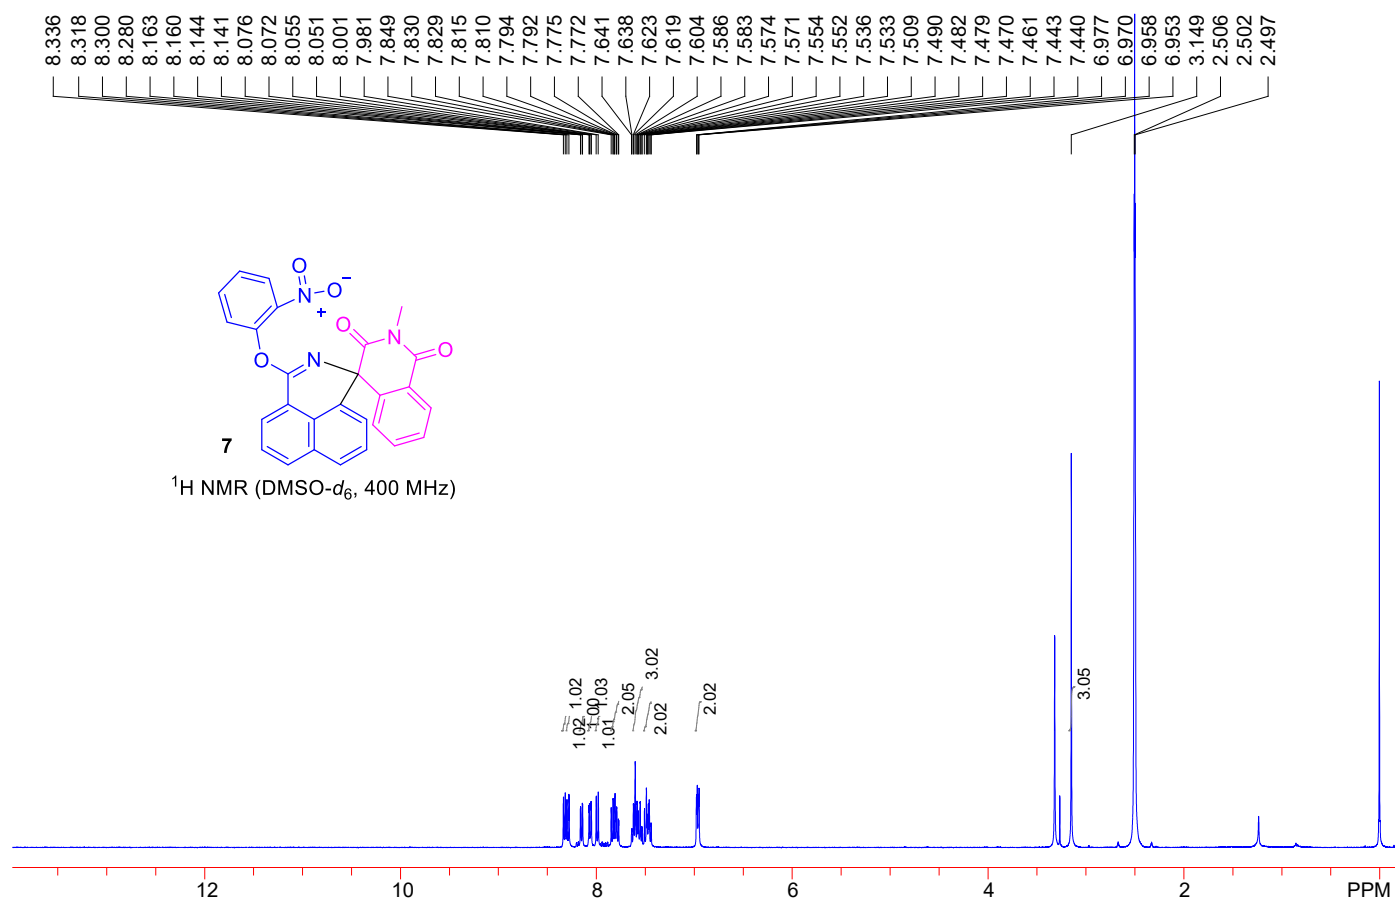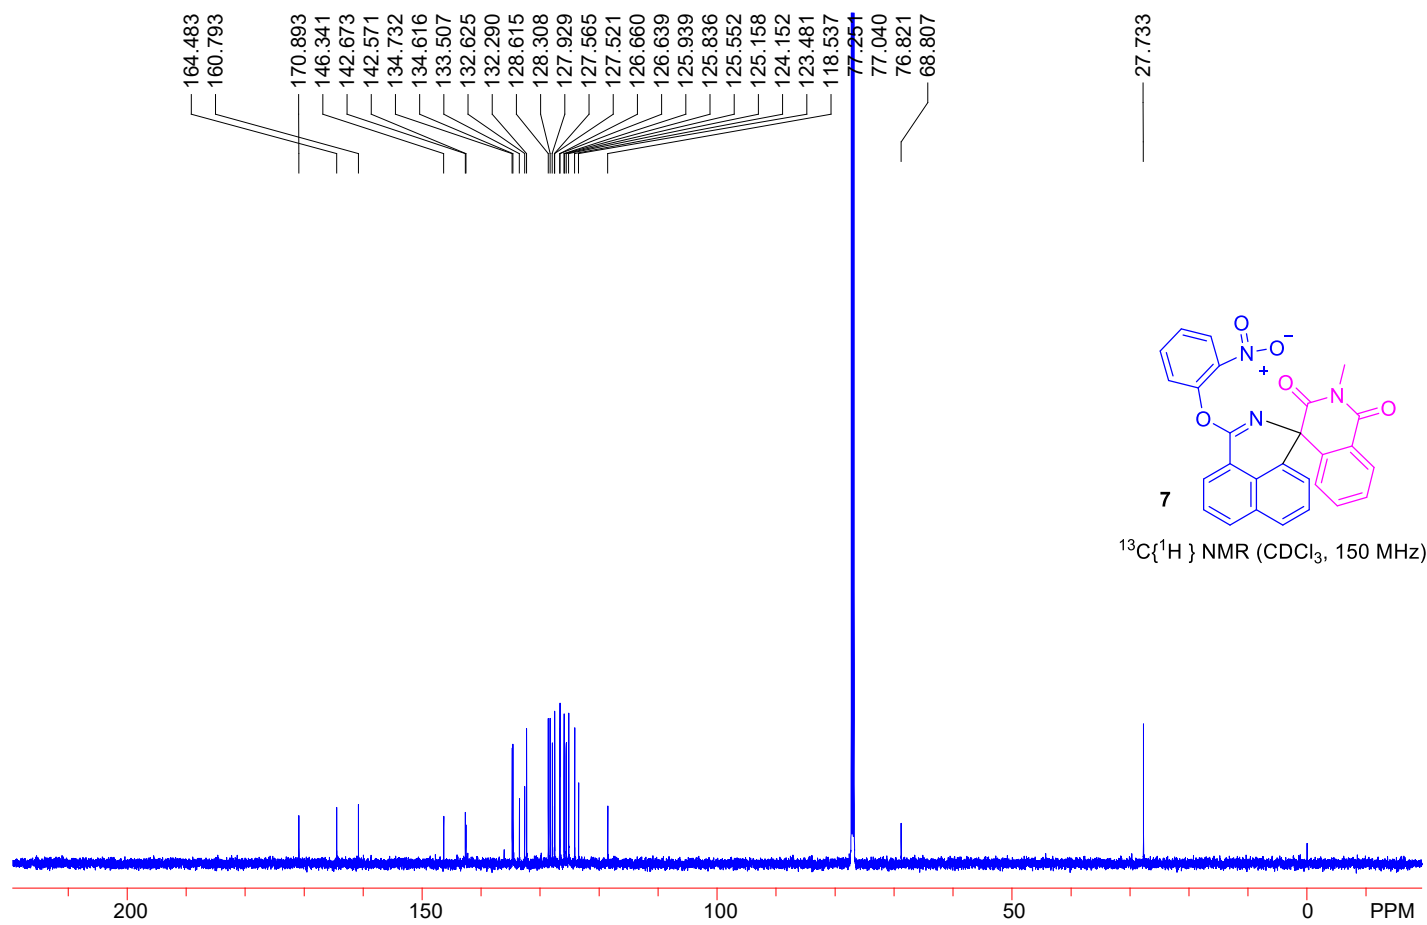

## VII. X-ray crystal structure and data of 3a

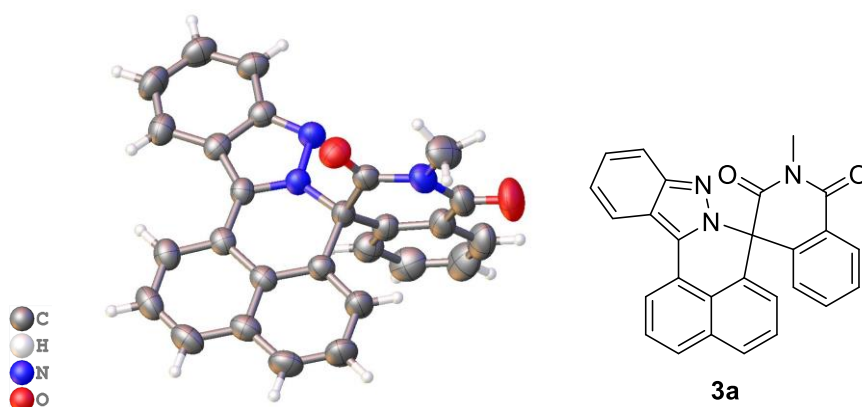

**Figure S3.** X-ray crystal structure of **3a** with 50% ellipsoid probability

**X-ray structure determination.** Single crystals suitable for X-ray diffraction were obtained by slow evaporation of the solvent from a chloroform solution of **3a**. Crystal data collection and refinement parameters of **3a** are summarized in Table S2. Intensity data were collected at 293 K on a SuperNova Dual diffractometer using mirror-monochromated Cu K $\alpha$  radiation,  $\lambda = 1.54184$  Å. The data were corrected for decay, Lorentz, and polarization effects as well as absorption and beam corrections based on the multi-scan technique. Using Olex2, the structure was solved with the SHELXS structure solution program using Direct Methods and refined with the SHELXL refinement package using Least Squares minimisation. Nonhydrogen atoms were refined with anisotropic displacement parameters. The H-atoms were either located or calculated and subsequently treated with a riding model.

**Table S2.** Crystallographic data and structure refinement results of **3a**

|                   |                                                               |
|-------------------|---------------------------------------------------------------|
| Empirical formula | C <sub>27</sub> H <sub>17</sub> N <sub>3</sub> O <sub>2</sub> |
| Formula weight    | 415.43                                                        |
| Temperature/K     | 293(2)                                                        |
| Crystal system    | monoclinic                                                    |
| Space group       | P2 <sub>1</sub> /c                                            |
| a/Å               | 10.5426(2)                                                    |
| b/Å               | 11.3200(2)                                                    |
| c/Å               | 17.0570(3)                                                    |
| $\alpha$ /°       | 90                                                            |
| $\beta$ /°        | 101.834(2)                                                    |

|                                               |                                                               |
|-----------------------------------------------|---------------------------------------------------------------|
| $\gamma/^\circ$                               | 90                                                            |
| Volume/ $\text{\AA}^3$                        | 1992.35(6)                                                    |
| Z                                             | 4                                                             |
| $\rho_{\text{calc}}/\text{cm}^3$              | 1.385                                                         |
| $\mu/\text{mm}^{-1}$                          | 0.716                                                         |
| F(000)                                        | 864.0                                                         |
| Crystal size/ $\text{mm}^3$                   | $0.2 \times 0.12 \times 0.1$                                  |
| Radiation                                     | Cu K $\alpha$ ( $\lambda = 1.54184$ )                         |
| $2\Theta$ range for data collection/ $^\circ$ | 8.57 to 142.932                                               |
| Index ranges                                  | $-12 \leq h \leq 11, -11 \leq k \leq 13, -17 \leq l \leq 20$  |
| Reflections collected                         | 8205                                                          |
| Independent reflections                       | 3793 [ $R_{\text{int}} = 0.0230, R_{\text{sigma}} = 0.0290$ ] |
| Data/restraints/parameters                    | 3793/0/290                                                    |
| Goodness-of-fit on $F^2$                      | 1.044                                                         |
| Final R indexes [ $I \geq 2\sigma(I)$ ]       | $R_1 = 0.0523, wR_2 = 0.1451$                                 |
| Final R indexes [all data]                    | $R_1 = 0.0616, wR_2 = 0.1553$                                 |
| Largest diff. peak/hole / $e \text{\AA}^{-3}$ | 0.26/-0.24                                                    |

## VIII. X-ray crystal structure and data of 5a

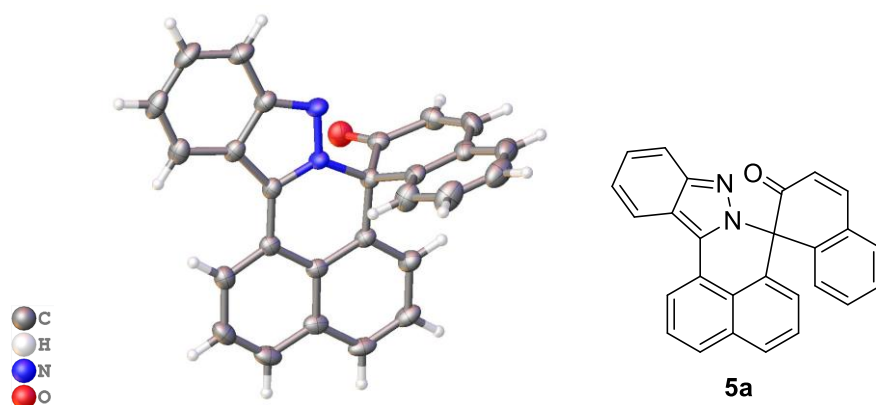

**Figure S4.** X-ray crystal structure of **5a** with 50% ellipsoid probability

**X-ray structure determination.** Single crystals suitable for X-ray diffraction were obtained by slow evaporation of the solvent from a dichloromethane/methanol (1:1) solution of **5a**. Crystal data collection and refinement parameters of **5a** are summarized in Table S3. Intensity data were collected at 170 K on a SuperNova Dual diffractometer using mirror-monochromated Cu K $\alpha$  radiation,  $\lambda = 1.54184 \text{ \AA}$ . The data were corrected for decay, Lorentz, and polarization effects as well as absorption and beam corrections based on the multi-scan technique. Using Olex2, the structure was solved with the SHELXS structure solution program using Direct Methods and refined with the SHELXL refinement package using Least Squares minimisation. Nonhydrogen atoms were refined with anisotropic displacement parameters. The H-atoms were either located or calculated and subsequently treated with a riding model.

**Table S3.** Crystallographic data and structure refinement results of **5a**

|                   |                                                  |
|-------------------|--------------------------------------------------|
| Empirical formula | C <sub>27</sub> H <sub>16</sub> N <sub>2</sub> O |
| Formula weight    | 384.42                                           |
| Temperature/K     | 170.00(10)                                       |
| Crystal system    | orthorhombic                                     |
| Space group       | Pbca                                             |
| a/ $\text{\AA}$   | 12.8646(3)                                       |
| b/ $\text{\AA}$   | 13.5761(2)                                       |
| c/ $\text{\AA}$   | 21.4206(4)                                       |
| $\alpha/^\circ$   | 90                                               |
| $\beta/^\circ$    | 90                                               |

|                                               |                                                               |
|-----------------------------------------------|---------------------------------------------------------------|
| $\gamma/^\circ$                               | 90                                                            |
| Volume/ $\text{\AA}^3$                        | 3741.13(12)                                                   |
| Z                                             | 8                                                             |
| $\rho_{\text{calc}}/\text{cm}^3$              | 1.365                                                         |
| $\mu/\text{mm}^{-1}$                          | 0.660                                                         |
| F(000)                                        | 1600.0                                                        |
| Crystal size/ $\text{mm}^3$                   | $0.2 \times 0.12 \times 0.1$                                  |
| Radiation                                     | Cu K $\alpha$ ( $\lambda = 1.54184$ )                         |
| $2\Theta$ range for data collection/ $^\circ$ | 8.256 to 142.214                                              |
| Index ranges                                  | $-15 \leq h \leq 7, -16 \leq k \leq 16, -25 \leq l \leq 26$   |
| Reflections collected                         | 9320                                                          |
| Independent reflections                       | 3537 [ $R_{\text{int}} = 0.0391, R_{\text{sigma}} = 0.0381$ ] |
| Data/restraints/parameters                    | 3537/0/271                                                    |
| Goodness-of-fit on $F^2$                      | 1.065                                                         |
| Final R indexes [ $I \geq 2\sigma(I)$ ]       | $R_1 = 0.0595, wR_2 = 0.1693$                                 |
| Final R indexes [all data]                    | $R_1 = 0.0699, wR_2 = 0.1766$                                 |
| Largest diff. peak/hole / $e \text{\AA}^{-3}$ | 0.30/-0.23                                                    |

## IX. X-ray crystal structure and data of 7

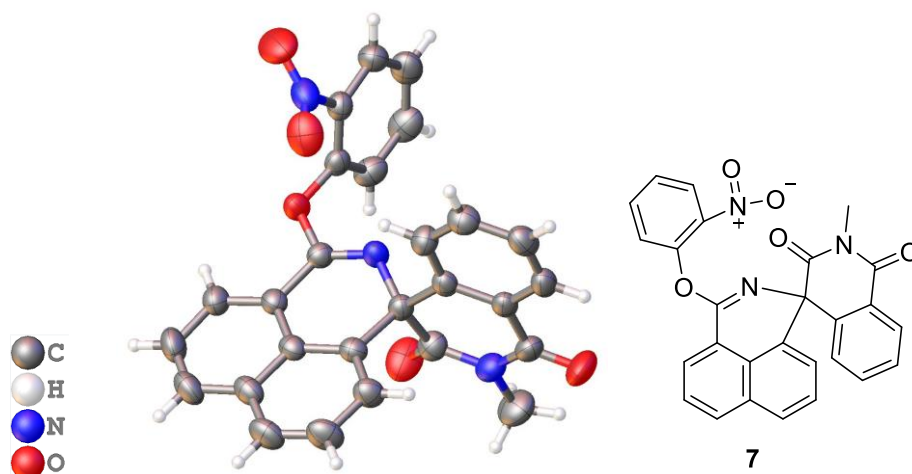

**Figure S5.** X-ray crystal structure of **7** with 50% ellipsoid probability

**X-ray structure determination.** Single crystals suitable for X-ray diffraction were obtained by slow evaporation of the solvent from a chloroform-*d* solution of **7**. Crystal data collection and refinement parameters of **7** are summarized in Table S4. Intensity data were collected at 294.53 K on a SuperNova Dual diffractometer using mirror-monochromated Cu K $\alpha$  radiation,  $\lambda = 1.54184$  Å. The data were corrected for decay, Lorentz, and polarization effects as well as absorption and beam corrections based on the multi-scan technique. Using Olex2, the structure was solved with the SHELXS structure solution program using Direct Methods and refined with the SHELXL refinement package using Least Squares minimisation. Nonhydrogen atoms were refined with anisotropic displacement parameters. The H-atoms were either located or calculated and subsequently treated with a riding model.

**Table S4.** Crystallographic data and structure refinement results of **7**

|                   |                                                               |
|-------------------|---------------------------------------------------------------|
| Empirical formula | C <sub>27</sub> H <sub>17</sub> N <sub>3</sub> O <sub>5</sub> |
| Formula weight    | 463.43                                                        |
| Temperature/K     | 294.53(10)                                                    |
| Crystal system    | monoclinic                                                    |
| Space group       | P2 <sub>1</sub> /c                                            |
| a/Å               | 13.6356(4)                                                    |
| b/Å               | 8.3718(2)                                                     |
| c/Å               | 19.9438(6)                                                    |
| $\alpha$ /°       | 90                                                            |

|                                                |                                                               |
|------------------------------------------------|---------------------------------------------------------------|
| $\beta/^\circ$                                 | 108.495(3)                                                    |
| $\gamma/^\circ$                                | 90                                                            |
| Volume/ $\text{\AA}^3$                         | 2159.09(11)                                                   |
| Z                                              | 4                                                             |
| $\rho_{\text{calc}}/\text{g/cm}^3$             | 1.426                                                         |
| $\mu/\text{mm}^{-1}$                           | 0.830                                                         |
| F(000)                                         | 960.0                                                         |
| Crystal size/ $\text{mm}^3$                    | $0.2 \times 0.12 \times 0.1$                                  |
| Radiation                                      | Cu K $\alpha$ ( $\lambda = 1.54184$ )                         |
| 2 $\Theta$ range for data collection/ $^\circ$ | 6.836 to 142.536                                              |
| Index ranges                                   | $-16 \leq h \leq 16, -6 \leq k \leq 10, -24 \leq l \leq 24$   |
| Reflections collected                          | 9321                                                          |
| Independent reflections                        | 4063 [ $R_{\text{int}} = 0.0283, R_{\text{sigma}} = 0.0404$ ] |
| Data/restraints/parameters                     | 4063/0/317                                                    |
| Goodness-of-fit on $F^2$                       | 1.087                                                         |
| Final R indexes [ $I \geq 2\sigma(I)$ ]        | $R_1 = 0.0564, wR_2 = 0.1579$                                 |
| Final R indexes [all data]                     | $R_1 = 0.0841, wR_2 = 0.1681$                                 |
| Largest diff. peak/hole / $e \text{\AA}^{-3}$  | 0.30/-0.24                                                    |

## X. UV-vis, fluorescence experimental data and cell imaging results

### 1. UV-vis, fluorescence experimental data

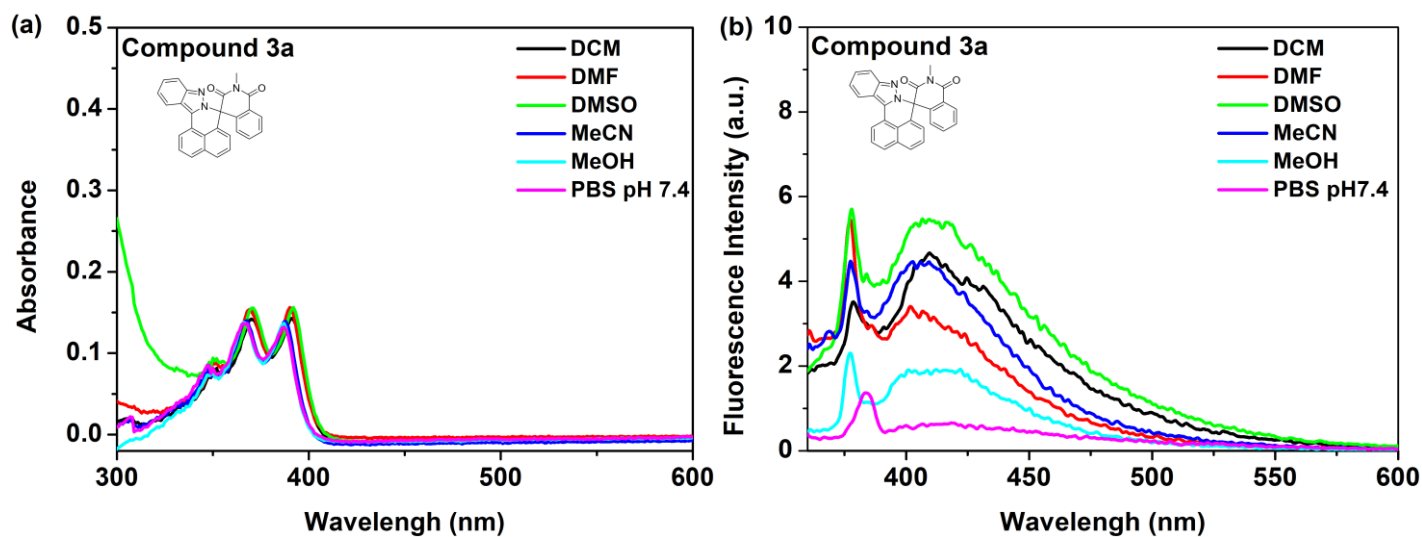

Figure S6. Absorption (a) and fluorescence (b) of compound **3a** in diverse solvents.

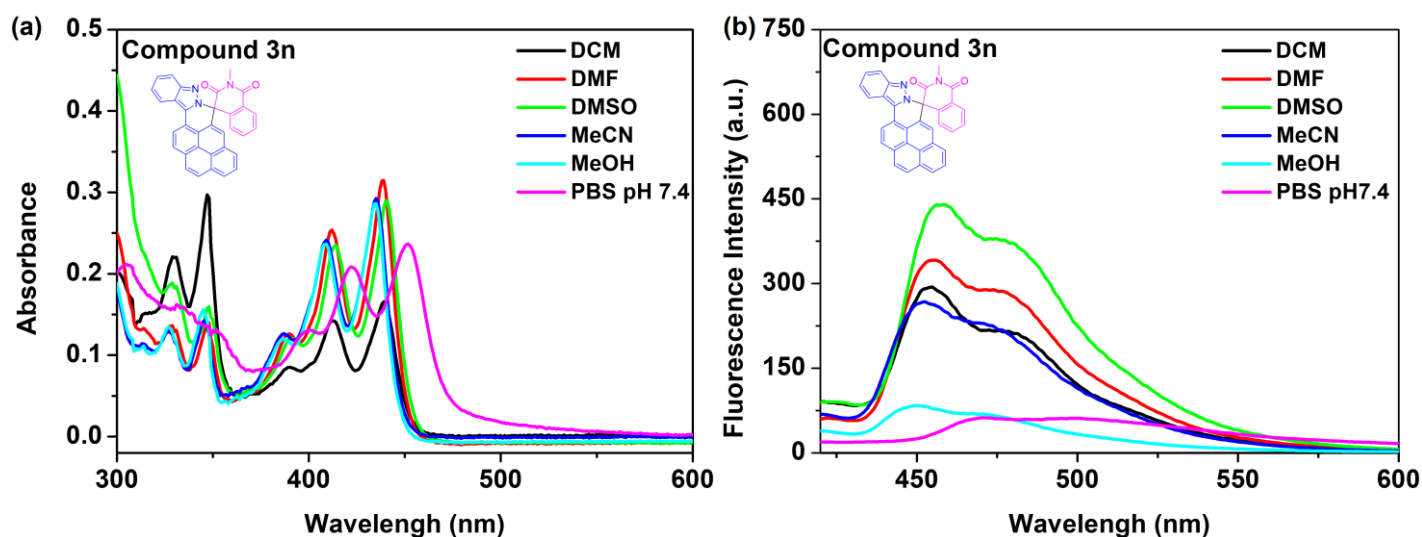

Figure S7 Absorption (a) and fluorescence (b) of compound **3n** in diverse solvents.

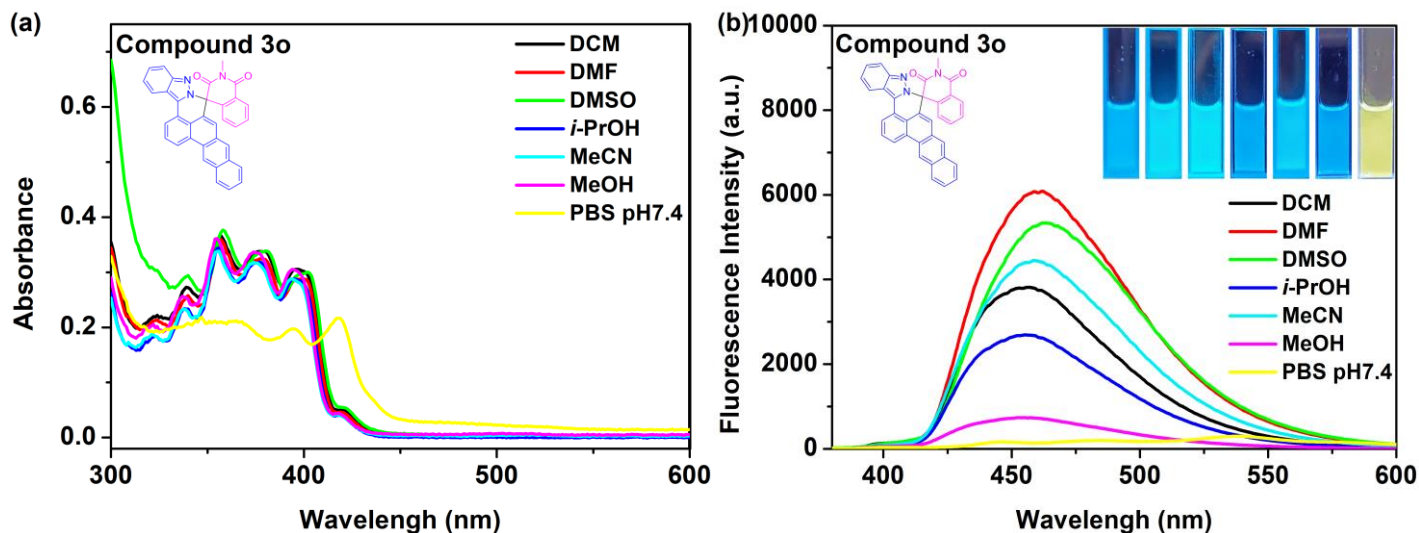

**Figure S8.** Absorption (a) and fluorescence (b) of compound **3o** in diverse solvents, insert: photos under 365 nm irradiation.

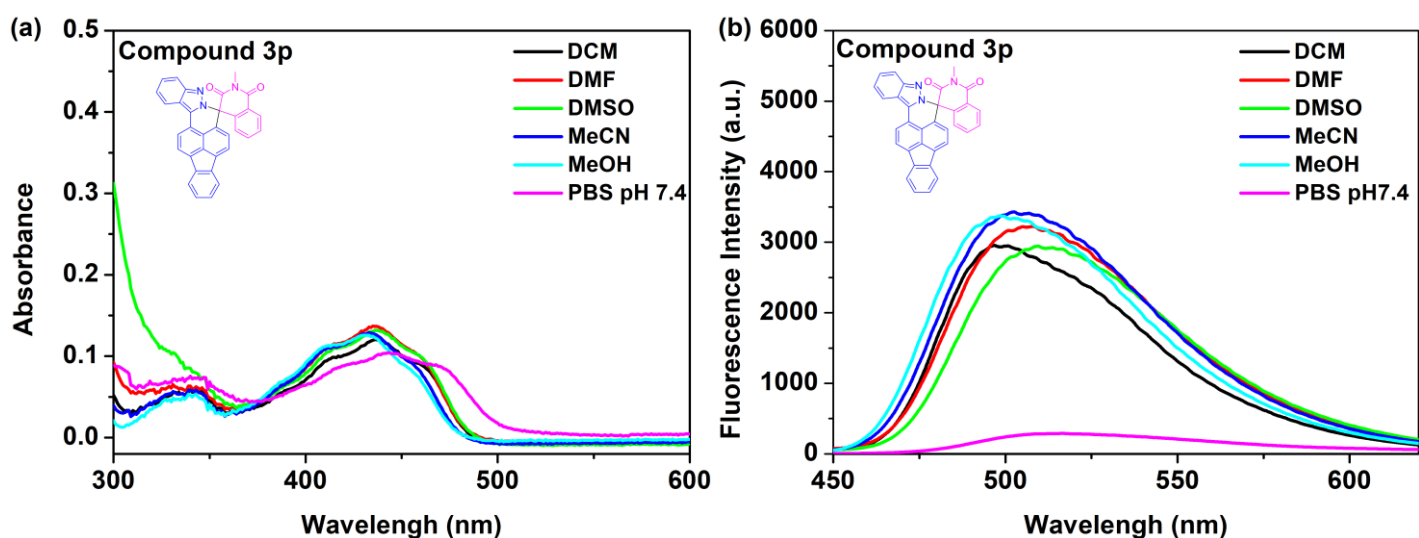

**Figure S9.** Absorption (a) and fluorescence (b) of compound **3p** in diverse solvents.

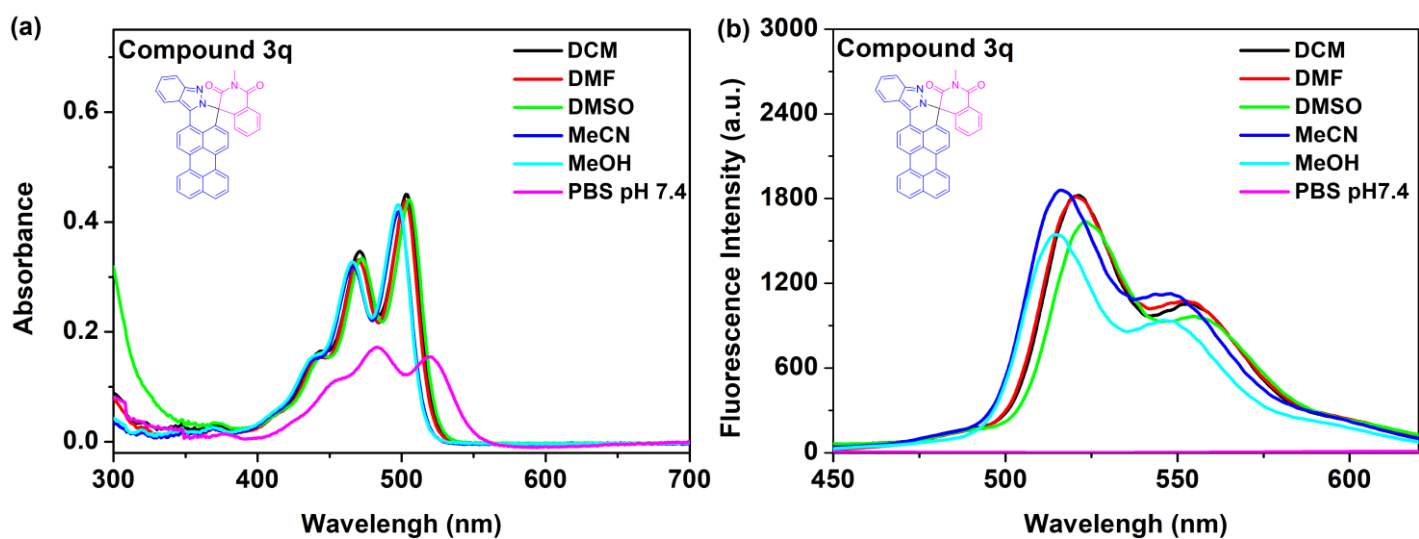

**Figure S10.** Absorption (a) and fluorescence (b) of compound **3q** in diverse solvents.

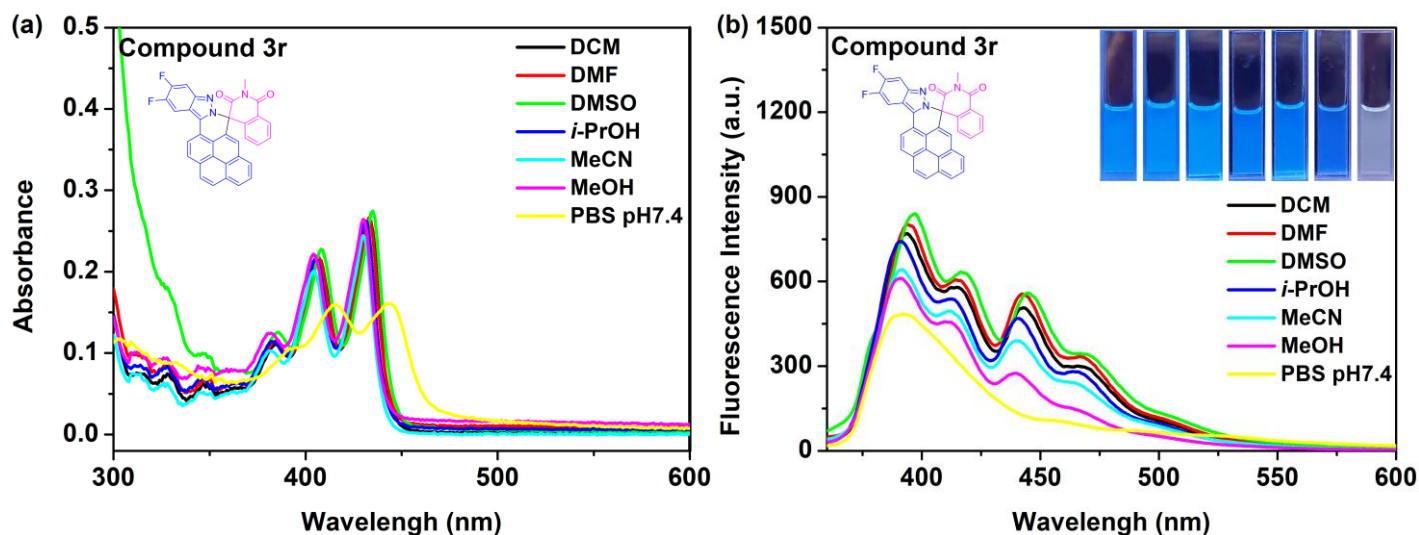

**Figure S11.** Absorption (a) and fluorescence (b) of compound **3r** in diverse solvents, insert: photos under 365 nm irradiation.

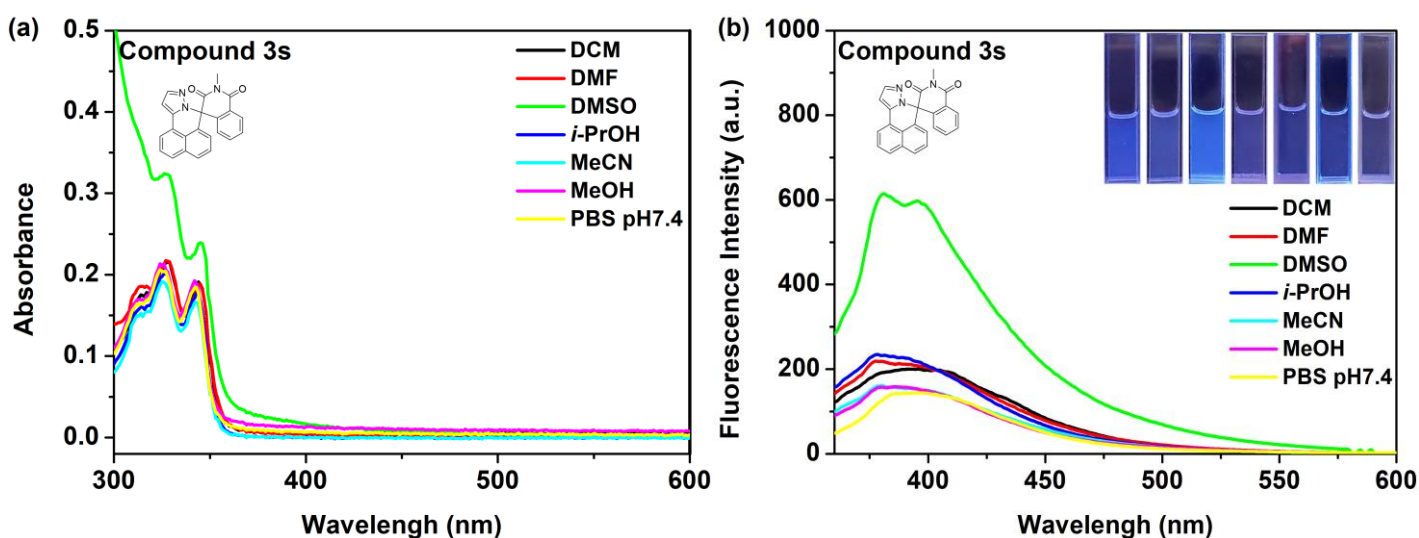

**Figure S12.** Absorption (a) and fluorescence (b) of compound **3s** in diverse solvents, insert: photos under 365 nm irradiation.

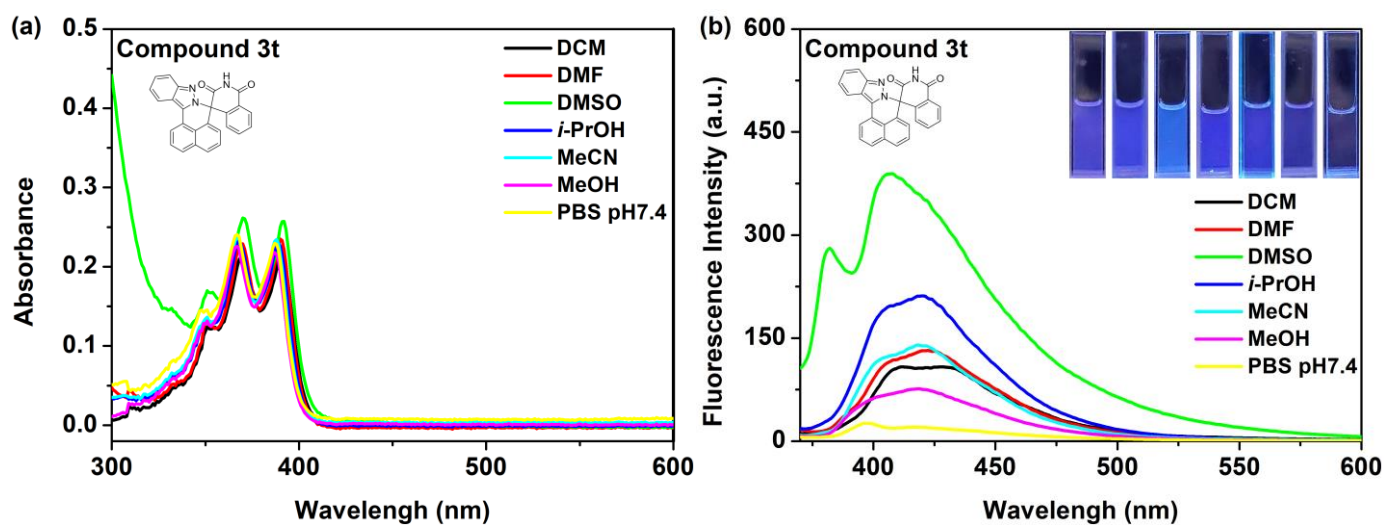

**Figure S13.** Absorption (a) and fluorescence (b) of compound **3t** in diverse solvents, insert: photos under 365 nm irradiation.

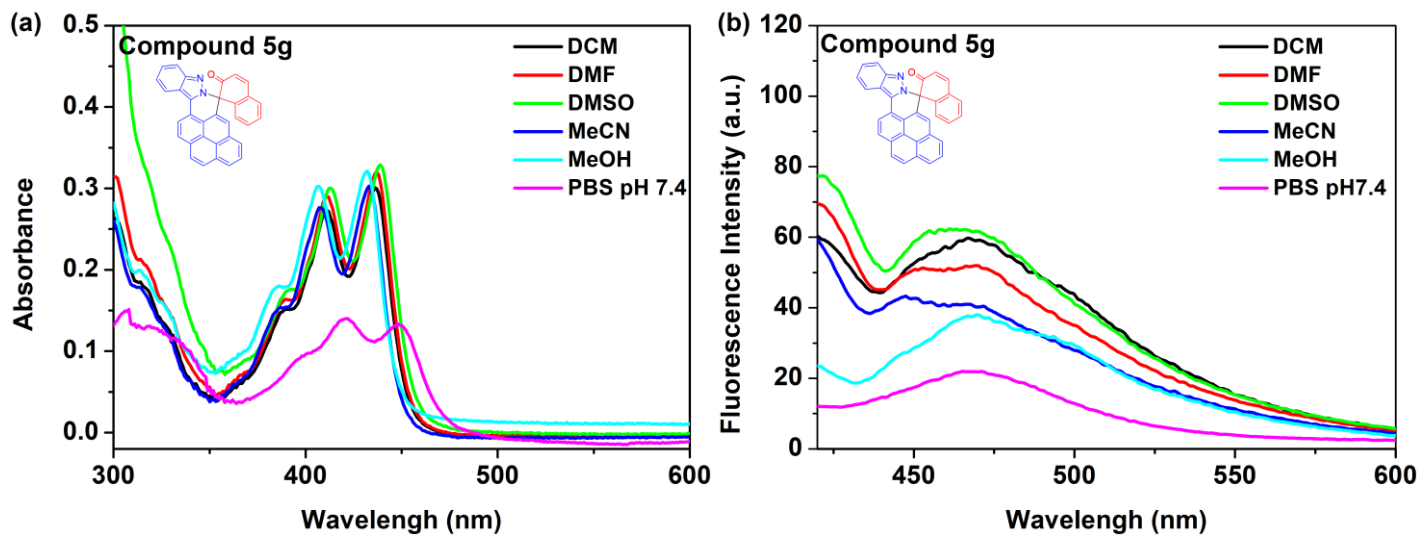

Figure S14. Absorption (a) and fluorescence (b) of compound **5g** in diverse solvents.

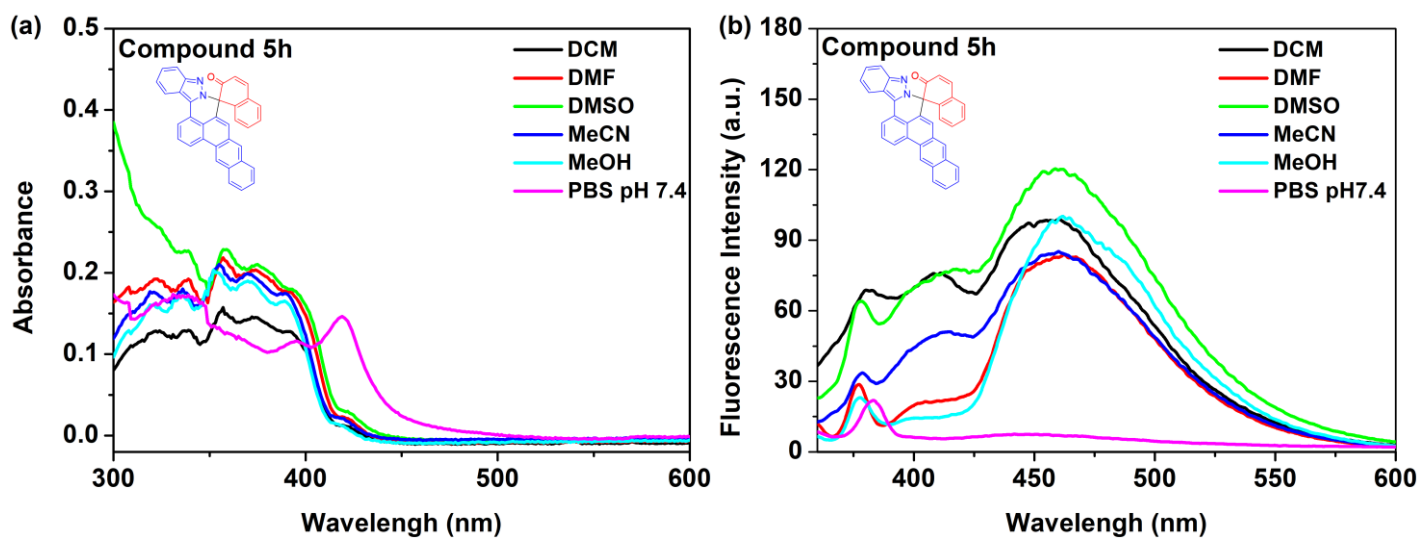

Figure S15. Absorption (a) and fluorescence (b) of compound **5h** in diverse solvents.

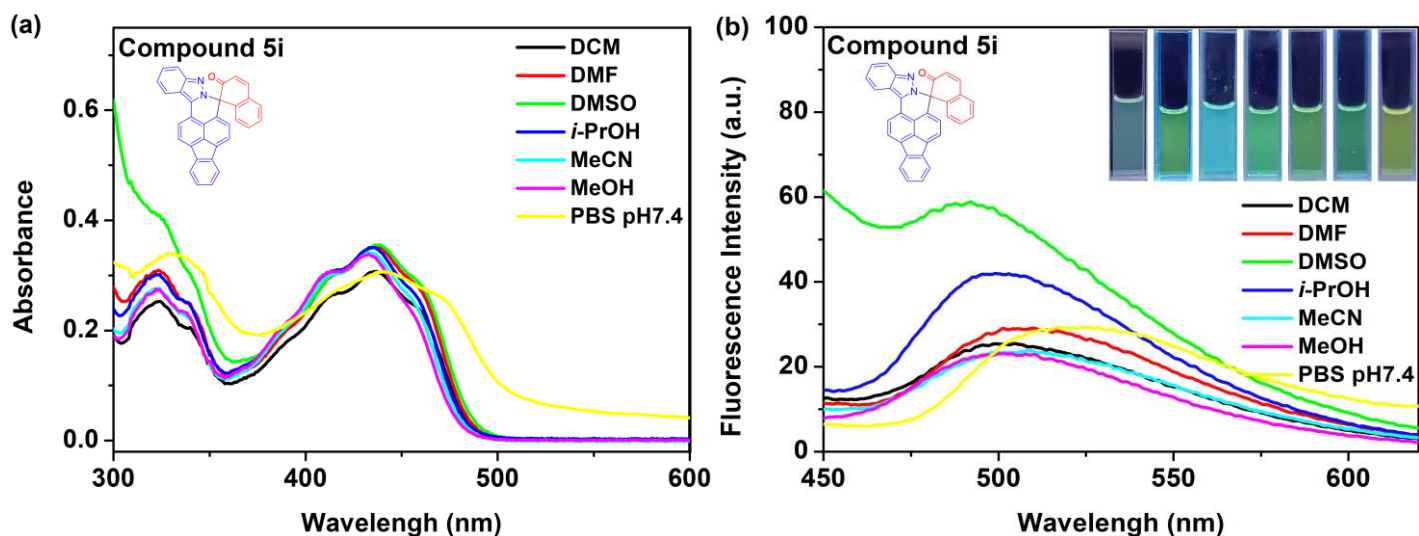

Figure S16. Absorption (a) and fluorescence (b) of compound **5i** in diverse solvents, insert: photos under 365 nm irradiation.

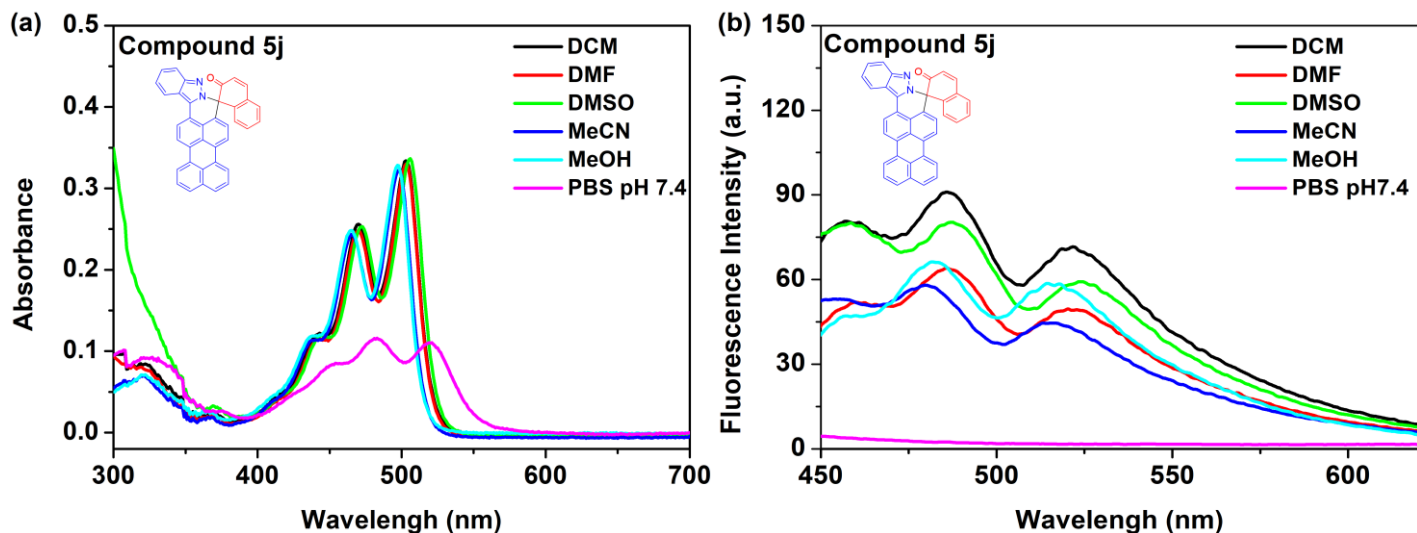

Figure S17. Absorption (a) and fluorescence (b) of compound 5j in diverse solvents.

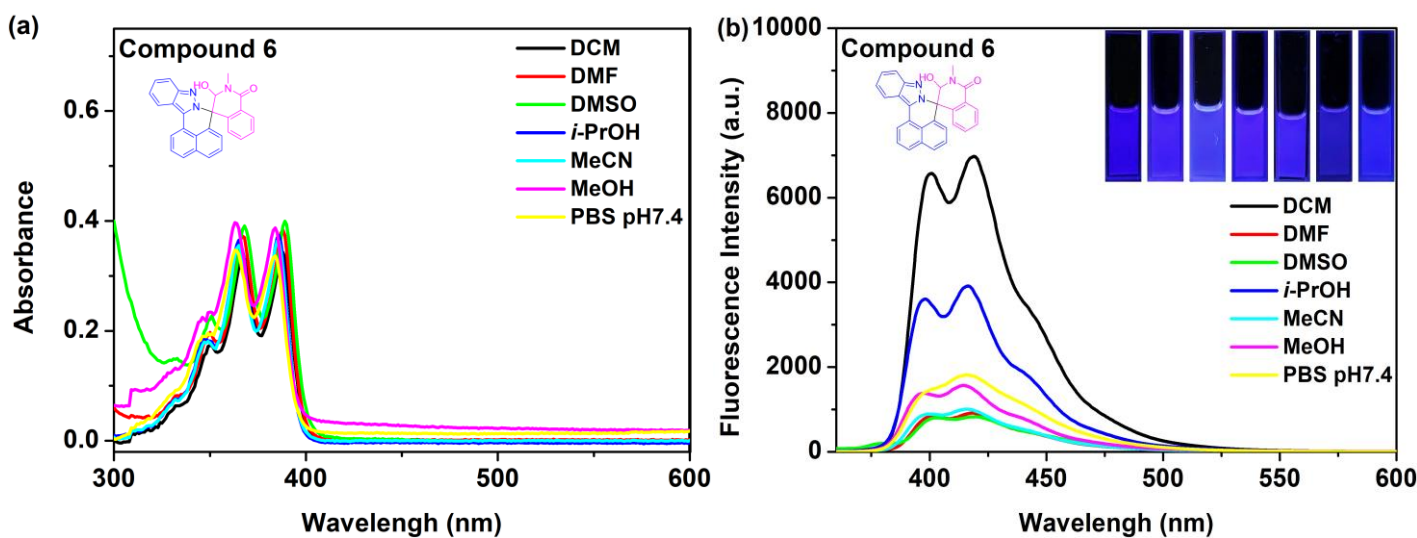

Figure S18. Absorption (a) and fluorescence (b) of compound 6 in diverse solvents, insert: photos under 365 nm irradiation.

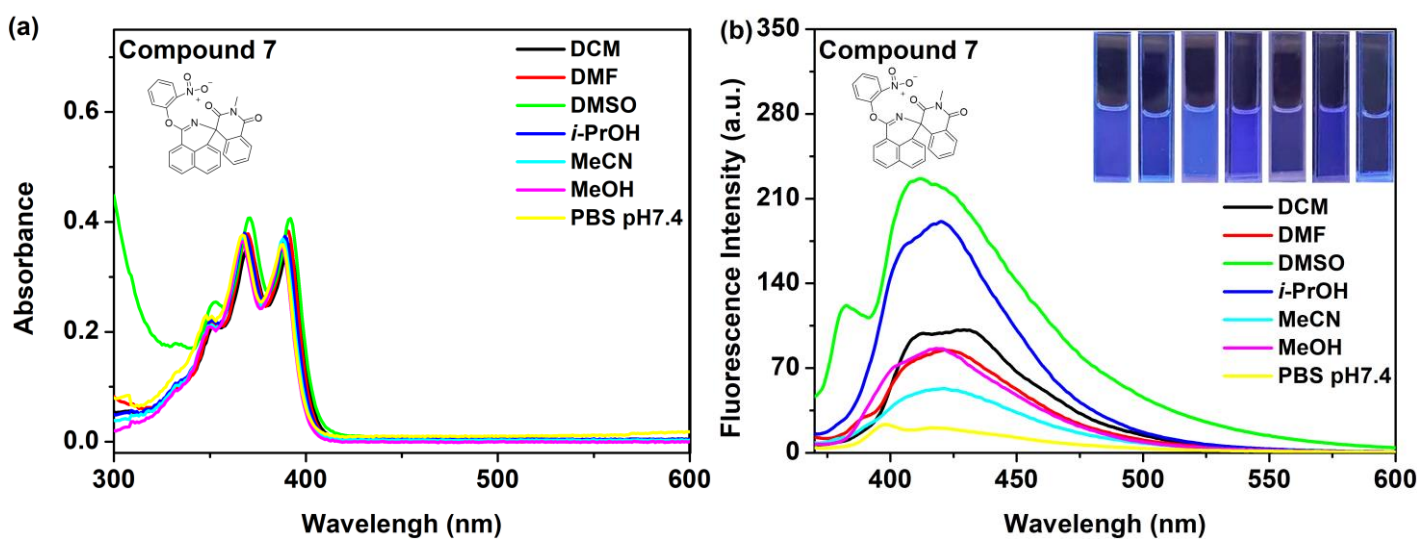

Figure S19. Absorption (a) and fluorescence (b) of compound 7 in diverse solvents, insert: photos under 365 nm irradiation.

## 2. Cell imaging results

Hela cells, sourced from Biomedical Engineering Center of Henan Normal University (Henan Xinxiang, China), were cultured in DMEM (Dulbecco's modified Eagle's medium) supplemented with 10% FBS (fetal bovine serum) at 37 °C under a 5% CO<sub>2</sub> atmosphere. Four HeLa cells were rinsed with DPBS buffer (pH 7.4) and treated with **3o** (2, 5, 10, 20 μM) for 0.5 h. Before imaging, all cells were washed three times with DPBS, then the fluorescence imaging was carried out on an Olympus FV1200-IX81 confocal fluorescence microscope with 405 nm excitation for emission range of 440-490 nm (green was the pseudo color in the images).

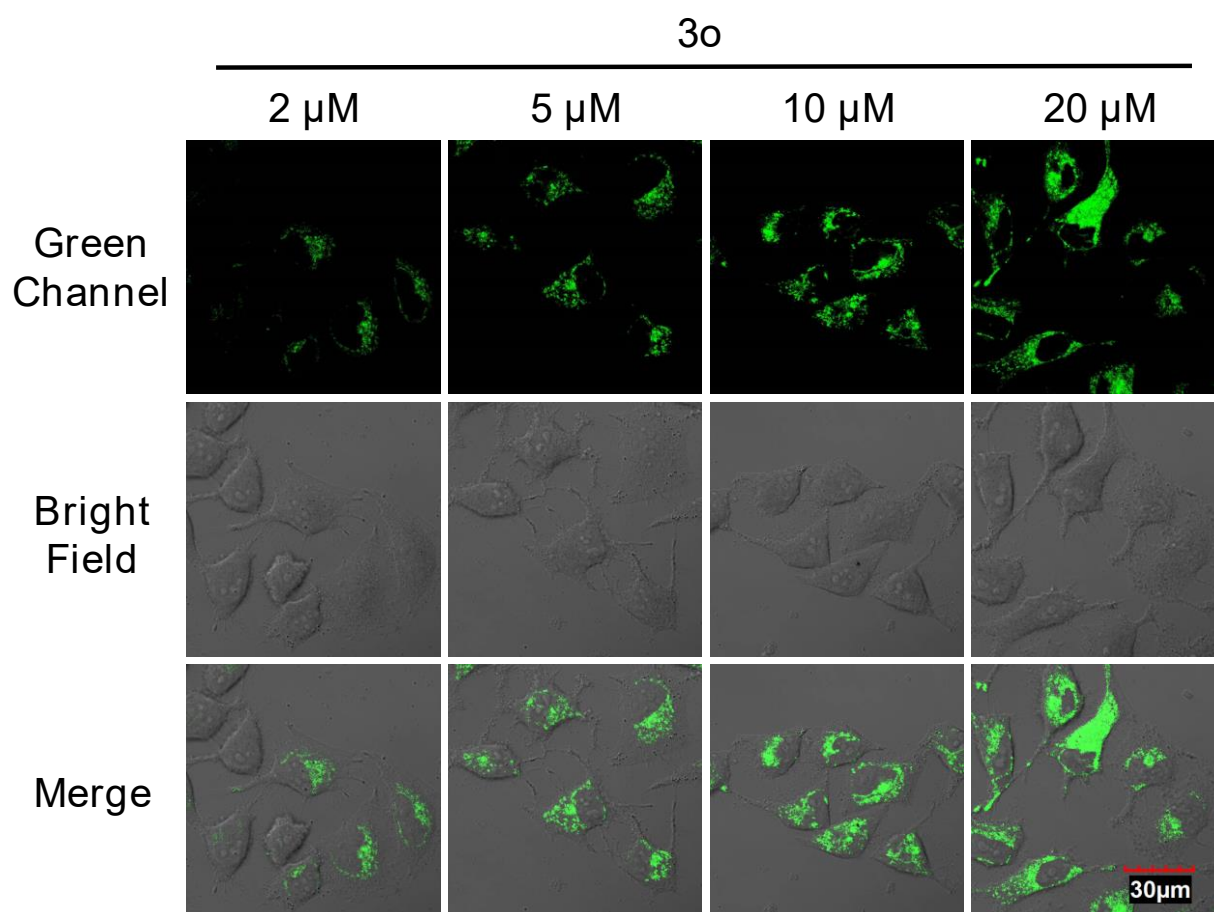

**Figure S20.** Fluorescence imaging of HeLa cells by 2, 5, 10, and 20 μM **3o** staining. Excitation wavelength of 405 nm for green channel (440-490 nm). Scale bars: 30 μm.

## XI. References

- [1] Li, P.; Zhao, J.; Wu, C.; Larock, R. C.; Shi, F. Synthesis of 3-Substituted Indazoles from Arynes and *N*-Tosylhydrazones. *Org. Lett.* **2011**, *13*, 3340–3343.
- [2] Dar'in, D.; Kantin, G.; Krasavin, M. D. A 'Sulfonyl-Azide-Free' (SAFE) Aqueous-Phase Diazo Transfer Reaction for Parallel and Diversity-Oriented Synthesis. *Chem. Commun.* **2019**, *55*, 5239–5242.
- [3] Liu, Z.; Wu, J.-Q.; Yang, S.-D. Ir(III)-Catalyzed Direct C–H Functionalization of Arylphosphine Oxides: A Strategy for MOP-Type Ligands Synthesis. *Org. Lett.*, **2017**, *19*, 5434.
- [4] Zhao, Y.; Dong, X.; Zhang, Z.; Li, J.; Zhou, J.; Liu, J. Metal-free Oxidative Spirocyclization of Pyrrole-2-carboxamides. *J. Org. Chem.* **2025**, *90*, 12717–12726.
